# Supplementary material
Source: publisher figshare collection journal article supplement (https://gsapubs.figshare.com/articles/dataset/_/17213465)
Supplement: Supplementary file 1 [file 3]

## Sheet: Major Elements Table
Table S1. Major oxide percentages for metaigneous rocks of the Wedowee-Emuckfaw-Dahlonega basin.
Sample	ALX001	DAV001	DEX023	EQU002	JKG006	JKG029	JKG039	JKG060	OUR004	OUR018	OUR039	OUR040	RSW003	BUT010	BUT011	BUT012	JKG030	OUR029	RED002	RED003	RED005	RED024	JKG013	RAS021	RAS022	RAS024	ALX028*
Unit	Zana	Zana	Zana	Zana	Zana	Zana	Zana	Zana	Zana	Zana	Zana	Zana	Zana	Kowaliga	Kowaliga	Kowaliga	Kowaliga	Kowaliga	Kowaliga	Kowaliga	Kowaliga	Kowaliga	Zana (Coley Creek)	Zana (Coley Creek)	Zana (Coley Creek)	Zana (Coley Creek)	Wedowee Group metavolcanic
SiO2	75.23	73.42	73.23	68.68	71.93	74.41	75.12	75.82	70.49	74.16	74.43	74.02	74.54	71.72	71.55	73.91	74.41	77.33	75.8	78.67	68.32	76.45	68.53	66.18	70.78	71.88	67.4895
TiO2	0.07	0.2	0.21	0.47	0.13	0.15	0.08	0.03	0.25	0.21	0.22	0.13	0.19	0.54	0.41	0.2	0.18	0.26	0.2	0.21	0.51	0.16	0.29	0.36	0.3	0.26	0.447198
Al2O3	14.63	14.71	15.63	18.83	16.52	15.01	14.68	14.76	16.03	14.89	15.17	14.93	14.38	14.54	14.83	14.85	14.39	11.74	12.75	11.48	16.55	13.63	15.84	16.46	14.8	15.24	16.04
Fe2O3	0.54	1.49	1.67	3.44	0.95	1.42	0.93	0.13	1.51	1.32	1.41	0.69	1.35	2.72	2.59	1.13	1.35	1.72	1.56	1.23	3.01	0.74	2.32	3.71	3.12	1.93	4.78719
MnO	0.01	0.04	0.03	0.04	0.06	0.11	0.04	0.01	0.03	0.02	0.01	0.02	0.04	0.05	0.05	0.03	0.04	0.04	0.04	0.03	0.05	0.01	0.06	0.1	0.08	0.05	0.0866816
MgO	0.09	0.42	0.5	1.2	0.25	0.21	0.13	0.06	0.53	0.27	0.41	0.19	0.41	0.82	0.77	0.27	0.42	0.44	0.13	0.14	1.12	0.1	0.99	1.3	0.97	0.8	1.39577
CaO	0.57	2.1	0.41	1.9	1.86	0.5	0.39	0.87	1.01	0.5	0.81	0.86	0.52	2.58	2.44	0.97	0.52	1.36	0.14	0.15	3.25	0.49	1.53	2.12	1.21	1.33	2.46156
Na2O	3.86	3.88	2.98	2.93	4.86	3.31	3.84	4.96	3.02	3.24	2.05	3.44	3.6	3.41	3.5	3.13	3.74	3.61	3.37	3.44	4.49	2.54	3.04	3.41	3.71	3.67	3.61009
K2O	4.92	3.65	5.16	2.3	3.36	4.65	4.59	3.24	6.91	5.1	5.3	5.59	4.75	3.49	3.76	5.14	4.73	3.45	5.98	4.63	2.6	5.86	7.1	5.9	4.76	4.66	3.05553
P2O5	0.07	0.1	0.17	0.22	0.08	0.23	0.19	0.13	0.21	0.3	0.17	0.13	0.21	0.12	0.11	0.36	0.21	0.05	0.03	0.03	0.11	0.02	0.3	0.47	0.28	0.18	0.626471
LOI	0.873649	0.0625251	1.32123	3.14895	1.94116	0.688936	0.883696	0.0371212	0.925224	0.954255	0.0140213	0.653957	1.13655	0.128217	0.148681	0.0889039	0.504606	0.100859	1.36053	0.753073	1.24463	0.950599	0.32033	0.666839	0.66252	0.791907	--
TOTAL	99.99	100.01	99.99	100.01	100	100	99.99	100.01	99.99	100.01	99.98	100	99.99	99.99	100.01	99.99	99.99	100	100	100.01	100.01	100	100	100.01	100.01	100	100
ASI	1.1495	1.03819	1.38952	1.74727	1.09919	1.31644	1.22248	1.11309	1.1205	1.26453	1.43127	1.12327	1.19594	1.03148	1.03834	1.18861	1.17636	0.965477	1.03759	1.04777	1.02619	1.19248	1.02244	1.03694	1.09853	1.12748	1.16754

## Sheet: U-Pb Table
Table S2. Measured isotope ratios and normalized U-Pb ages calculated without 204Pb correction
								Age		207Pb/235U ages calculated from measured 238U		Age		Percent 207Pb/206Pb Discordance	Percent 207Pb/235U Discordance	Total
Grain name	Unit	206Pb/238U	2 s error	*207Pb/235U	2 s error	207Pb/206Pb	2 s error	206Pb/238U	2 s error	*207Pb/235U	2 s error	207Pb/206Pb	2 s error			204(Hg+Pb)/206Pb
ALX001_01a	Zana	0.069414	0.000996961	0.568366	0.0112331	0.0593854	0.000806011	432.61	12.0133	456.934	14.4923	581	58.9608	25.5404	5.32329	0.00353226
ALX001_01b	Zana	0.0674679	0.00188964	0.475239	0.0168551	0.0510873	0.00111084	420.869	22.802	394.781	23.0694	244.5	100.18	-72.1346	-6.60816	-0.00245601
ALX001_02	Zana	0.0699363	0.000987942	0.54124	0.00823529	0.0561288	0.000317148	435.758	11.8989	439.22	10.8215	457	25.0734	4.64814	0.78812	0.000516628
ALX001_03core	Zana	0.0712744	0.00106694	0.549936	0.00894494	0.0559599	0.000355833	443.815	12.8339	444.932	11.6856	450.5	28.2461	1.48397	0.251155	0.000172338
ALX001_03rim	Zana	0.0683567	0.00100128	0.548419	0.00898674	0.0581875	0.000427243	426.234	12.0772	443.938	11.7515	536.5	32.139	20.5528	3.98792	0.00152747
ALX001_04core	Zana	0.0664995	0.000918225	0.534075	0.00896985	0.0582481	0.000556723	415.018	11.0952	434.488	11.8389	539	41.8134	23.0022	4.48109	0.00269718
ALX001_04rim	Zana	0.0631265	0.00114075	0.513313	0.00981219	0.0589751	0.000367263	394.599	13.8263	420.653	13.1241	566	27.1202	30.2829	6.19374	0.000560196
ALX001_05	Zana	0.0689251	0.00108963	0.536595	0.00953173	0.0564634	0.000457145	429.663	13.1354	436.155	12.5576	470.5	35.8383	8.67953	1.48844	0.00234593
ALX001_06	Zana	0.0683108	0.000972905	0.52027	0.00806869	0.055238	0.000338873	425.957	11.7357	425.31	10.7491	421.5	27.3903	-1.05738	-0.152117	0.000170069
ALX001_07	Zana	0.0701749	0.00102304	0.537086	0.00832567	0.0555086	0.000292318	437.195	12.3187	436.479	10.9695	432.5	23.4661	-1.08565	-0.164097	0.00027004
ALX001_08core	Zana	0.0684896	0.000943467	0.532743	0.00795238	0.0564147	0.000324215	427.036	11.3789	433.607	10.5085	468.5	25.4488	8.85047	1.51543	0.000587544
ALX001_08rim	Zana	0.0703373	0.000959756	0.546797	0.00854879	0.0563817	0.00043012	438.174	11.5553	442.874	11.1921	467	33.7933	6.17268	1.06125	0.00233697
DEX023-1	Zana	0.140489	0.00400808	1.62586	0.0478125	0.0839342	0.000597643	847.401	45.229	980.21	36.6424	1291	27.7074	34.3609	13.5491	0.00049775
DEX023-2RIM	Zana	0.0608873	0.00131904	0.570303	0.0189737	0.0679325	0.00171457	381.007	16.0197	458.187	24.3891	866	104.679	56.0038	16.8446	0.000996333
DEX023-2CORE	Zana	0.0804569	0.00194861	0.794353	0.0206857	0.0716059	0.000684505	498.833	23.2306	593.608	23.2761	974.5	38.9794	48.8113	15.9658	0.000556954
DEX023-3CORE	Zana	0.0811003	0.00180006	0.910539	0.0258057	0.0814282	0.00143429	502.671	21.4483	657.311	27.2447	1231.5	69.1355	59.1822	23.5262	0.00160178
DEX023-3RIM	Zana	0.0715818	0.00166298	0.580576	0.0142242	0.058824	0.000457198	445.664	19.9922	464.808	18.193	560.5	33.8783	20.4881	4.11861	0.00042641
DEX023-4CORE	Zana	0.0715818	0.00166298	0.580576	0.0142242	0.058824	0.000457198	445.664	19.9922	464.808	18.193	560.5	33.8783	20.4881	4.11861	0.00042641
DEX023-4RIM	Zana	0.0844797	0.00302251	0.746793	0.0290832	0.0641131	0.000984851	522.789	35.8819	566.333	33.5312	745	64.9498	29.8269	7.68876	0.000340365
DEX023-5CORE	Zana	0.0971518	0.00231983	4.82219	0.137717	0.359991	0.0056362	597.677	27.2311	1788.69	47.4735	3749.5	47.5689	84.0598	66.5857	0.0258106
DEX023-5RIM	Zana	0.0478498	0.00108161	0.618784	0.0286794	0.0937902	0.00379353	301.297	13.3009	489.06	35.6615	1503.5	152.887	79.9603	38.3926	0.00284001
DEX023-6	Zana	0.153503	0.00348948	1.57771	0.0379048	0.0745433	0.000578985	920.542	38.9422	961.419	29.6431	1056	31.2811	12.8275	4.25178	0.000134099
DEX023-7CORE	Zana	0.171595	0.00420074	1.79871	0.0464216	0.0760248	0.000620518	1020.86	46.1429	1044.94	33.4059	1095.5	32.6782	6.81351	2.30425	0.00353572
DEX023-7RIM	Zana	0.0776708	0.00168302	0.596191	0.0136477	0.0556706	0.000410571	482.189	20.1186	474.789	17.2888	439	32.8257	-9.83812	-1.55859	6.94459e-05
DEX023-8CORE	Zana	0.13144	0.00327145	2.01613	0.0680861	0.111247	0.00253787	796.05	37.2234	1120.9	45.3304	1819.5	82.8162	56.249	28.9811	0.00357454
DEX023-8RIM	Zana	0.0546849	0.0023416	0.694959	0.0430216	0.0921701	0.00411711	343.209	28.5918	535.748	50.8992	1470.5	169.594	76.6604	35.9383	0.00281732
DEX023-9	Zana	0.177635	0.00383809	1.93988	0.0441118	0.0792039	0.000560793	1054	41.95	1094.9	30.2429	1177	28.0095	10.4499	3.73532	9.70619e-05
DEX023-10CORE	Zana	0.199911	0.0044001	2.24778	0.0531934	0.0815484	0.000708304	1174.8	47.1903	1196.03	32.9896	1234.5	34.0747	4.83569	1.7748	0.00137803
DEX023-10RIM	Zana	0.0753625	0.00172346	0.595642	0.0146391	0.0573229	0.000515592	468.367	20.6458	474.44	18.5453	503.5	39.595	6.97766	1.27995	0.000149024
DEX023-11CORE	Zana	0.114692	0.00282956	1.35757	0.0517111	0.0858472	0.00249028	699.918	32.6849	870.779	44.0593	1334.5	112.203	47.552	19.6216	0.000661743
DEX023-11RIM	Zana	0.0695331	0.0014758	0.569374	0.0127845	0.0593887	0.000434762	433.328	17.7774	457.586	16.4753	581	31.8034	25.4168	5.30126	0.000337187
DEX023-12CORE	Zana	0.186466	0.00400179	1.99406	0.0451921	0.0775597	0.000564343	1102.17	43.4112	1113.44	30.4217	1135.5	28.9582	2.93539	1.01256	2.53913e-05
DEX023-12RIM	Zana	0.0417297	0.000982232	0.371451	0.00930912	0.0645586	0.000554969	263.537	12.1503	320.712	13.7371	759.5	36.2638	65.3012	17.8274	0.00098284
DEX023-12RIMA	Zana	0.0417297	0.000982232	0.371451	0.00930912	0.0645586	0.000554969	263.537	12.1503	320.712	13.7371	759.5	36.2638	65.3012	17.8274	0.00098284
DEX023-12RIMB	Zana	0.040995	0.000981519	0.359672	0.00899513	0.0636318	0.00045929	258.989	12.1501	311.954	13.3899	729	30.5989	64.4734	16.9784	0.000934213
DEX023-13	Zana	0.169463	0.00363074	1.73404	0.0392857	0.0742135	0.000546072	1009.12	39.9641	1021.2	28.9711	1047	29.6751	3.61791	1.18299	0.000377731
DEX023-14	Zana	0.0218413	0.00080888	0.530255	0.0239748	0.176078	0.00456269	139.278	10.2015	431.957	31.5682	2616	86.253	94.6759	67.7564	0.0100791
DEX023-15	Zana	0.0663402	0.00145526	0.522317	0.0122959	0.0571026	0.0004874	414.055	17.5825	426.676	16.336	495	37.6296	16.3525	2.95796	0.000148639
DEX023-16	Zana	0.178378	0.00446625	2.63303	0.0699428	0.107056	0.000948814	1058.07	48.772	1309.85	38.7226	1749.5	32.4534	39.5214	19.2215	0.00122349
DEX023-17	Zana	0.185762	0.00452505	1.98417	0.0503055	0.0774677	0.000543876	1098.34	49.1058	1110.08	33.9464	1133	27.9533	3.05895	1.05782	3.17064e-05
DEX023-18	Zana	0.19097	0.00417666	2.04382	0.0471736	0.0776204	0.000571971	1126.59	45.1338	1130.18	31.2301	1137	29.321	0.915419	0.317393	3.29833e-05
DEX023-19CORE	Zana	0.136326	0.00350914	1.43173	0.0406713	0.0761695	0.00091441	823.826	39.7524	902.226	33.6825	1099.5	48.0306	25.0727	8.68962	0.000809192
DEX023-19RIM	Zana	0.0608664	0.0013909	0.485879	0.0116178	0.0578961	0.000407002	380.88	16.8922	402.078	15.8156	525.5	30.8282	27.5205	5.27209	0.000332327
DEX023-20	Zana	0.171132	0.00372826	1.78877	0.0440368	0.0758096	0.000868546	1018.31	40.9773	1041.33	31.8151	1090	45.9035	6.57708	2.21029	0.00124518
DEX023-21CORE	Zana	0.158027	0.00375149	1.73478	0.0530162	0.0796178	0.00153147	945.775	41.6981	1021.48	38.9896	1187.5	75.9695	20.3558	7.41086	0.00275437
DEX023-21RIM	Zana	0.0274689	0.0007053	1.05948	0.103859	0.279738	0.0264546	174.682	8.84689	733.532	99.9071	3361	295.387	94.8027	76.1862	0.0145001
DEX023-22	Zana	0.0937945	0.00490425	1.03825	0.0553034	0.0802833	0.000812709	577.921	57.6765	723.011	54.3632	1203.5	39.8966	51.98	20.0675	0.000945215
DEX023-23CORE	Zana	0.198628	0.0043419	2.37908	0.0551979	0.0868693	0.000674881	1167.91	46.617	1236.27	32.9033	1357.5	29.9516	13.9663	5.5297	0.000244422
DEX023-24CORE	Zana	0.206596	0.00444297	2.71639	0.0970482	0.0953604	0.00271951	1210.62	47.3857	1332.88	52.3473	1535	107.335	21.1323	9.17257	0.00203274
DEX023-24RIM	Zana	0.0607971	0.00160643	0.502231	0.014159	0.0599128	0.000588295	380.459	19.509	413.191	19.05	600	42.5232	36.5902	7.92173	0.000315816
DEX023-25CORE	Zana	0.127733	0.00299413	1.3404	0.0329463	0.0761084	0.000562174	774.893	34.184	863.36	28.3867	1097.5	29.5673	29.3947	10.2469	0.000239344
DEX023-27CORE	Zana	0.0369196	0.00168562	1.03803	0.0572896	0.203917	0.00631558	233.703	20.9409	722.901	56.2949	2857.5	100.814	91.8214	67.6715	0.012088
DEX023-27RIM	Zana	0.0437681	0.00113334	0.383097	0.0106063	0.0634819	0.000621286	276.138	13.9912	329.297	15.5127	724	41.5229	61.8594	16.1432	0.000945573
DEX023-25RIM	Zana	0.0650538	0.00392107	1.42394	0.112511	0.158751	0.00809977	406.274	47.3771	898.967	92.1347	2442	172.787	83.3631	54.8066	0.00649026
DEX023-26CORE	Zana	0.0780915	0.00166416	0.681187	0.0160164	0.0632646	0.000628067	484.705	19.8856	527.465	19.2542	717	42.163	32.3982	8.10658	0.000332443
DEX023-26RIM	Zana	0.0668811	0.00141272	0.54157	0.0122618	0.0587286	0.000478327	417.325	17.0603	439.437	16.0882	557	35.5219	25.0764	5.03199	0.000628212
DEX023-28	Zana	0.163799	0.00346122	1.70971	0.0387395	0.0757025	0.000618632	977.824	38.286	1012.13	28.8259	1087	32.7589	10.0438	3.38913	0.000475792
DEX023-29	Zana	0.12839	0.00345959	1.6839	0.0523526	0.0951228	0.00147403	778.646	39.4671	1002.41	39.2291	1530.5	58.3522	49.1247	22.3223	0.00145784
DEX023-30INNERCORE	Zana	0.0621549	0.00169685	0.51775	0.018455	0.0604149	0.00138374	388.704	20.5799	423.626	24.5429	618	98.8917	37.1028	8.24345	0.000312269
DEX023-30OUTERCORE	Zana	0.180662	0.00417513	2.11552	0.0550173	0.0849277	0.00101221	1070.56	45.5106	1153.82	35.5467	1313.5	46.2397	18.496	7.21636	0.000684299
DEX023-30RIM	Zana	0.0508861	0.00382821	0.516968	0.0470723	0.0736823	0.00377226	319.949	46.8797	423.102	62.0546	1032.5	206.925	69.0122	24.3802	0.00122121
DEX023-31CORE	Zana	0.0849397	0.00250896	1.2195	0.0391783	0.104129	0.00131408	525.523	29.7797	809.508	35.5322	1698.5	46.5096	69.0596	35.0811	0.00206784
DEX023-31RIM	Zana	0.0582322	0.00193122	0.524514	0.0232645	0.065327	0.00192265	364.854	23.5066	428.141	30.7544	784.5	123.651	53.4922	14.7818	0.000603154
DEX023_33CORE	Zana	0.0659127	0.00187276	0.525952	0.016403	0.0578729	0.000743467	411.471	22.6315	429.098	21.7119	524.5	56.3489	21.5499	4.10793	0.000113862
DEX023_33RIM	Zana	0.0637869	0.00137128	0.508301	0.0115836	0.0577946	0.00043658	398.602	16.6084	417.285	15.5357	521.5	33.1516	23.5663	4.47719	0.000273026
DEX023_34RIM	Zana	0.160887	0.00354339	1.59132	0.0368351	0.0717356	0.000510495	961.676	39.2917	966.767	28.6622	978	29.0049	1.66915	0.526591	0.000114751
DEX023_35	Zana	0.098166	0.00235158	0.935996	0.0233849	0.069153	0.000490098	603.633	27.578	670.75	24.3815	903	29.221	33.1525	10.0063	0.00027503
DEX023_36	Zana	0.0709993	0.00152759	0.542954	0.0122884	0.0554635	0.000389095	442.159	18.3756	440.348	16.1086	430.5	31.2739	-2.70831	-0.411321	5.77281e-05
DEX023_36	Zana	0.13001	0.00277504	1.26522	0.02841	0.0705812	0.000491582	787.896	31.6219	830.209	25.3098	945	28.5297	16.6247	5.09661	7.00923e-05
DEX023_37	Zana	0.123643	0.00262889	1.17722	0.026493	0.0690537	0.000508794	751.474	30.128	789.978	24.5605	900	30.3941	16.5029	4.87407	0.000121982
DEX023-38RIM	Zana	0.0577813	0.00128546	0.466541	0.0109389	0.05856	0.000433137	362.107	15.6579	388.777	15.0904	550.5	32.2975	34.2222	6.86006	0.000464853
DEX023-39	Zana	0.153897	0.00347112	1.80022	0.0425979	0.0848385	0.000606412	922.741	38.7244	1045.48	30.6586	1311.5	27.7386	29.6423	11.7402	0.000147853
DEX023-40CORE	Zana	0.227706	0.005084	2.95786	0.0692864	0.0942111	0.000666851	1322.42	53.278	1396.79	35.2413	1512	26.7244	12.5384	5.32466	0.000234802
DEX023-40RIM	Zana	0.0720518	0.00158571	0.556376	0.0128642	0.0560044	0.000396584	448.491	19.0555	449.142	16.7154	452.5	31.4417	0.88601	0.144974	0.000116085
DEX023-41REAL	Zana	0.0649007	0.0015578	0.504867	0.0126585	0.0564191	0.000408385	405.347	18.846	414.971	17.0099	468.5	32.0557	13.4797	2.31906	9.40238e-05
DEX023-40COREREAL	Zana	0.129699	0.00339734	1.47957	0.0414705	0.0827361	0.000824384	786.125	38.7131	922.006	33.6818	1262.5	38.9395	37.7327	14.7375	0.000272201
DEX023-43CORE	Zana	0.191684	0.00470152	2.66524	0.0685599	0.100844	0.000780936	1130.45	50.764	1318.81	37.6335	1639.5	28.7515	31.0489	14.2823	0.000308173
DEX023-44	Zana	0.209951	0.00478999	2.42755	0.057943	0.0838588	0.000587619	1228.52	50.9381	1250.73	34.0417	1289	27.2784	4.69238	1.77618	8.52036e-05
DEX023-45RIM	Zana	0.076167	0.00167188	0.599285	0.0139161	0.0570643	0.000431964	473.188	20.0135	476.755	17.5933	494	33.3705	4.21296	0.74827	0.000231816
DEX023_46	Zana	0.0725561	0.00158367	0.556657	0.0127744	0.0556432	0.000393909	451.522	19.0221	449.326	16.5962	438	31.5132	-3.08732	-0.488937	8.91568e-05
DEX023_47	Zana	0.168829	0.00377237	1.6894	0.0395976	0.0725745	0.000513201	1005.62	41.543	1004.48	29.6807	1002	28.7111	-0.361409	-0.113207	0.000221266
DEX023_48RIM	Zana	0.0532627	0.00197826	0.426274	0.016494	0.0580449	0.000628505	334.511	24.1921	360.509	23.3487	531	47.4421	37.0036	7.21155	0.000342686
DEX023_48CORE	Zana	0.10524	0.00266378	1.00539	0.026843	0.0692877	0.000587893	645.021	31.0351	706.509	27.0009	907	34.962	28.8841	8.70313	0.000697832
DEX023_49CORE	Zana	0.0772994	0.00198933	0.913563	0.0437392	0.0857158	0.00345905	479.967	23.7851	658.917	45.8933	1331.5	156.16	63.9529	27.1581	0.00137382
DEX023_49RIM	Zana	0.0976527	0.00253406	1.55955	0.117308	0.115828	0.00817431	600.619	29.7293	954.241	90.9985	1892.5	253.932	68.2632	37.0579	0.00306784
DEX023_50CORE	Zana	0.132041	0.00407605	1.45269	0.0501338	0.0797923	0.00122998	799.474	46.3373	910.939	41.089	1191.5	60.8551	32.9019	12.2363	0.000654377
DEX023_50RIM	Zana	0.041445	0.00136092	0.612074	0.0223476	0.10711	0.00170795	261.775	16.8363	484.843	27.957	1750.5	58.3796	85.0457	46.0083	0.00454145
DEX023_51	Zana	0.08414	0.0021225	0.737656	0.0193568	0.0635843	0.000458976	520.77	25.2157	561.008	22.4957	727.5	30.6071	28.4165	7.17252	0.000191995
DEX023_52RIM	Zana	0.151727	0.00465579	1.62001	0.0521456	0.0774378	0.00075172	910.61	52.0117	977.946	40.019	1132	38.6609	19.5574	6.88547	0.000555324
DEX023_01	Zana	0.0719509	0.00108225	0.553818	0.0085999	0.055825	0.000215187	447.884	13.0097	447.472	11.2081	445	17.1403	-0.648154	-0.0921771	7.4648e-05
DEX023_02	Zana	0.0743525	0.0018435	0.635803	0.0162128	0.0620192	0.000368921	462.31	22.1034	499.679	20.0273	674.5	25.4417	31.4589	7.47865	0.000309434
DEX023_03	Zana	0.0606196	0.00117211	0.535764	0.0119667	0.0641001	0.000716324	379.381	14.2397	435.606	15.7616	744.5	47.2557	49.0422	12.9074	0.000844288
DEX023_04	Zana	0.102743	0.00802466	1.10644	0.0892943	0.0781042	0.00157994	630.441	93.4784	756.419	84.3076	1149.5	80.337	45.1552	16.6545	0.00103947
DEX023_05	Zana	0.0707343	0.00113812	0.577711	0.0112417	0.0592351	0.000647981	440.564	13.6966	462.966	14.4179	575.5	47.5649	23.4467	4.83875	0.000413702
DEX023_06	Zana	0.0728591	0.000965451	0.603294	0.0119809	0.0600543	0.000888087	453.343	11.5965	479.298	15.1181	605.5	63.9709	25.1291	5.41509	0.000312686
DEX023_07	Zana	0.128514	0.00654106	1.2165	0.063554	0.0686534	0.000806127	779.356	74.5109	808.133	57.4063	888	48.5279	12.2346	3.56094	0.000166896
DEX023_08	Zana	0.0724488	0.00101752	0.579632	0.00869423	0.0580256	0.000305409	450.878	12.2263	464.202	11.146	530.5	23.0607	15.0089	2.87027	0.000238124
EQU002_01	Zana	0.156296	0.00557135	1.67233	0.0630736	0.0776022	0.000954733	936.128	61.97	998.021	47.3718	1136.5	48.9584	17.6306	6.20162	0.000354727
EQU002_02	Zana	0.104276	0.00334396	0.986931	0.0336586	0.0686436	0.000795678	639.4	38.9817	697.118	34.1113	888	47.8988	27.9955	8.27951	-0.000473853
EQU002_04	Zana	0.0872339	0.00400333	0.75538	0.0365803	0.0628028	0.000968972	539.14	47.3843	571.312	41.882	701.5	65.6905	23.1447	5.63131	0.000242534
EQU002_03	Zana	0.0688456	0.000891185	0.564316	0.00895099	0.0594489	0.000544772	429.183	10.745	454.308	11.5863	583.5	39.7882	26.4467	5.53039	0.000340623
EQU002_05	Zana	0.0611231	0.000684568	0.631272	0.0137588	0.0749048	0.00140028	382.44	8.31467	496.863	17.0556	1065.5	75.1898	64.107	23.029	0.00164058
EQU002_06	Zana	0.071125	0.000898262	0.605025	0.0133502	0.0616949	0.00111605	442.916	10.8072	480.393	16.8207	663.5	77.5031	33.2456	7.80141	0.000423478
EQU002_06	Zana	0.117926	0.00232647	1.2267	0.0273887	0.0754443	0.000788271	718.592	26.802	812.793	24.8251	1080	41.9317	33.4637	11.5898	0.000431313
EQU002_07	Zana	0.100494	0.0026481	1.04996	0.0396374	0.0757759	0.00204737	617.285	30.9855	728.827	38.8894	1089	108.275	43.3164	15.3043	0.000555679
EQU002_08	Zana	0.106727	0.00140539	1.01706	0.0184095	0.0691151	0.000858113	653.69	16.3611	712.4	18.4496	902	51.1959	27.5288	8.24118	0.0001729
EQU002_09	Zana	0.0673062	0.000736555	0.560761	0.00773136	0.0604257	0.000506621	419.892	8.89407	451.999	10.0342	618.5	36.1953	32.1112	7.10325	0.000376793
EQU002_10	Zana	0.107994	0.00574859	1.16064	0.0633842	0.0779466	0.000947848	661.067	66.7166	782.218	58.7141	1145.5	48.3219	42.2901	15.4881	0.000528123
EQU002_11	Zana	0.100202	0.0029189	3.1398	0.241945	0.22726	0.0162051	615.575	34.159	1442.43	115.341	3032.5	228.626	79.7007	57.3237	0.01555
EQU002_12	Zana	0.0676809	0.000997187	0.550742	0.00956157	0.0590175	0.000541753	422.155	12.0356	445.46	12.4822	567.5	39.9676	25.6114	5.2317	0.000363071
EQU002_13	Zana	0.0706999	0.000793597	0.547172	0.00759556	0.0561311	0.000458289	440.357	9.55225	443.12	9.94478	457.5	36.2207	3.74718	0.623582	0.000202464
EQU002_14	Zana	0.0909177	0.00289048	0.855319	0.0310904	0.0682305	0.00120122	560.944	34.1143	627.532	33.7468	875.5	72.8934	35.9287	10.6112	0.000500907
EQU002_15	Zana	0.0693638	0.000814136	0.658429	0.0180226	0.0688454	0.00170208	432.308	9.81161	513.626	21.9487	894	102.07	51.6435	15.8323	0.00107442
EQU002_16	Zana	0.06967	0.000701989	0.608538	0.0135456	0.0633491	0.00125716	434.153	8.45809	482.613	17.0288	719.5	84.261	39.659	10.0412	0.000552706
EQU002_17	Zana	0.0707487	0.000716223	0.5654	0.00744406	0.0579609	0.000487791	440.651	8.62084	455.012	9.63367	528	36.8897	16.5434	3.15622	0.000302246
EQU002_18	Zana	0.0744656	0.000754789	0.572546	0.00743264	0.0557639	0.000452185	462.989	9.05346	459.636	9.57532	442.5	36.074	-4.63022	-0.729362	9.53307e-05
EQU002_19	Zana	0.0708462	0.000717119	0.572063	0.00757508	0.0585633	0.000499852	441.238	8.63083	459.324	9.76137	550.5	37.2722	19.8479	3.9377	0.000269835
EQU002_20	Zana	0.113742	0.00364792	1.38001	0.0472941	0.0879949	0.00106147	694.423	42.1584	880.397	39.9565	1382	46.3553	49.7523	21.1239	0.000932366
EQU002_23	Zana	0.163981	0.00224598	2.0484	0.037777	0.0905979	0.00111855	978.833	24.8528	1131.7	25.0102	1438	47.0764	31.9309	13.5081	0.000327103
EQU002_24	Zana	0.0943822	0.00529736	0.847431	0.050034	0.0651198	0.00119009	581.383	62.2552	623.207	54.2649	778	76.8555	25.2721	6.71101	0.000293228
EQU002_26	Zana	0.0567312	0.00224219	0.706164	0.0495215	0.0902781	0.0052261	355.704	27.3264	542.439	58.1009	1431	220.971	75.143	34.425	0.00197338
EQU002_27	Zana	0.0804746	0.00328222	0.72803	0.0365182	0.0656129	0.00191388	498.939	39.1046	555.368	42.4666	794	122.344	37.1614	10.1607	0.000185405
EQU002_28	Zana	0.0738546	0.000780503	0.595947	0.00821105	0.0585233	0.000517246	459.322	9.36711	474.634	10.4209	549	38.6055	16.3348	3.22613	0.000388054
EQU002_30	Zana	0.099265	0.00688005	0.95895	0.0695434	0.0700646	0.00148998	610.08	80.4392	682.718	70.8391	930	87.3105	34.4	10.6394	0.000344906
EQU002_31	Zana	0.0733263	0.000801434	0.577789	0.00799786	0.0571489	0.000485297	456.15	9.62294	463.016	10.2675	497	37.4204	8.21937	1.48294	-0.000354213
EQU002_32	Zana	0.0784779	0.00203082	0.656239	0.0190977	0.0606475	0.000806783	487.015	24.2542	512.285	23.2811	626.5	57.3503	22.2641	4.93271	0.000212345
EQU002_32	Zana	0.196276	0.0027754	2.32733	0.0393653	0.0859979	0.000797902	1155.25	29.8762	1220.6	23.8836	1338	35.8682	13.6585	5.35407	0.000628765
EQU002_33	Zana	0.0751271	0.00075657	0.580336	0.00753526	0.056025	0.000459082	466.956	9.06924	464.654	9.65947	453	36.3853	-3.08073	-0.49544	0.00830827
EQU002_34	Zana	0.129943	0.00452581	1.28807	0.047466	0.0718927	0.000864027	787.518	51.5354	840.4	41.695	982.5	48.9495	19.8455	6.29253	0.000292091
EQU002_35	Zana	0.0762518	0.000847161	0.600772	0.00837834	0.0571424	0.000481553	473.696	10.1441	477.7	10.6006	497	37.1317	4.6889	0.838055	0.000103798
EQU002_36	Zana	0.0683773	0.000969292	0.615626	0.0127746	0.0652985	0.000989245	426.358	11.6914	487.077	15.9931	783.5	63.6616	45.5829	12.466	0.000729129
EQU002_39	Zana	0.0740973	0.00084425	0.776479	0.0291151	0.0760021	0.00271458	460.779	10.1296	583.443	33.0112	1095	143.004	57.9198	21.0243	0.0014696
EQU002_38	Zana	0.064921	0.000690064	0.577015	0.00824081	0.0644614	0.000614742	405.47	8.35151	462.518	10.5838	756.5	40.2464	46.4018	12.334	0.000815222
EQU002_40	Zana	0.0772363	0.000848388	0.623979	0.00893953	0.0585932	0.000538789	479.59	10.1495	492.313	11.1476	552	40.1378	13.1178	2.58445	0.000299132
EQU002_37	Zana	0.0789315	0.00107138	0.624461	0.0100979	0.0573791	0.000504121	489.726	12.7958	492.615	12.5838	506	38.6536	3.21621	0.586373	0.000211583
EQU002_22	Zana	0.0783494	0.00123062	0.866079	0.0531946	0.0801716	0.00475928	486.247	14.7045	633.404	57.0765	1201	234.019	59.5131	23.2327	0.00141019
EQU002_29	Zana	0.100633	0.00224962	1.04363	0.0344646	0.0752146	0.00182746	618.099	26.3244	725.684	33.9604	1074	97.5893	42.4489	14.8253	0.000482234
EQU002_41	Zana	0.0749648	0.000891731	0.655174	0.0103758	0.0633866	0.000662526	465.983	10.6904	511.632	12.6899	721	44.3635	35.3699	8.92216	0.000717973
EQU002_53	Zana	0.0766506	0.000799564	0.623013	0.00845143	0.0589494	0.000511107	476.084	9.57086	491.709	10.5467	565	37.766	15.7373	3.17758	0.000337034
EQU002_43	Zana	0.0769751	0.000802459	0.62565	0.00848414	0.0589494	0.000511107	478.027	9.60261	493.357	10.5703	565	37.766	15.3935	3.10739	0.000337034
EQU002_44	Zana	0.0930352	0.00289674	0.848036	0.0317372	0.0661098	0.00137157	573.444	34.122	623.539	34.5774	809.5	86.8152	29.1607	8.03394	0.000161965
EQU002_45	Zana	0.0768048	0.000851796	0.647116	0.012899	0.0611072	0.00101192	477.007	10.1944	506.676	15.8407	643	71.1876	25.8154	5.85566	0.000243538
EQU002_46	Zana	0.0801495	0.000873167	0.618918	0.00850794	0.0560055	0.000469395	496.999	10.4177	489.144	10.6438	452.5	37.2143	-9.83398	-1.60583	0.000121117
EQU002_47	Zana	0.0747958	0.000849962	0.598814	0.00896457	0.0580648	0.00056575	464.969	10.1915	476.456	11.3542	532	42.6783	12.5998	2.41094	0.000239329
EQU002_48	Zana	0.118	0.00505834	1.10244	0.0502	0.0677595	0.00103875	719.02	58.1996	754.491	47.9164	861	63.6215	16.4901	4.70127	0.000132472
EQU002_49	Zana	0.0951937	0.0037385	0.820618	0.0343742	0.0625218	0.000909455	586.162	43.934	608.362	37.9825	692	62.0277	15.2946	3.64924	0.000158345
EQU002_50	Zana	0.0878767	0.00100307	0.774542	0.0110298	0.0639249	0.000544148	542.95	11.8819	582.336	12.5827	739	36.0229	26.5291	6.76343	0.000172835
EQU002_54	Zana	0.0936871	0.00248918	0.893924	0.0249535	0.0692021	0.000591757	577.288	29.3092	648.443	26.5804	904.5	35.2483	36.176	10.9732	0.000406688
EQU002_55	Zana	0.0790931	0.00230435	0.61911	0.0191094	0.0567711	0.000577888	490.692	27.5017	489.264	23.8264	482.5	44.9657	-1.69776	-0.291761	0.000412092
EQU002_56	Zana	0.0681744	0.000848583	0.647853	0.010957	0.0689213	0.00078896	425.134	10.238	507.131	13.4577	896	47.2515	52.552	16.1687	0.00115727
EQU002_57	Zana	0.0840188	0.00287099	0.704011	0.0261008	0.0607718	0.000872964	520.049	34.1	541.157	30.8684	631	61.8789	17.5833	3.90043	0.000110089
EQU002_58	Zana	0.0718213	0.000762644	0.560887	0.00758546	0.0566396	0.000474252	447.105	9.17021	452.08	9.84454	477.5	37.0172	6.36551	1.10063	8.78225e-05
EQU002_60	Zana	0.0721636	0.000791554	0.556733	0.00761648	0.0559535	0.000457345	449.163	9.51466	449.375	9.911	450.5	36.3042	0.296809	0.0472062	-5.62607e-05
EQU002_61	Zana	0.0700273	0.000929012	0.550975	0.00908829	0.057064	0.000559177	436.306	11.1885	445.612	11.8644	494	43.1981	11.6789	2.08835	0.00015906
EQU002_62	Zana	0.0534628	0.0081341	0.456664	0.0699139	0.0619504	0.00103533	335.735	99.1638	381.916	95.1969	672	71.5123	50.0394	12.0918	0.000998921
EQU002_25	Zana	0.162098	0.0019907	1.68113	0.0248444	0.0752181	0.000618156	968.395	22.0661	1001.36	18.7303	1074	33.0105	9.8329	3.29198	0.000122462
EQU002_63	Zana	0.107104	0.00603246	1.00476	0.0588871	0.0680385	0.00109928	655.889	70.0583	706.19	58.7886	869.5	66.9641	24.5671	7.12285	0.000274048
EQU002_64	Zana	0.0729344	0.000920949	0.567991	0.00860713	0.0564817	0.000473042	453.796	11.0614	456.691	11.1164	471	37.073	3.65272	0.634059	0.000115182
EQU002_65	Zana	0.0723506	0.000735402	0.564007	0.00736174	0.0565381	0.000462862	450.287	8.8384	454.108	9.53586	473.5	36.2185	4.90234	0.841402	0.000159323
EQU002_66	Zana	0.0877227	0.00372146	0.743962	0.0336516	0.0615088	0.000963631	542.037	44.0339	564.686	38.8106	657	67.1938	17.4982	4.01091	0.000187737
JKG006_002	Zana	0.0747395	0.000431273	0.00577035	0.570415	0.0553528	0.000278007	464.632	2.58622	458.26	2.81751	426.5	11.2004	-8.9406	-1.39041	6.46542e-05
JKG006_003	Zana	0.0603801	0.00165429	0.0273979	0.526344	0.0632229	0.00129518	377.924	10.0488	429.359	11.9105	715.5	43.5148	47.1804	11.9793	0.00078128
JKG006_003core	Zana	0.0682757	0.00100729	0.0147532	0.552271	0.0586658	0.000371781	425.745	6.07531	446.461	5.78427	554.5	13.8264	23.22	4.64003	0.000624739
JKG006_003b	Zana	0.101331	0.00180677	0.0178303	1.16724	0.0835441	0.00460298	622.185	10.5665	785.313	31.1911	1281.5	107.366	51.4487	20.7723	0.00163754
JKG006_004	Zana	0.0610562	0.00136879	0.0224186	0.562999	0.066877	0.000860906	382.033	8.31044	453.454	9.4124	833.5	26.832	54.1652	15.7503	0.001277
JKG006_005b	Zana	0.0714547	0.00122448	0.0171365	0.637859	0.0647429	0.00208582	444.899	7.36265	500.954	14.3307	765.5	67.8884	41.8812	11.1896	0.00114841
JKG006_005c	Zana	0.0678871	0.000806674	0.0118826	0.57097	0.0609992	0.000723134	423.4	4.86758	458.618	6.17593	639	25.5002	33.7402	7.67918	0.000665357
JKG006_005aCore	Zana	0.0605065	0.000935573	0.0154624	0.498701	0.0597774	0.000596358	378.693	5.6843	410.802	6.19884	595.5	21.6141	36.4076	7.81627	0.000581961
JKG006_005aRim	Zana	0.074658	0.00049122	0.0065796	0.566989	0.0550803	0.000291	464.143	2.94585	456.042	3.09549	415	11.8081	-11.8417	-1.77635	0.000199892
JKG006_006	Zana	0.0684855	0.000649265	0.00948033	0.562745	0.0595952	0.000516546	427.011	3.91585	453.288	4.68614	588.5	18.8041	27.4408	5.79706	0.00067041
JKG006_007b	Zana	0.0739897	0.000539918	0.00729721	0.559524	0.0548461	0.000264134	460.133	3.23984	451.193	3.18014	405.5	10.7815	-13.4729	-1.98125	0.000229786
JKG006_008	Zana	0.0702463	0.000389277	0.0055416	0.554876	0.0572889	0.000300099	437.625	2.34423	448.163	2.7594	502.5	11.5303	12.9103	2.35124	0.000496457
JKG006_009	Zana	0.0303074	0.000881697	0.0290918	0.506272	0.121153	0.00202922	192.466	5.51405	415.918	11.394	1973	29.8472	90.245	53.7251	0.0057553
JKG006_010a	Zana	0.0492877	0.00397708	0.0806912	0.608619	0.0895582	0.00757923	310.137	24.3867	482.664	43.9906	1416	161.827	78.0977	35.7448	0.0029454
JKG006_010b	Zana	0.0726102	0.000370437	0.00510172	0.553708	0.0553072	0.000270735	451.848	2.22588	447.4	2.55526	424.5	10.921	-6.44231	-0.994124	0.000197007
JKG006_010c	Zana	0.156988	0.00345766	0.022025	1.5596	0.0720518	0.000419692	939.986	19.2358	954.259	13.9985	987	11.8539	4.76332	1.49576	0.000332617
JKG006_010d	Zana	0.0738629	0.000680315	0.00921052	0.574033	0.0563649	0.000278347	459.372	4.08252	460.596	3.86264	466.5	10.9379	1.52805	0.265843	0.000131823
JKG006_011	Zana	0.0758351	0.00343357	0.570415	0.0043639	0.0553528	0.000278007	464.632	2.58622	458.26	2.81751	426.5	11.2004	-8.9406	-1.39041	6.46542e-05
JKG006_012aCore	Zana	0.0764961	0.000919215	0.526344	0.0180105	0.0632229	0.00129518	377.924	10.0488	429.359	11.9105	715.5	43.5148	47.1804	11.9793	0.00078128
JKG006_012aRim	Zana	0.0750267	0.000694402	0.552271	0.00886841	0.0586658	0.000371781	425.745	6.07531	446.461	5.78427	554.5	13.8264	23.22	4.64003	0.000624739
JKG006_012b	Zana	0.0684189	0.000597373	1.16724	0.0676111	0.0835441	0.00460298	622.185	10.5665	785.313	31.1911	1281.5	107.366	51.4487	20.7723	0.00163754
JKG006_012c	Zana	0.0733945	0.000308879	0.562999	0.0145568	0.066877	0.000860906	382.033	8.31044	453.454	9.4124	833.5	26.832	54.1652	15.7503	0.001277
JKG006_013	Zana	0.0586816	0.00206307	0.637859	0.0232812	0.0647429	0.00208582	444.899	7.36265	500.954	14.3307	765.5	67.8884	41.8812	11.1896	0.00114841
JKG006_014	Zana	0.0697419	0.00122361	0.57097	0.00958482	0.0609992	0.000723134	423.4	4.86758	458.618	6.17593	639	25.5002	33.7402	7.67918	0.000665357
JKG006_015	Zana	0.0694134	0.00192967	0.498701	0.00917792	0.0597774	0.000596358	378.693	5.6843	410.802	6.19884	595.5	21.6141	36.4076	7.81627	0.000581961
JKG006_016a	Zana	0.0659287	0.00134365	0.566989	0.00478465	0.0550803	0.000291	464.143	2.94585	456.042	3.09549	415	11.8081	-11.8417	-1.77635	0.000199892
JKG006_016b	Zana	0.102982	0.0064485	0.562745	0.00722933	0.0595952	0.000516546	427.011	3.91585	453.288	4.68614	588.5	18.8041	27.4408	5.79706	0.00067041
JKG006_17core	Zana	0.0491816	0.00260799	0.559524	0.00489228	0.0548461	0.000264134	460.133	3.23984	451.193	3.18014	405.5	10.7815	-13.4729	-1.98125	0.000229786
JKG006_17rim	Zana	0.0479435	0.000261297	0.554876	0.00423148	0.0572889	0.000300099	437.625	2.34423	448.163	2.7594	502.5	11.5303	12.9103	2.35124	0.000496457
JKG006_18a	Zana	0.0502948	0.00192446	0.506272	0.0169986	0.121153	0.00202922	192.466	5.51405	415.918	11.394	1973	29.8472	90.245	53.7251	0.0057553
JKG006_18b	Zana	0.0468412	0.000685738	0.608619	0.0712275	0.0895582	0.00757923	310.137	24.3867	482.664	43.9906	1416	161.827	78.0977	35.7448	0.0029454
JKG006_19	Zana	0.0629439	0.00165513	0.553708	0.0039151	0.0553072	0.000270735	451.848	2.22588	447.4	2.55526	424.5	10.921	-6.44231	-0.994124	0.000197007
JKG006_20	Zana	0.0702481	0.000292597	1.5596	0.035534	0.0720518	0.000419692	939.986	19.2358	954.259	13.9985	987	11.8539	4.76332	1.49576	0.000332617
JKG006_021	Zana	0.0714278	0.000678027	0.574033	0.00599952	0.0563649	0.000278347	459.372	4.08252	460.596	3.86264	466.5	10.9379	1.52805	0.265843	0.000131823
JKG006_022	Zana	0.074405	0.000527938	0.709729	0.0382097	0.0678767	0.00197471	471.2	20.5406	544.558	22.4412	864.5	60.3387	45.4945	13.4711	0.000633928
JKG006_023	Zana	0.0731606	0.000393965	0.581724	0.00759397	0.0551539	0.000281197	475.159	5.50204	465.545	4.86301	418	11.389	-13.6744	-2.06505	0.000411623
JKG006_024	Zana	0.0741905	0.000395653	0.580755	0.00630941	0.0561404	0.000319314	466.354	4.16252	464.923	4.04452	457.5	12.6184	-1.93533	-0.3078	9.50509e-05
JKG006_025	Zana	0.0607722	0.00179071	0.549913	0.00593926	0.058293	0.000370508	426.609	3.60318	444.917	3.88331	540.5	13.9007	21.0714	4.11485	0.000312659
JKG006_026a	Zana	0.0636446	0.000427596	0.570283	0.00397984	0.0563541	0.000313698	456.559	1.85469	458.174	2.57008	466	12.3309	2.02589	0.352429	0.000241978
JKG006_026b	Zana	0.0372486	0.00118377	0.648693	0.0468776	0.0801744	0.00505896	367.591	12.5496	507.648	28.4663	1201	124.377	69.393	27.5895	0.0026842
JKG006_27a	Zana	0.0698781	0.000663573	0.684666	0.0312529	0.0712006	0.00299961	434.586	7.36921	529.564	18.6633	963	86.0415	54.8716	17.9351	0.00153489
JKG006_27b	Zana	0.0745506	0.000629372	0.568333	0.0186528	0.0593824	0.00103516	432.606	11.6212	456.912	12.0045	581	37.8617	25.5411	5.3196	0.00053718
JKG006_28	Zana	0.0737652	0.00115832	0.54343	0.0129202	0.0597816	0.000731518	411.568	8.12063	440.661	8.46407	595.5	26.5128	30.8871	6.60234	0.000593773
JKG006_29a	Zana	0.0721431	0.000369635	1.02004	0.0656455	0.071838	0.00106301	631.842	37.5775	713.898	32.4705	981	30.1403	35.5921	11.4941	0.000825439
JKG006_29bcore	Zana	0.0260423	0.0017833	0.523974	0.0406551	0.0772691	0.00437201	309.485	16.0037	427.781	26.731	1128	112.719	72.5634	27.6534	0.00176122
JKG006_29brim	Zana	0.0260562	0.0017833	0.508138	0.00469112	0.076869	0.000572738	301.874	1.60711	417.175	3.15333	1117.5	14.8673	72.9867	27.6387	0.00280972
JKG006_30a	Zana	0.0719724	0.000358242	0.61971	0.0287056	0.0893642	0.00233069	316.321	11.8006	489.641	17.8368	1411.5	49.9113	77.5897	35.3972	0.00304453
JKG006_30brim	Zana	0.0544653	0.00151615	0.553809	0.0231042	0.0857493	0.0033491	295.09	4.22123	447.466	14.9862	1332.5	75.5487	77.8544	34.0532	0.0028979
JKG006_032	Zana	0.0732576	0.000405631	0.53258	0.0206233	0.0613662	0.00174351	393.492	10.0297	433.498	13.5718	652	60.9795	39.6485	9.22879	0.000979781
JKG006_033	Zana	0.0749936	0.000566236	0.59005	0.00612118	0.0609189	0.00057876	437.636	1.7621	470.875	3.9012	636	20.4477	31.1893	7.05902	0.000674193
JKG006_033bCore	Zana	0.172293	0.0101544	0.559229	0.00618283	0.0567833	0.000321768	444.738	4.07804	451.002	4.01814	483	12.5145	7.92178	1.38888	0.000697267
JKG006_033bRim	Zana	0.0878356	0.00193626	0.581474	0.00505213	0.0566796	0.000284165	462.625	3.16674	465.385	3.23838	479	11.0797	3.41853	0.592913	0.000387514
JKG006_033c	Zana	0.0732508	0.000539033	0.567321	0.00410582	0.0562406	0.000271906	455.154	2.36601	456.257	2.65633	461.5	10.7182	1.37499	0.241709	0.000411661
JKG006_033d	Zana	0.0639338	0.000415731	0.581083	0.00632872	0.0568052	0.00053939	461.338	2.37387	465.133	4.05603	483.5	20.972	4.58366	0.816	0.000336688
JKG006_033e	Zana	0.0609992	0.00165449	0.544158	0.0183067	0.0649409	0.00105335	380.308	10.8728	441.14	11.9664	772	34.1425	50.7373	13.7898	0.00105964
JKG029_001Core	Zana	0.106995	0.00688044	1.04752	0.0693752	0.0710061	0.00112035	655.254	39.9419	727.616	33.832	957.5	32.2502	31.5662	9.94516	0.00170146
JKG029_001Rim	Zana	0.170464	0.00312462	1.74332	0.0350996	0.0741724	0.000617407	1014.64	17.1856	1024.64	12.9083	1046	16.7867	2.99841	0.976457	0.00088104
JKG029_002Rim	Zana	0.0592281	0.0021013	0.488976	0.0186058	0.0598767	0.000822332	370.918	12.7753	404.192	12.6087	599	29.7386	38.0772	8.23228	0.00227278
JKG029_002Core	Zana	0.0719824	0.00134377	0.571178	0.0118934	0.0575498	0.000530526	448.073	8.0755	458.753	7.65686	512.5	20.2565	12.5711	2.32794	0.00060358
JKG029_002b	Zana	0.107338	0.00398642	1.30935	0.0653573	0.0884709	0.00294823	657.247	23.1647	849.796	28.336	1392.5	63.9318	52.8009	22.6583	0.00292378
JKG029_002c	Zana	0.0889203	0.00410706	1.78975	0.149325	0.145979	0.0101348	549.13	24.2673	1041.68	52.9423	2299	119.31	76.1144	47.2842	0.00803879
JKG029_004	Zana	0.083011	0.00341964	0.716078	0.0308035	0.0625638	0.000773357	514.054	20.322	548.321	18.0635	693	26.356	25.822	6.24954	0.000966786
JKG029_005a	Zana	0.0861784	0.0044856	0.857123	0.052035	0.0721346	0.00225066	532.879	26.5661	628.519	28.0575	989.5	63.4662	46.1467	15.2168	0.00104667
JKG029_005b	Zana	0.0646114	0.00303414	0.795882	0.0781452	0.0893383	0.00769759	403.596	18.3455	594.473	43.2464	1411	164.897	71.3964	32.1086	0.00466068
JKG029_005c	Zana	0.104144	0.00421357	0.963819	0.041947	0.0671211	0.00107474	638.629	24.5528	685.238	21.459	841.5	33.326	24.1083	6.8019	0.00102024
JKG029_006Core	Zana	0.0712313	0.00131181	0.582497	0.0132014	0.0593091	0.000783048	443.556	7.88905	466.041	8.43487	578	28.6946	23.2603	4.82481	0.0152324
JKG029_006Rim	Zana	0.0554832	0.00219599	0.488631	0.0223671	0.0638731	0.00146717	348.087	13.3977	403.957	15.1422	737	48.6254	52.7698	13.8307	0.00179948
JKG029_007a	Zana	0.1199	0.00484024	1.29577	0.0553171	0.0783807	0.00108641	729.962	27.8007	843.81	24.1745	1156.5	27.4956	36.8818	13.4921	0.00833551
JKG029_007bCore	Zana	0.117782	0.00407437	1.42811	0.0547142	0.0879392	0.00144649	717.761	23.454	900.715	22.6252	1381	31.6053	48.026	20.3121	0.00429562
JKG029_007bRim	Zana	0.0492935	0.000961036	0.402754	0.0144365	0.0592582	0.00178181	310.173	5.9013	343.626	10.3959	576.5	65.3554	46.1973	9.73535	0.00188943
JKG029_009	Zana	0.0717196	0.0013613	0.575481	0.0128819	0.0581958	0.000690174	446.493	8.1828	461.53	8.26808	537	25.9508	16.8542	3.25803	0.000640947
JKG029_010Core	Zana	0.167323	0.00395147	2.19662	0.0676575	0.0952136	0.00188166	997.31	21.784	1179.91	21.2655	1532	37.2074	34.9014	15.4758	0.0299609
JKG029_010Rim	Zana	0.0711393	0.00154642	0.590022	0.020841	0.0601529	0.00167406	443.002	9.29976	470.858	13.2218	609	60.1604	27.2575	5.916	0.00189897
JKG029_11core	Zana	0.0340682	0.00122374	0.607452	0.024823	0.129319	0.00251683	215.953	7.62408	481.928	15.5594	2088.5	34.2235	89.6599	55.1898	0.0174391
JKG029_011rim	Zana	0.0716627	0.00162372	0.580639	0.0149125	0.058764	0.000710117	446.151	9.75951	464.848	9.53419	558	26.3511	20.0447	4.02234	0.00637382
JKG029_013Core	Zana	0.0716627	0.00162372	0.580639	0.0149125	0.058764	0.000710117	446.151	9.75951	464.848	9.53419	558	26.3511	20.0447	4.02234	0.00637382
JKG029_013Rim	Zana	0.084297	0.00245698	1.35853	0.095726	0.116885	0.00749488	521.703	14.5904	871.195	40.395	1909	115.122	72.6714	40.1164	0.133524
JKG029_014	Zana	0.0424512	0.00150392	0.362079	0.0154225	0.0618603	0.00146148	268	9.29307	313.75	11.4317	669	50.5692	59.9402	14.5816	0.00688456
JKG029_015acore	Zana	0.165497	0.0058316	3.26244	0.384155	0.142972	0.016055	987.222	32.1734	1472.07	87.6158	2263.5	193.674	56.3852	32.9365	0.12657
JKG029_017	Zana	0.0472457	0.000972133	0.42368	0.0195372	0.065039	0.00268314	297.58	5.98108	358.661	13.8387	775.5	86.7757	61.6273	17.0302	0.016672
JKG029_018a	Zana	0.0494625	0.000918037	0.437017	0.0146756	0.0640797	0.00179276	311.211	5.63648	368.128	10.3165	744	59.1529	58.1706	15.4612	0.00217146
JKG029_019	Zana	0.048972	0.000956067	0.418644	0.0122711	0.0620005	0.00135505	308.197	5.8726	355.063	8.7447	674	46.7387	54.2734	13.1992	0.00917608
JKG029_020aCore	Zana	0.0741243	0.00144761	0.598837	0.0127869	0.0585932	0.000505526	460.941	8.68179	476.472	8.08793	552	18.8299	16.4963	3.25957	0.000374893
JKG029_020aInner	Zana	0.193733	0.00364743	2.22413	0.047294	0.0832636	0.000822519	1141.53	19.6662	1188.61	14.7855	1275	19.2674	10.4683	3.96111	0.00538166
JKG029_020b	Zana	0.0812773	0.00302725	0.810263	0.0345141	0.0723028	0.00149271	503.726	18.0222	602.571	19.1759	994	41.9709	49.3233	16.4038	0.00295698
JKG029_020c	Zana	0.0715028	0.00129862	0.580167	0.0118061	0.0588475	0.000539822	445.189	7.80785	464.545	7.55776	561	19.9941	20.6437	4.16668	0.000390499
JKG029_021inner	Zana	0.064452	0.00423811	1.06974	0.168281	0.120377	0.0171846	402.631	25.6146	738.578	79.3671	1961.5	254.74	79.4733	45.4856	0.00893004
JKG029_022	Zana	0.064452	0.00423811	1.06974	0.168281	0.120377	0.0171846	402.631	25.6146	738.578	79.3671	1961.5	254.74	79.4733	45.4856	0.00893004
JKG029_023a	Zana	0.0640265	0.00119457	0.536165	0.0124803	0.0607348	0.000844938	400.053	7.23302	435.871	8.21555	629.5	29.9745	36.449	8.21745	0.00208012
JKG029_023b	Zana	0.0553178	0.00219473	0.462051	0.0190057	0.0605792	0.000656217	347.076	13.3921	385.664	13.1136	624	23.3604	44.3788	10.0055	0.0018661
JKG029_024a	Zana	0.076367	0.00166986	0.628271	0.014915	0.0596677	0.000551087	474.386	9.99279	494.993	9.2581	591.5	20.0237	19.7995	4.16311	0.000522183
JKG029_024b	Zana	0.143077	0.00514951	1.42172	0.0532327	0.0720682	0.000742566	862.011	28.9746	898.04	22.0766	987.5	20.9666	12.7078	4.01195	0.000810568
JKG029_024c	Zana	0.068451	0.00140389	0.683022	0.0318633	0.0723691	0.00303128	426.803	8.4644	528.573	19.0428	996	85.1215	57.1483	19.2537	0.00226843
JKG029_028	Zana	0.0775479	0.00159013	0.662533	0.0148808	0.0619634	0.000567528	481.454	9.50562	516.136	9.04747	672.5	19.5939	28.4083	6.71942	0.000873896
JKG029_029	Zana	0.067351	0.00241621	0.724502	0.0710758	0.0780178	0.00711968	420.163	14.5761	553.293	41.0077	1147	181.306	63.3685	24.0614	0.00233642
JKG029_030	Zana	0.04455	0.000838771	0.335107	0.00696262	0.054555	0.00047908	280.965	5.17421	293.443	5.28122	394	19.6954	28.689	4.25202	0.00087014
JKG029_030	Zana	0.0679974	0.00194889	0.670121	0.0351801	0.0714758	0.00314223	424.066	11.7524	520.76	21.1652	971	89.6696	56.3269	18.5678	0.00300319
JKG029_031	Zana	0.0780981	0.00390767	0.849255	0.0463867	0.0788672	0.00172448	484.745	23.3227	624.209	25.1544	1168.5	43.3047	58.5156	22.3425	0.00305669
JKG060_002rim	Zana	0.110432	0.00784936	1.23516	0.08908	0.0811201	0.000984516	675.233	45.4063	816.645	39.6794	1224	23.8442	44.8339	17.3162	0.00346406
JKG060_002core	Zana	0.0672098	0.00141688	0.612621	0.0180995	0.0661086	0.00136778	419.31	8.55261	485.187	11.3323	809.5	43.2878	48.2014	13.5777	0.00258769
JKG060_003	Zana	0.0334329	0.000753042	0.59334	0.00606745	0.0558853	0.000283849	478.19	4.08887	472.974	3.85905	447.5	11.2871	#N/A	#DIV/0!	0
JKG060_04	Zana	0.0547327	0.0013155	0.569902	0.00401039	0.0568942	0.000284671	452.082	2.15973	457.928	2.5904	487	11.0441	7.16995	1.27658	0.000685546
JKG060_05	Zana	0.0658638	0.000996575	0.566677	0.00478272	0.0559373	0.000312077	457.036	2.79327	455.84	3.09486	449.5	12.3941	-1.6765	-0.262341	0.000769435
JKG060_06	Zana	0.0613227	0.000897497	0.642945	0.00817443	0.0593004	0.000677933	487.954	2.61299	504.103	5.03923	578	24.8427	15.579	3.2035	0.0011119
JKG060_07	Zana	0.0568651	0.00221418	0.58301	0.00590914	0.0561321	0.00030668	468.168	3.85352	466.37	3.78302	457.5	12.1191	-2.33174	-0.385371	0.000891334
JKG060_08	Zana	0.065236	0.000965479	0.569912	0.00717383	0.0585404	0.000328521	439.801	4.78794	457.935	4.62906	550	12.2522	20.0362	3.95991	0.000917707
JKG060_10	Zana	0.0595746	0.00106281	0.524379	0.0103535	0.0638386	0.000539756	373.026	12.9253	428.051	13.7455	736	35.8003	49.3172	12.8548	0.000657977
JKG060_11	Zana	0.0949474	0.00232209	2.54895	0.101747	0.194704	0.00613974	584.712	27.3124	1286.07	57.3994	2782	103.346	78.9823	54.535	0.0113747
JKG060_12	Zana	0.0589446	0.00115346	0.557396	0.014665	0.0685832	0.00120562	369.192	14.0354	449.807	19.032	886	72.67	58.3305	17.9221	0.00091112
JKG060_13A	Zana	0.0487104	0.00103953	0.487256	0.0173195	0.0725494	0.00206145	306.589	12.7732	403.018	23.5109	1001	115.402	69.3717	23.9267	0.00108762
JKG060_13B	Zana	0.0408135	0.00114949	0.509868	0.0190138	0.0906051	0.00221321	257.865	14.2307	418.339	25.4125	1438	93.1477	82.0678	38.3598	0.0028076
JKG060_14	Zana	0.0630758	0.00235725	0.748242	0.0729098	0.0860355	0.00773779	394.291	28.5558	567.175	82.9697	1338.5	347.724	70.5423	30.4816	0.00125404
JKG060_16a	Zana	0.0680569	0.000910348	0.549302	0.00868475	0.058538	0.000493236	424.425	10.984	444.517	11.3513	549.5	36.802	22.7616	4.51996	0.000294234
JKG060_16bcore	Zana	0.20839	0.00298567	2.43633	0.0396759	0.0847927	0.00065614	1220.2	31.8151	1253.33	23.3117	1310.5	30.0329	6.89083	2.64376	7.6582e-05
JKG060_18	Zana	0.038786	0.00214653	0.548879	0.0437965	0.102636	0.00589303	245.296	26.6131	444.239	56.6227	1672	212.304	85.3292	44.783	0.00281136
JKG060_19	Zana	0.0630857	0.000870984	0.551492	0.0107408	0.0634025	0.000870685	394.352	10.5584	445.951	14.0096	721.5	58.2836	45.3428	11.5706	0.000614673
JKG060_20oorim	Zana	0.0702456	0.00109695	0.537691	0.00937972	0.0555152	0.000431409	437.621	13.2074	436.879	12.3492	433	34.621	-1.06723	-0.16996	0.000146588
JKG060_20orim	Zana	0.061961	0.000979715	0.509259	0.00939697	0.05961	0.000566738	387.528	11.8884	417.929	12.6041	589	41.2495	34.2058	7.27441	0.000750126
JKG060_20crim	Zana	0.0694331	0.000953515	0.54356	0.00866104	0.0567779	0.000458628	432.725	11.4899	440.746	11.3624	482.5	35.686	10.316	1.81987	0.000329304
JKG060_21a	Zana	0.042383	0.00145881	0.535382	0.0304605	0.0916157	0.00414781	267.579	18.0303	435.353	39.892	1459	172.163	81.6601	38.5375	0.00227895
JKG060_21b	Zana	0.0655484	0.00225476	0.516195	0.0183507	0.057115	0.000511563	409.267	27.2523	422.585	24.4298	495.5	39.4827	17.4032	3.15153	0.00028139
JKG060_22	Zana	0.0663297	0.00130924	0.632182	0.0200703	0.0691247	0.00171822	413.992	15.8197	497.429	24.818	902	102.51	54.1029	16.7737	0.0010228
JKG060_23	Zana	0.0457487	0.000645976	0.368775	0.00725746	0.058463	0.000801204	288.359	7.96139	318.729	10.7385	547	59.8743	47.2836	9.52849	0.000625493
OUR018_01CORE	Zana	0.0967655	0.00203514	1.17721	0.0269287	0.0882333	0.000793171	595.406	23.9007	789.974	24.9621	1387.5	34.513	57.0878	24.6296	0.00150327
OUR018_01rim	Zana	0.0708932	0.00106574	0.560545	0.0095176	0.0573462	0.000452428	441.521	12.824	451.858	12.3472	504.5	34.7226	12.4835	2.28785	8.77216e-05
OUR018_02core	Zana	0.162476	0.00239231	1.68487	0.0282123	0.0752102	0.000599427	970.491	26.5046	1002.78	21.2266	1074	32.0104	9.63775	3.21954	0.000964646
OUR018_02rim	Zana	0.0683744	0.000952542	0.542836	0.00867174	0.0575802	0.000449963	426.341	11.4895	440.27	11.3817	513.5	34.3394	16.9735	3.16375	8.56509e-05
OUR018_03	Zana	0.13362	0.00203316	1.37168	0.023513	0.0744526	0.000587439	808.455	23.1019	876.837	20.033	1053.5	31.7892	23.2601	7.79867	0.000181096
OUR018_04	Zana	0.0757286	0.00100611	0.686863	0.010724	0.0657823	0.000539282	470.561	12.0524	530.887	12.8688	799	34.3639	41.1062	11.3632	0.000635894
OUR018_05core	Zana	0.171432	0.00274921	1.87226	0.0334403	0.0792087	0.000622528	1019.96	30.2215	1071.27	23.5054	1177	31.0929	13.3422	4.78985	0.000564892
OUR018_05rim	Zana	0.0649054	0.00094485	0.529601	0.00979613	0.0591788	0.000675108	405.376	11.4339	431.523	12.9636	573.5	49.6185	29.3155	6.05921	0.000247762
OUR018_06	Zana	0.104263	0.00157819	1.23199	0.0592334	0.0856986	0.00390992	639.324	18.4124	815.202	53.1879	1331	176.573	51.9666	21.5748	0.000658233
OUR018_07core	Zana	0.155758	0.00217635	1.55404	0.0247857	0.0723618	0.000556269	933.131	24.2542	952.052	19.6116	996	31.2412	6.31217	1.98739	0.00204478
OUR018_07rim	Zana	0.0724673	0.00096668	0.563488	0.0086746	0.0563951	0.000433183	450.989	11.6155	453.771	11.2355	467.5	34.0234	3.53179	0.613167	5.66855e-05
OUR018_08core	Zana	0.162919	0.0021924	1.67722	0.0262007	0.0746652	0.000592124	972.946	24.2827	999.879	19.7765	1059.5	31.9186	8.16929	2.69358	0.000412965
OUR018_08rim	Zana	0.0680746	0.000922401	0.55277	0.0089267	0.0588923	0.000517236	424.531	11.1292	446.787	11.6406	563	38.267	24.5948	4.98127	0.000270189
OUR018_09	Zana	0.157361	0.00883146	1.67917	0.100679	0.0773922	0.00162917	942.062	98.0045	1000.62	74.9103	1131	83.8423	16.7054	5.85182	0.000125947
OUR018_10icore	Zana	0.184477	0.00266087	2.01522	0.0335229	0.0792277	0.000656279	1091.35	28.9297	1120.59	22.4522	1177.5	32.768	7.31614	2.60932	0.00113506
OUR018_10ocore	Zana	0.180964	0.0025689	1.9524	0.0315702	0.0782483	0.000605597	1072.21	28.0139	1099.22	21.5987	1153	30.7235	7.00728	2.45736	0.00039072
OUR018_10rim	Zana	0.0720167	0.00174721	0.563974	0.0144227	0.0567969	0.000458764	448.279	20.9954	454.087	18.6406	483.5	35.6743	7.28449	1.27889	0.000199739
OUR018_11rim	Zana	0.239462	0.00330095	3.00461	0.0475222	0.0910018	0.000705409	1383.86	34.2896	1408.72	23.9557	1446.5	29.5223	4.33064	1.76485	0.000311345
OUR018_11core	Zana	0.217001	0.00359326	2.74867	0.0508073	0.0918668	0.000754243	1265.97	38.0094	1341.66	27.3376	1464.5	31.1927	13.5562	5.64157	0.000791246
OUR018_12irim	Zana	0.0674243	0.000964228	0.53111	0.00920382	0.0571303	0.000558951	420.605	11.6407	432.524	12.1702	496.5	43.1132	15.2859	2.75557	0.000616724
OUR018_12orim	Zana	0.0694084	0.00216241	0.646394	0.0228579	0.0675435	0.00112885	432.577	26.0429	506.232	27.999	854.5	69.4284	49.3766	14.5497	0.0010002
OUR018_12core	Zana	0.12412	0.00357849	1.4084	0.0425846	0.0822969	0.000748746	754.21	40.9761	892.44	35.5918	1252.5	35.5988	39.7836	15.489	0.0014462
OUR018_13core	Zana	0.181718	0.0025592	1.94908	0.0314459	0.0777911	0.000612055	1076.32	27.8904	1098.07	21.5383	1141.5	31.2842	5.71029	1.98127	0.000767324
OUR018_13rim	Zana	0.0752355	0.00104513	0.58363	0.00931553	0.0562618	0.000442084	467.606	12.5254	466.768	11.9102	462.5	34.831	-1.10404	-0.179537	0.00010715
OUR018_14	Zana	0.210572	0.00306371	2.45715	0.0403954	0.084631	0.000647481	1231.82	32.5868	1259.46	23.59	1307	29.7047	5.75187	2.19446	3.97166e-05
OUR018_15	Zana	0.169994	0.00259841	1.81738	0.0310879	0.0775374	0.000595124	1012.04	28.6007	1051.69	22.2843	1135	30.5475	10.8331	3.76952	0.000113921
OUR018_16	Zana	0.13942	0.00200822	1.39889	0.024849	0.0727708	0.000756195	841.352	22.7028	888.419	20.9265	1007.5	42.1556	16.4911	5.29785	0.000380394
OUR018_17	Zana	0.0791649	0.00113938	0.666425	0.0111502	0.0610544	0.000520708	491.12	13.6045	518.51	13.5421	641	36.6775	23.3822	5.28243	0.000301836
OUR018_19left	Zana	0.145266	0.00281976	1.70556	0.0365555	0.0851531	0.000773365	874.345	31.7034	1010.57	27.2531	1319	35.2017	33.7116	13.4798	0.000292275
OUR018_19right	Zana	0.134735	0.00591217	1.40239	0.0640908	0.0754895	0.000962023	814.794	66.9973	889.9	53.4639	1081.5	51.1246	24.6607	8.43982	0.000202791
OUR018_20rim	Zana	0.0702921	0.00107136	0.661552	0.0138481	0.0682583	0.000979071	437.901	12.8988	515.537	16.8542	876	59.3936	50.0113	15.0591	0.00106113
OUR018_20core	Zana	0.101613	0.00145203	0.970576	0.0162865	0.0692752	0.000609132	623.836	16.9822	688.726	16.7141	906.5	36.2367	31.1819	9.42174	0.00113353
OUR018_20core2	Zana	0.140767	0.00210184	1.37755	0.0242091	0.0709749	0.000657556	848.97	23.7321	879.348	20.5725	956.5	37.8811	11.2421	3.45463	0.0027963
OUR018_21core	Zana	0.122217	0.00192037	1.64688	0.0313247	0.0977304	0.00104713	743.285	22.043	988.303	23.891	1581	40.0846	52.9864	24.7918	0.000749603
OUR018_21rim	Zana	0.062149	0.00104012	0.50783	0.00972328	0.0592628	0.000550918	388.669	12.6189	416.968	13.0527	576.5	40.4145	32.5812	6.78671	0.000349401
OUR018_22rim	Zana	0.0697016	0.00107769	0.539588	0.0093132	0.0561459	0.000430482	434.343	12.9821	438.13	12.2468	458	34.0123	5.16519	0.864338	8.78611e-05
OUR018_22core	Zana	0.0881712	0.00362347	0.794314	0.0346224	0.0653377	0.000947472	544.695	42.8587	593.586	38.8097	785	60.9151	30.6121	8.23653	0.000340692
OUR018_23core	Zana	0.0708731	0.00100081	0.550391	0.00893853	0.0563233	0.000451598	441.399	12.0433	445.23	11.6738	465	35.5252	5.0754	0.860373	0.000588821
OUR018_23rim	Zana	0.0729578	0.00113335	0.568994	0.00986402	0.0565633	0.000435058	453.936	13.6108	457.34	12.7265	474.5	34.0216	4.33383	0.744378	4.86273e-05
OUR018_24	Zana	0.062679	0.00157858	0.514766	0.0143544	0.0595643	0.00071243	391.885	19.1371	421.627	19.1526	587.5	51.9026	33.2962	7.05427	0.000378656
OUR018_25bcore	Zana	0.125821	0.00414352	1.65486	0.0589107	0.0953912	0.00128789	763.955	47.3627	991.363	44.5672	1535.5	50.8147	50.2471	22.9389	0.00120341
OUR018_25brim	Zana	0.0908402	0.00294864	0.720959	0.0243642	0.0575614	0.000540336	560.486	34.8024	551.205	28.5472	513	41.2493	-9.25657	-1.68381	0.000669967
OUR018_25acore	Zana	0.115354	0.00775513	1.06588	0.076691	0.0670149	0.00171335	703.746	89.3316	736.678	74.0182	838	106.494	16.0208	4.4704	0.000124393
OUR018_25arim	Zana	0.0648444	0.000928458	0.527361	0.00866204	0.058984	0.000474526	405.007	11.2362	430.035	11.4839	566.5	35.03	28.5072	5.82005	0.000340804
OUR018_26rim	Zana	0.0684322	0.000962053	0.544409	0.00877639	0.0576983	0.000455021	426.69	11.6035	441.305	11.507	518	34.6277	17.6275	3.3118	0.000218907
OUR018_26icore	Zana	0.200051	0.00286621	2.35475	0.0385225	0.0853692	0.000673856	1175.56	30.7556	1228.93	23.1852	1323.5	30.5818	11.178	4.34317	-0.00106756
OUR018_26ocore	Zana	0.216262	0.00337142	2.57528	0.0452881	0.0863658	0.000702496	1262.06	35.6877	1293.58	25.5609	1346	31.4138	6.23662	2.43674	0.000385474
OUR018_27core	Zana	0.217391	0.00325682	2.70813	0.0459126	0.0903496	0.000716698	1268.04	34.4443	1330.62	24.9885	1432.5	30.2735	11.481	4.70348	0.000332783
OUR018_28core	Zana	0.160634	0.00263562	2.39222	0.0532721	0.108009	0.00162567	960.27	29.2434	1240.21	31.6422	1766	54.9921	45.6246	22.5721	0.00224346
OUR018_28rim	Zana	0.0653656	0.000920307	0.509825	0.00840477	0.0565679	0.000484931	408.161	11.1322	418.31	11.2728	474.5	37.9217	13.9808	2.42624	0.000155345
OUR018_29core	Zana	0.189638	0.00375493	2.08055	0.0452842	0.0795703	0.000718625	1119.38	40.6291	1142.36	29.6336	1186	35.6827	5.61742	2.01157	0.000743998
OUR018_29rim	Zana	0.076411	0.0011406	0.63085	0.0113726	0.0598782	0.000605012	474.649	13.6539	496.6	14.1116	599	43.759	20.7597	4.42019	0.000332816
OUR018_30rim	Zana	0.0731247	0.000986143	0.576975	0.00897232	0.0572257	0.000442931	454.939	11.842	462.492	11.5209	500	34.0896	9.01216	1.63315	0.000243473
OUR018_31core	Zana	0.174053	0.00277716	1.83086	0.0357441	0.0762908	0.000857932	1034.37	30.4604	1056.53	25.4799	1102.5	44.9765	6.17973	2.09788	0.00448177
OUR018_31rim	Zana	0.0698807	0.000942051	0.557782	0.00882464	0.0578903	0.000479189	435.423	11.347	450.059	11.471	525.5	36.296	17.1412	3.25207	0.000145014
OUR018_32core	Zana	0.178328	0.00240867	1.88022	0.0298405	0.0764698	0.00063699	1057.8	26.3271	1074.09	20.9304	1107	33.2964	4.4447	1.51663	0.000452751
BUT010_001	Kowaliga	0.0701681	0.000859318	0.0122466	0.600464	0.0620649	0.00178067	437.154	10.3481	477.504	23.6322	676	122.683	35.3322	8.45014	0.0017928
BUT010_2	Kowaliga	0.0684733	0.000712171	0.0104007	0.560735	0.0593929	0.00057714	426.937	8.59033	451.981	10.3591	581.5	42.2053	26.58	5.54097	0.00238075
BUT010_3RIM	Kowaliga	0.0721013	0.000867656	0.0120339	0.552732	0.0555994	0.000358683	448.788	10.4297	446.762	9.84687	436	28.7309	-2.93314	-0.453616	0.000293391
BUT010_3CORE	Kowaliga	0.0700069	0.000872934	0.0124692	0.53407	0.0553294	0.000619706	436.183	10.5136	434.485	11.8162	425.5	49.9648	-2.51074	-0.39081	0.00473214
BUT010_4	Kowaliga	0.0704397	0.000723464	0.0102707	0.545786	0.0561958	0.000380902	438.79	8.71048	442.21	8.80462	460	30.0575	4.61088	0.773438	0.000425902
BUT010_5	Kowaliga	0.07163	0.00111929	0.015626	0.545141	0.0551966	0.000412476	445.954	13.4587	441.786	12.3728	420	33.3705	-6.17952	-0.943393	0.000744037
BUT010_6	Kowaliga	0.0663458	0.000910356	0.0137214	0.5343	0.0584077	0.000441869	414.089	11.0018	434.637	11.0511	545	33.0625	24.0203	4.72758	0.000655042
BUT010_8	Kowaliga	0.0673867	0.00124586	0.0184882	0.569504	0.0612945	0.000477084	420.378	15.0393	457.67	14.7288	649.5	33.4249	35.2766	8.14823	0.0009522
BUT010_9A	Kowaliga	0.0666071	0.00103036	0.0154692	0.547136	0.0595763	0.00050838	415.669	12.4482	443.096	12.6489	588	37.0253	29.3081	6.19003	0.00114691
BUT010_09B	Kowaliga	0.0688829	0.000856582	0.0124353	0.527932	0.055586	0.000345658	429.408	10.3276	430.415	9.73261	435.5	27.6961	1.39884	0.233889	0.000644837
BUT010_10A	Kowaliga	0.0698276	0.00117724	0.0168592	0.54607	0.0567178	0.000400704	435.103	14.179	442.396	13.0698	480.5	31.2179	9.44786	1.64862	0.000940071
BUT010_10B	Kowaliga	0.0603265	0.00100183	0.0166068	0.531531	0.0639027	0.000612251	377.599	12.1754	432.803	13.4688	738	40.5571	48.8349	12.7551	0.00111215
BUT010_11	Kowaliga	0.0689727	0.000920829	0.0133506	0.535854	0.0563466	0.00036714	429.95	11.1009	435.665	10.4989	466	28.8632	7.7361	1.31182	0.000398464
BUT010_12	Kowaliga	0.0868483	0.00417771	0.0481035	0.762842	0.0637047	0.00144471	536.853	49.4619	575.619	46.2164	731.5	96.0973	26.6092	6.73458	0.000327133
BUT010_13	Kowaliga	0.0697296	0.000782656	0.0112242	0.538948	0.0560568	0.000385609	434.512	9.42914	437.708	9.34112	454.5	30.5335	4.39769	0.730137	0.000438254
BUT010_15A	Kowaliga	0.0690472	0.000744025	0.0107756	0.537634	0.0564728	0.000439887	430.399	8.96961	436.841	9.41954	471	34.4745	8.62022	1.47482	0.000379783
BUT010_15BRIM	Kowaliga	0.0704987	0.000762139	0.0108107	0.557094	0.0573121	0.000443814	439.145	9.17546	449.61	9.63935	503.5	34.0829	12.7815	2.32763	0.000344451
BUT010_15BCORE	Kowaliga	0.0589994	0.000691218	0.0117157	0.665167	0.0817677	0.00203368	369.526	8.41225	517.744	22.183	1239.5	97.516	70.1875	28.6277	0.00208918
BUT010_14	Kowaliga	0.0714728	0.000884447	0.0123746	0.5598	0.0568056	0.000427174	445.008	10.6377	451.373	10.5268	483.5	33.2179	7.96109	1.41021	0.000470577
BUT010_16	Kowaliga	0.0618485	0.000696509	0.0112615	0.479093	0.0561809	0.000386266	386.845	8.45388	397.43	8.66091	459.5	30.4902	15.8118	2.66341	0.000181525
BUT010_18	Kowaliga	0.0534221	0.00127862	0.0239343	0.498007	0.0676104	0.00134016	335.486	15.639	410.332	20.8764	856.5	82.319	60.8306	18.2402	0.00130974
BUT010_19	Kowaliga	0.0648549	0.000971984	0.0149871	1.45442	0.162646	0.0174367	405.07	11.7626	911.655	126.276	2483	361.55	83.6863	55.5676	0.00510071
BUT010_20	Kowaliga	0.07197	0.000926851	0.0128783	0.556107	0.056041	0.000356119	447.999	11.1423	448.967	10.3958	453.5	28.216	1.21306	0.215586	0.00032238
BUT010_21	Kowaliga	0.0708841	0.000786976	0.0111023	0.550855	0.0563621	0.000367227	441.466	9.47096	445.534	9.26459	466.5	28.861	5.3664	0.913176	0.000243369
BUT010_22	Kowaliga	0.0699213	0.00079027	0.0113023	0.537898	0.0557942	0.000359781	435.667	9.51913	437.016	9.22183	444	28.6755	1.87671	0.308521	0.000423452
BUT010_23	Kowaliga	0.0710359	0.00142388	0.0200446	0.549066	0.056059	0.000344832	442.379	17.1284	444.362	15.037	454.5	27.3047	2.66682	0.446162	0.000361376
BUT010_24	Kowaliga	0.0695759	0.000916996	0.0131798	0.544943	0.0568056	0.000401156	433.586	11.0485	441.656	10.6828	483.5	31.1946	10.3235	1.82725	0.00123512
BUT010_25	Kowaliga	0.0712549	0.00101476	0.0142413	0.560051	0.0570047	0.000385246	443.698	12.2068	451.537	11.4602	491.5	29.808	9.72582	1.73608	0.000403182
BUT010_25B	Kowaliga	0.0642224	0.000958555	0.0149255	0.595197	0.067216	0.00145048	401.24	11.6071	474.157	19.7869	844	89.8105	52.4597	15.3782	0.00117232
BUT010_26	Kowaliga	0.0709017	0.00135901	0.0191675	0.559963	0.0572798	0.000376847	441.572	16.3505	451.48	14.7196	502	28.9673	12.0375	2.19458	0.000207166
BUT010_27	Kowaliga	0.0675575	0.000831212	0.0123038	0.523051	0.0561525	0.0003978	421.41	10.0343	427.166	9.87785	458	31.4301	7.98905	1.34746	0.000541146
BUT010_27	Kowaliga	0.0684895	0.000824219	0.0120342	0.52942	0.0560628	0.000385641	427.035	9.94121	431.403	9.72115	454.5	30.5361	6.04286	1.01238	0.000892658
BUT010_28CORE	Kowaliga	0.0684895	0.000824219	0.0120342	0.52942	0.0560628	0.000385641	427.035	9.94121	431.403	9.72115	454.5	30.5361	6.04286	1.01238	0.000892658
BUT010_28RIM	Kowaliga	0.0690666	0.000873275	0.012644	0.537974	0.0564926	0.000478829	430.516	10.527	437.065	10.7849	471.5	37.5148	8.69224	1.49849	0.000778659
BUT010_32	Kowaliga	0.0645246	0.00064881	0.0100552	0.523508	0.0588433	0.000473334	403.07	7.85532	427.47	8.96616	561	35.0629	28.1514	5.70802	0.000314666
BUT010_35CORE	Kowaliga	0.0633899	0.000991034	0.0156339	0.893195	0.102194	0.0100002	396.196	12.0096	648.051	92.8073	1664	362.202	76.1902	38.8635	0.00102906
BUT010_35WRIM	Kowaliga	0.0665931	0.000870346	0.0130696	0.563981	0.0614234	0.000758136	415.584	10.516	454.091	13.123	654	52.9649	36.455	8.48009	0.000781781
BUT010_35BRIM	Kowaliga	0.0653426	0.000738701	0.011305	0.54719	0.0607352	0.000715853	408.022	8.9364	443.132	11.6967	629.5	50.7903	35.1832	7.9231	0.000771778
BUT011_1ACORE	Kowaliga	0.0678352	0.000946891	0.52189	0.00799071	0.0557985	0.00035089	423.087	11.4271	426.392	10.6341	444	27.9669	4.71024	0.77515	0.000340539
BUT011_1ARIM	Kowaliga	0.0669478	0.00140442	0.514115	0.0113087	0.0556958	0.000368116	417.728	16.9591	421.191	15.1104	440	29.4131	5.06193	0.822362	0.000877616
BUT011_1B	Kowaliga	0.0659204	0.000732042	0.50892	0.00741595	0.0559922	0.000528164	411.517	8.85108	417.701	9.95574	452	41.8866	8.95633	1.48047	0.00229915
BUT011_1C	Kowaliga	0.0652794	0.000974753	0.63667	0.0532396	0.0707354	0.00581868	407.639	11.7914	500.217	65.0042	949.5	336.721	57.068	18.5075	0.00573987
BUT011_2CORE	Kowaliga	0.0651533	0.000827622	0.498859	0.0072106	0.0555316	0.000382837	406.876	10.0135	410.909	9.74553	433.5	30.7135	6.14161	0.981396	0.00218051
BUT011_2RIM	Kowaliga	0.0623733	0.00231373	0.985304	0.212965	0.11457	0.0243825	390.03	28.0477	696.286	206.921	1873	767.473	79.1762	43.9842	0.00233698
BUT011_3CORE	Kowaliga	0.0676011	0.000770322	0.522982	0.00789733	0.0561089	0.000555816	421.674	9.29909	427.12	10.5027	456.5	43.9561	7.62902	1.27517	0.00522436
BUT011_3RIM	Kowaliga	0.0672708	0.000755399	0.520726	0.00691446	0.0561411	0.000397741	419.679	9.12184	425.615	9.21212	457.5	31.4353	8.26694	1.3947	0.00247007
BUT011_4TRIM	Kowaliga	0.0670499	0.000784913	0.520613	0.0075291	0.0563138	0.000478063	418.344	9.48006	425.539	10.0297	464.5	37.6188	9.93664	1.69073	0.00234007
BUT011_4CORE	Kowaliga	0.0656238	0.000779885	0.506739	0.00720844	0.0560043	0.000437704	409.723	9.43196	416.233	9.69179	452.5	34.7018	9.4534	1.56392	0.00137524
BUT011_4BRIM	Kowaliga	0.0650731	0.00074878	0.498393	0.00701832	0.0555481	0.000450783	406.391	9.06058	410.593	9.48921	434	36.1532	6.36153	1.02343	0.00246278
BUT011_5ARIM	Kowaliga	0.0637547	0.000900927	0.494623	0.00773285	0.0562679	0.000376131	398.406	10.9144	408.035	10.4791	462.5	29.6347	13.8581	2.35976	0.000525837
BUT011_5ACORE	Kowaliga	0.0513868	0.00180733	0.42448	0.0176473	0.0599107	0.00132678	323.02	22.143	359.231	25.0025	600	95.9022	46.1634	10.0803	0.0067097
BUT011_5B	Kowaliga	0.0635517	0.000799795	0.504647	0.00727675	0.0575915	0.000405208	397.177	9.6915	414.822	9.79699	514	30.9143	22.7283	4.25375	0.000671497
BUT011_7RIM	Kowaliga	0.0649644	0.000767611	0.5193	0.00789053	0.057975	0.000553685	405.733	9.28932	424.662	10.519	528.5	41.8599	23.2293	4.45732	0.00366745
BUT011_7RRIM	Kowaliga	0.0656272	0.000741158	0.503375	0.00704108	0.0556297	0.000458993	409.744	8.96373	413.963	9.48844	437.5	36.7314	6.34432	1.01936	0.00219528
BUT011_8A	Kowaliga	0.0709497	0.000756534	0.557138	0.00695976	0.0569523	0.000370522	441.86	9.10417	449.639	9.056	489.5	28.7046	9.73232	1.73003	0.000373863
BUT011_8BCORE	Kowaliga	0.0666449	0.000788288	0.522694	0.00773386	0.0568825	0.000505504	415.897	9.52442	426.928	10.2878	486.5	39.2353	14.5124	2.58369	0.00164893
BUT011_8BRIM	Kowaliga	0.0410084	0.000566809	0.385482	0.0125819	0.0681757	0.00201539	259.072	7.01776	331.047	18.3576	873.5	122.456	70.3409	21.7415	0.0403418
BUT011_8C	Kowaliga	0.0624801	0.000823453	0.489564	0.0074907	0.0568284	0.000441548	390.678	9.98813	404.593	10.1862	484.5	34.3141	19.3647	3.43909	0.00286225
BUT011_9	Kowaliga	0.0566052	0.000685429	0.437345	0.00595418	0.056036	0.000348572	354.935	8.36071	368.36	8.39462	453.5	27.6181	21.7342	3.64452	0.000278448
BUT011_10ARIM	Kowaliga	0.0675512	0.000809549	0.523595	0.00723456	0.0562161	0.000386452	421.372	9.77291	427.528	9.61947	460.5	30.4859	8.49685	1.43997	0.00189864
BUT011_12	Kowaliga	0.0617543	0.000684123	0.516072	0.00699829	0.0606096	0.000473893	386.273	8.30433	422.502	9.35211	625	33.7186	38.1963	8.57493	0.00312783
JKG030_02	Kowaliga	0.077185	0.00209123	0.641194	0.0190094	0.0602498	0.000724467	479.283	25.0048	503.02	23.3853	612.5	51.9553	21.7497	4.71892	0.00024418
JKG030_01CORE	Kowaliga	0.0793278	0.00120386	1.10201	0.0278151	0.100753	0.00203148	492.094	14.372	754.283	26.6948	1638	74.8676	69.9577	34.7601	0.00444415
JKG030_01rim	Kowaliga	0.0749132	0.00268161	1.20443	0.303318	0.116606	0.0290522	465.673	32.123	802.588	261.785	1904.5	895.206	75.5488	41.9785	0.00118618
JKG030_03	Kowaliga	0.0735497	0.0018383	0.793338	0.0365379	0.0782304	0.00302495	457.491	22.0576	593.033	40.9574	1152.5	153.514	60.3044	22.8557	0.00133448
JKG030_04	Kowaliga	0.0861167	0.00448998	0.755403	0.0403823	0.0636194	0.000748457	532.513	53.1871	571.325	46.1854	729	49.8638	26.953	6.79343	0.000231879
JKG030_05	Kowaliga	0.0746797	0.00121012	0.596751	0.00996873	0.0579547	0.000235067	464.273	14.5091	475.146	12.6383	528	17.7772	12.0695	2.28822	0.000247661
JKG030_06	Kowaliga	0.0717408	0.00119811	0.669653	0.0183101	0.0676989	0.00146522	446.621	14.4045	520.475	22.1478	859	89.8571	48.0069	14.1897	0.000980411
JKG030_08	Kowaliga	0.0751863	0.00101871	0.582868	0.00830671	0.056225	0.000248292	467.311	12.2094	466.279	10.6288	461	19.5808	-1.36904	-0.221391	0.000628089
JKG030_09core	Kowaliga	0.0784905	0.00153011	0.644754	0.0136812	0.0595765	0.000498926	487.091	18.2782	505.219	16.8214	588	36.3368	17.1614	3.58826	0.000254625
JKG030_09rim	Kowaliga	0.0697288	0.00111191	0.549151	0.0092325	0.0571187	0.000304023	434.507	13.3938	444.418	12.0663	496	23.4573	12.3977	2.22994	0.000201598
JKG030_030	Kowaliga	0.0719581	0.00102955	0.58084	0.00870536	0.0585431	0.000261094	447.927	12.3764	464.977	11.1518	550	19.475	18.5587	3.66689	0.000368068
JKG030_010	Kowaliga	0.0694151	0.00105523	0.587894	0.0100039	0.0614248	0.000469468	432.617	12.7151	469.498	12.7533	654	32.798	33.8507	7.85548	0.000536006
JKG030_031	Kowaliga	0.0778038	0.00221218	0.646579	0.0200546	0.0602725	0.000746213	482.985	26.4344	506.345	24.5831	613	53.498	21.2097	4.61357	0.000173353
JKG030_011	Kowaliga	0.0671678	0.000934534	0.557663	0.00805129	0.0602156	0.000231942	419.057	11.2851	449.981	10.4691	611	16.6495	31.4146	6.87248	0.000536544
JKG030_012	Kowaliga	0.0739055	0.00105154	0.688736	0.0377871	0.0675888	0.00358058	459.627	12.6177	532.014	44.9371	855.5	220.077	46.2738	13.6061	0.000443215
JKG030_013	Kowaliga	0.0739055	0.00105154	0.68934	0.0377894	0.0676481	0.00358059	459.627	12.6177	532.377	44.9239	857.5	219.797	46.3991	13.665	0.000443215
JKG030_013	Kowaliga	0.0860152	0.0026143	0.748456	0.0242835	0.0631087	0.000715612	531.91	30.9978	567.299	28.0089	711.5	48.2077	25.241	6.23814	0.000303925
JKG030_014	Kowaliga	0.0753856	0.00106834	0.588198	0.00863539	0.0565892	0.000216796	468.506	12.8015	469.692	11.0113	475.5	16.9429	1.4709	0.252562	0.000409579
JKG030_015	Kowaliga	0.0785595	0.00332046	0.759945	0.0326541	0.0701588	0.000540939	487.503	39.6297	573.949	37.3318	933	31.6373	47.7488	15.0616	0.000861824
JKG030_016	Kowaliga	0.149254	0.00213748	1.58496	0.0249045	0.077018	0.000497719	896.751	23.9561	964.272	19.4705	1121.5	25.7728	20.0401	7.0023	0.000542785
JKG030_017	Kowaliga	0.0731626	0.000965452	0.604443	0.00833313	0.059919	0.000239018	455.167	11.5932	480.025	10.5195	600.5	17.2712	24.202	5.17848	0.000431473
JKG030-18core	Kowaliga	0.0689271	0.00158334	0.705061	0.0207095	0.0741883	0.00135728	429.674	19.0827	541.782	24.5156	1046.5	73.7824	58.9418	20.6923	0.00153422
JKG030-18rim	Kowaliga	0.072821	0.00101082	0.587126	0.00934873	0.0584754	0.00045599	453.114	12.1416	469.007	11.9262	547.5	34.0656	17.2394	3.38852	0.000202262
JKG030-18rim	Kowaliga	0.0720778	0.00112035	0.558814	0.00891474	0.0562296	0.000201693	448.647	13.4659	450.732	11.5801	461	15.9059	2.67964	0.462499	0.000138238
JKG030-32	Kowaliga	0.0720778	0.00112035	0.558422	0.0089086	0.0561901	0.000201604	448.647	13.4659	450.476	11.5751	459.5	15.9138	2.36194	0.406012	0.000138238
JKG030-19	Kowaliga	0.16649	0.00507933	1.76648	0.0544499	0.0769518	0.000337547	992.711	56.0164	1033.18	39.5793	1119.5	17.5015	11.3255	3.91656	6.96035e-05
JKG030-07	Kowaliga	0.106864	0.00153225	1.19655	0.0251808	0.0812082	0.00125056	654.488	17.8349	798.954	23.1466	1226	60.4963	46.616	18.0819	0.00131828
JKG030-33	Kowaliga	0.0934762	0.00128814	0.931326	0.0136701	0.0722602	0.000365025	576.045	15.1786	668.298	14.3226	993	20.5402	41.9895	13.8042	0.000448187
JKG030-20	Kowaliga	0.0713833	0.001266	0.557518	0.0101012	0.0566448	0.000209596	444.47	15.2254	449.887	13.1272	477.5	16.3597	6.91724	1.20395	0.000421459
JKG030-21	Kowaliga	0.0811073	0.00188883	0.668606	0.017282	0.0597873	0.000669981	502.712	22.505	519.838	20.9237	595.5	48.565	15.5815	3.29446	0.000154274
JKG030-22	Kowaliga	0.0667179	0.00104197	0.611814	0.0111875	0.0665082	0.000632307	416.338	12.5871	484.679	14.046	822	39.7049	49.3505	14.1002	0.000885795
JKG030-23	Kowaliga	0.0694136	0.000994811	0.591249	0.00978737	0.0617766	0.000511565	432.608	11.9875	471.641	12.4518	666	35.469	35.0438	8.27596	0.000542965
JKG030_24	Kowaliga	0.0720589	0.00112016	0.562399	0.00918889	0.0566051	0.000284555	448.533	13.4638	453.063	11.9079	476	22.2314	5.77029	0.999872	0.000187311
JKG030_25	Kowaliga	0.0720854	0.00100775	0.57595	0.00956083	0.0579477	0.000518509	448.693	12.113	461.832	12.2822	527.5	39.2251	14.9397	2.84504	0.000212316
JKG030_26	Kowaliga	0.0782411	0.00245342	0.759452	0.0243957	0.0703986	0.000489725	485.6	29.302	573.665	27.9628	940	28.5135	48.3404	15.3513	0.000955402
JKG030_28	Kowaliga	0.106166	0.00570406	1.08084	0.0625161	0.0738371	0.00157828	650.423	66.3102	744.008	60.11	1037	86.3243	37.2784	12.5784	0.000627199
JKG030_27	Kowaliga	0.071571	0.00101914	0.567645	0.00896691	0.0575226	0.000393192	445.599	12.2558	456.467	11.5823	511.5	30.0445	12.8838	2.38096	0.000300151
JKG030_29	Kowaliga	0.107786	0.00332933	1.04077	0.0326192	0.0700311	0.000370869	659.853	38.6886	724.262	32.201	929	21.7464	28.9716	8.89296	0.00047259
OUR029-001RIM	Kowaliga	0.0709361	0.000258858	0.547275	0.00476463	0.0559547	0.000442263	441.779	3.11587	443.187	6.24355	450.5	35.107	1.93585	0.317812	0.000218621
OUR029-001CORE	Kowaliga	0.0533067	0.000560906	0.461542	0.00733105	0.0627954	0.00074703	334.78	6.86363	385.31	10.1603	701	50.6602	52.2425	13.1141	0.00417094
OUR029-002CORE	Kowaliga	0.0704396	0.000802238	0.627782	0.0145805	0.0646384	0.00130812	438.79	9.65856	494.688	18.1083	762.5	85.3147	42.4538	11.2998	0.000707104
OUR029-2RIM	Kowaliga	0.0678371	0.000385693	0.542857	0.00561257	0.0580386	0.00050113	423.098	4.65578	440.284	7.3737	531	37.8273	20.3205	3.90342	0.000752162
OUR029-3CORE	Kowaliga	0.0672121	0.000347288	0.558394	0.0113326	0.0602548	0.00118249	419.324	4.19472	450.458	14.7135	612.5	84.8023	31.5389	6.91152	0.0034587
OUR029-3RIM	Kowaliga	0.0711859	0.000639284	0.545148	0.00633773	0.0555416	0.000409977	443.282	7.6919	441.791	8.31214	434	32.8805	-2.1388	-0.337623	0.000192159
OUR029-4CORE	Kowaliga	0.0697776	0.000478098	0.532669	0.00539052	0.0553656	0.000412276	434.802	5.76051	433.558	7.12947	427	33.2094	-1.82712	-0.286958	9.50778e-05
OUR029-4RIM	Kowaliga	0.0693125	0.000399895	0.541052	0.00504039	0.0566142	0.000414052	431.999	4.82052	439.095	6.63095	476.5	32.3386	9.33924	1.61627	0.000225851
OUR029-5CORE	Kowaliga	0.0693962	0.000464665	0.530264	0.00536567	0.0554185	0.000420387	432.503	5.60068	431.963	7.1078	429	33.8205	-0.816599	-0.125143	-0.000344678
OUR029-6CORE	Kowaliga	0.0717313	0.000572436	0.656509	0.0128697	0.066379	0.00118839	446.564	6.88429	512.451	15.7156	818	74.8138	45.4079	12.8572	0.00136404
OUR029-6RIM	Kowaliga	0.0686153	0.000386473	0.529437	0.00517862	0.0559618	0.000447476	427.794	4.6618	431.414	6.86413	450.5	35.5208	5.04016	0.839107	0.000338182
OUR029-7CORE	Kowaliga	0.0651605	0.000272624	0.592718	0.00726905	0.0659724	0.000760493	406.92	3.29934	472.578	9.24672	805	48.2747	49.4509	13.8936	0.00143512
OUR029-7INNERRIM	Kowaliga	0.0697704	0.000425995	0.551957	0.00549568	0.0573764	0.000451209	434.758	5.13289	446.255	7.17814	506	34.5966	14.0794	2.57639	0.000398605
OUR029-7OUTERRIM	Kowaliga	0.074464	0.000392566	0.58395	0.005382	0.0568758	0.000429935	462.979	4.70951	466.973	6.88816	486.5	33.3699	4.8347	0.855217	0.000188192
OUR029-8CORE	Kowaliga	0.069636	0.000301812	0.5319	0.00448171	0.0553981	0.000400258	433.949	3.63726	433.048	5.93221	428	32.2213	-1.38986	-0.207992	9.77842e-05
OUR029-8RIM	Kowaliga	0.0602783	0.00112987	0.457633	0.00917276	0.0550624	0.000390647	377.305	13.7313	382.591	12.7388	414.5	31.7129	8.97335	1.38149	9.6638e-05
OUR029-10CORE	Kowaliga	0.0697022	0.000544265	0.56982	0.00789723	0.0592911	0.000678796	434.347	6.558	457.875	10.19	577.5	49.7642	24.7883	5.1384	0.000417247
OUR029-10RIM	Kowaliga	0.0657278	0.000409355	0.533296	0.00585945	0.0588461	0.000532592	410.352	4.95113	433.972	7.74534	561	39.4526	26.8534	5.44276	0.000312088
OUR029-11CORE	Kowaliga	0.0562883	0.000726925	0.419626	0.00629112	0.0540684	0.000411572	353.002	8.86935	355.766	8.97907	373.5	34.2737	5.48818	0.776959	0.000164628
OUR029-12CORE	Kowaliga	0.0689569	0.000374182	0.529998	0.00504548	0.0557435	0.000435978	429.855	4.51212	431.786	6.6855	442	34.7919	2.74781	0.447353	0.00276822
OUR029-12INNERRIM	Kowaliga	0.0701245	0.000326179	0.547184	0.00485922	0.0565929	0.000428079	436.892	3.92907	443.128	6.36768	475.5	33.455	8.11954	1.40733	0.000199395
OUR029-12OUTERRIM	Kowaliga	0.0694471	0.000624679	0.535598	0.00632557	0.055935	0.000427998	432.81	7.52844	435.496	8.3477	449.5	33.9959	3.71307	0.616787	0.0002978
OUR029-13OUTERRIM	Kowaliga	0.0651903	0.00104822	0.52962	0.010048	0.0589223	0.000593054	407.1	12.6808	431.535	13.2957	564	43.8487	27.8191	5.66237	0.000463006
OUR029-13CORE	Kowaliga	0.0698462	0.000302088	0.538433	0.00466435	0.0559098	0.000419622	435.215	3.63986	437.369	6.14741	448.5	33.3513	2.96216	0.492476	0.000684317
OUR029-13INNERCORE	Kowaliga	0.0686106	0.000437891	0.539275	0.00631706	0.0570056	0.000559884	427.766	5.28191	437.924	8.31663	491.5	43.3204	12.9673	2.3196	0.000806159
OUR029-14OUTERRIM	Kowaliga	0.0646492	0.00056763	0.524093	0.00711424	0.0587954	0.000608573	403.825	6.87191	427.86	9.45677	559.5	45.1235	27.8239	5.61754	0.000423408
OUR029-14CORE	Kowaliga	0.0685837	0.000450895	0.556708	0.00588691	0.0588715	0.000487536	427.604	5.43888	449.359	7.66475	562	36.0923	23.9139	4.84135	0.000354869
OUR029-14OUTERRIM2	Kowaliga	0.0688571	0.000678536	0.553493	0.00691547	0.0582991	0.000447698	429.252	8.18181	447.259	9.01957	541	33.5828	20.6558	4.02609	0.000491797
OUR029-15CORE	Kowaliga	0.0586476	0.000577504	0.472667	0.00653536	0.0584525	0.000567237	367.384	7.03103	393.009	8.99169	546.5	42.4032	32.7751	6.52032	0.00146757
OUR029-15CORE	Kowaliga	0.0586728	0.000577518	0.47287	0.00653683	0.0584525	0.000567237	367.537	7.03104	393.149	8.99247	546.5	42.4032	32.747	6.51457	0.00146757
OUR029-15INNERRIM	Kowaliga	0.0711437	0.000466161	0.554948	0.00565346	0.0565737	0.000441251	443.028	5.60955	448.21	7.36966	474.5	34.5059	6.63261	1.15612	-0.00145412
OUR029-15OUTERRIM	Kowaliga	0.0715839	0.000453532	0.553622	0.00543681	0.0560914	0.000420823	445.677	5.45537	447.344	7.09378	455.5	33.301	2.15653	0.372589	0.000351617
OUR029-16CORE	Kowaliga	0.0670992	0.000372261	0.540518	0.00948122	0.0584241	0.000972124	418.642	4.49678	438.744	12.4596	545.5	72.7156	23.2554	4.58177	0.0019924
OUR029-16CORE	Kowaliga	0.0735684	0.000831196	0.584435	0.00813625	0.057616	0.000468507	457.604	9.97791	467.284	10.401	515	35.7211	11.1449	2.07159	0.000789372
OUR029-16OUTERRIM	Kowaliga	0.0698175	0.000692683	0.531599	0.00675105	0.0552228	0.000437676	435.042	8.34485	432.849	8.93118	421	35.3873	-3.33547	-0.506821	8.8465e-05
OUR029-17CORE	Kowaliga	0.0749516	0.000521797	1.0839	0.0275286	0.104883	0.00256151	465.904	6.25664	745.496	26.6498	1712	89.8445	72.786	37.5042	0.00457465
OUR029-17CORE2	Kowaliga	0.0687118	0.000597225	0.533062	0.00656604	0.0562659	0.000490998	428.376	7.20261	433.817	8.67868	462.5	38.6849	7.37817	1.25433	-0.00633132
OUR029-17CORE2	Kowaliga	0.0646832	0.000460792	0.520687	0.00662078	0.0583826	0.00061484	404.031	5.57859	425.589	8.82193	544	46.0338	25.7296	5.06537	0.000348634
OUR029-18CORE	Kowaliga	0.0612053	0.00140846	0.497249	0.0121458	0.0589229	0.000482078	382.939	17.0998	409.818	16.4064	564	35.6434	32.103	6.55876	0.000439263
OUR029-18OUTERRIM	Kowaliga	0.0699458	0.000268155	0.551868	0.00492058	0.0572232	0.000460614	435.815	3.23076	446.197	6.42853	500	35.4505	12.8369	2.32671	0.000625814
OUR029-18OUTERRIM2	Kowaliga	0.064315	0.000369463	0.50493	0.00516675	0.05694	0.000482116	401.801	4.47466	415.013	6.95977	489	37.3616	17.8321	3.18353	0.000299251
OUR029-19CORE	Kowaliga	0.0664713	0.000358997	0.54306	0.0056584	0.0592533	0.000527928	414.848	4.33913	440.418	7.43282	576	38.7402	27.9778	5.80592	0.000778531
OUR029-19OUTERRIM	Kowaliga	0.0564382	0.000273466	0.429612	0.00395812	0.055208	0.000432584	353.916	3.33686	362.883	5.61446	420.5	34.9865	15.8344	2.47082	0.000181243
OUR029-20CORE	Kowaliga	0.0692541	0.000705976	1.01928	0.0755917	0.106744	0.00784007	431.647	8.50942	713.513	74.6297	1744.5	269.064	75.2567	39.5041	0.0012511
OUR029-20OUTERRIM	Kowaliga	0.0425427	0.00308363	0.503578	0.0381479	0.0858499	0.00188346	268.566	38.0769	414.1	50.8781	1334.5	84.8624	79.8752	35.1447	0.00363187
OUR029-21CORE	Kowaliga	0.0978913	0.00378959	0.97308	0.0423436	0.0720946	0.00143095	602.02	44.4241	690.015	43.1184	988.5	80.7545	39.0976	12.7526	0.000649422
OUR029-21INNERRIM	Kowaliga	0.0666058	0.00059587	0.61841	0.0110372	0.0673384	0.0010398	415.661	7.20046	488.825	13.8017	848	64.2175	50.9834	14.9674	0.000844053
OUR029-21OUTERRIM	Kowaliga	0.0901531	0.00462794	1.42584	0.125344	0.114707	0.0081784	556.425	54.6152	899.765	102.304	1875	257.079	70.324	38.1589	0.00411904
OUR029-22CORE	Kowaliga	0.243923	0.00126233	3.106	0.0291085	0.0923525	0.000721506	1407.01	13.0766	1434.11	14.3451	1474.5	29.642	4.57702	1.88923	0.000735272
OUR029-22OUTERRIM	Kowaliga	0.0710427	0.000388953	0.557536	0.00578247	0.0569183	0.000501328	442.42	4.68108	449.898	7.52503	488	38.8746	9.34011	1.66215	0.000188151
OUR029-23CORE	Kowaliga	0.0694166	0.000530729	0.555739	0.00615921	0.0580639	0.000465804	432.626	6.39664	448.726	8.02357	532	35.1387	18.6794	3.58805	0.000259035
OUR029-23OUTERRIM	Kowaliga	0.0694723	0.000289987	0.541146	0.00450845	0.0564938	0.000407304	432.962	3.4953	439.157	5.93181	471.5	31.911	8.17356	1.41082	0.000167017
OUR029-24CORE	Kowaliga	0.0723937	0.00050655	0.548392	0.00550044	0.0549401	0.00039476	450.546	6.08835	443.92	7.20085	409.5	32.1466	-10.0235	-1.49257	3.15838e-05
OUR029-24OUTERRIM	Kowaliga	0.0743198	0.000296726	0.575965	0.00524443	0.056207	0.000459937	462.114	3.56038	461.842	6.74633	460.5	36.283	-0.350391	-0.0588919	0.00138647
OUR029-25CORE	Kowaliga	0.06669	0.000568968	0.5198	0.00614098	0.0565293	0.000461893	416.17	6.87493	424.996	8.18867	473	36.154	12.0149	2.07675	0.000168286
OUR029_25INNERRIM	Kowaliga	0.0823838	0.00123447	1.66528	0.0820386	0.146604	0.00687852	510.319	14.6956	995.34	61.562	2306.5	161.119	77.8747	48.7292	0.00729767
OUR029-25OUTERRIM	Kowaliga	0.0702547	0.000279708	0.537997	0.00460817	0.0555396	0.000421179	437.676	3.36895	437.081	6.07521	434	33.779	-0.846935	-0.136118	0.000124692
OUR029-26	Kowaliga	0.0702789	0.000375574	0.538133	0.00490428	0.0555345	0.000409929	437.822	4.52332	437.17	6.4644	433.5	32.8869	-0.996935	-0.148961	0.000203911
OUR029-27CORE	Kowaliga	0.0709741	0.000518632	0.634164	0.0196338	0.0648038	0.00194943	442.007	6.2418	498.661	24.2521	767.5	126.737	42.4095	11.3612	0.000531867
OUR029-27OUTERRIM	Kowaliga	0.0672182	0.000334926	0.530253	0.00630612	0.057213	0.000617768	419.361	4.0454	431.956	8.3511	499.5	47.5606	16.0438	2.91577	0.000502235
OUR029-28CORE	Kowaliga	0.0586757	0.00111549	0.823048	0.0203977	0.101734	0.00161677	367.555	13.5772	609.717	22.5945	1655.5	58.8918	77.7979	39.7171	0.00413637
OUR029-28OUTERRIM	Kowaliga	0.0452933	0.00168453	0.363802	0.0138911	0.0582546	0.000502372	285.551	20.7599	315.034	20.5788	539	37.7314	47.0221	9.35868	0.000459481
OUR029-29	Kowaliga	0.0721874	0.000316867	0.549271	0.00467912	0.0551853	0.000402868	449.306	3.80957	444.497	6.12378	419.5	32.6034	-7.10523	-1.08209	0.000119342
OUR029-30CORE	Kowaliga	0.0694885	0.00026748	0.537401	0.00491235	0.0560898	0.00046501	433.06	3.224	436.687	6.4781	455.5	36.7977	4.92655	0.830778	0.000763003
OUR029-30OUTERRIM	Kowaliga	0.0717724	0.000364741	0.549828	0.00488476	0.0555607	0.000404842	446.811	4.38674	444.861	6.39019	434.5	32.4586	-2.8333	-0.43819	0.000119889
OUR029-31	Kowaliga	0.0535304	0.000656902	0.436918	0.00720701	0.0591967	0.000652329	336.149	8.03623	368.058	10.1595	574	47.9292	41.4374	8.66947	0.000570317
OUR029-32CORE	Kowaliga	0.0708978	0.000439952	0.554547	0.0068608	0.0567288	0.000607112	441.548	5.29545	447.948	8.94236	481	47.2839	8.20206	1.42873	0.000552401
OUR029-32OUTERRIM	Kowaliga	0.0689357	0.00037416	0.557114	0.0054754	0.0586136	0.000480204	429.727	4.51194	449.624	7.12805	552.5	35.7622	22.2214	4.42524	0.000496611
OUR029-33	Kowaliga	0.0610327	0.000379191	0.511898	0.0113858	0.0608303	0.00129903	381.89	4.60665	419.703	15.2352	633	91.9637	39.6698	9.00948	0.000574125
OUR029-34	Kowaliga	0.07024	0.000413584	0.534191	0.00513213	0.0551582	0.000418685	437.587	4.98118	434.565	6.78158	418.5	33.9046	-4.56089	-0.695472	0.00017042
OUR029-35	Kowaliga	0.0564912	0.000441279	0.47514	0.00608661	0.0610013	0.00061925	354.24	5.38382	394.713	8.36153	639	43.6738	44.5634	10.2538	0.00052597
RED002_001a	Kowaliga	0.0705056	0.000751077	0.619076	0.00906809	0.0636824	0.000640099	439.187	9.04227	489.243	11.3416	731	42.5907	39.9198	10.2314	0.00626562
RED002_001b	Kowaliga	0.0489747	0.000735992	0.42167	0.00702038	0.0624452	0.000447242	308.214	9.04254	357.226	10.003	689	30.5613	55.2665	13.7203	0.0113868
RED002_004	Kowaliga	0.0654466	0.000569089	0.52022	0.00507992	0.0576499	0.000256086	408.651	6.88441	425.277	6.77429	516	19.513	20.804	3.90937	0.00412705
RED002_009	Kowaliga	0.0245378	0.000191092	0.398342	0.01309	0.117739	0.00375838	156.266	2.40441	340.428	18.9208	1922	114.447	91.8696	54.097	0.0308438
RED002_017	Kowaliga	0.0705487	0.000520493	0.541133	0.00449405	0.0556306	0.000212073	439.446	6.26668	439.149	5.91294	437.5	16.9714	-0.444836	-0.067617	0.00160621
RED002_021	Kowaliga	0.05703	0.00205847	0.528406	0.0223792	0.0671991	0.00148738	357.526	25.0824	430.729	29.5177	843.5	92.1247	57.614	16.9951	0.00771105
RED002_033	Kowaliga	0.0685014	0.000351388	0.565569	0.00762605	0.0598804	0.000746649	427.107	4.2391	455.122	9.86756	599	54.0033	28.6967	6.15543	0.005126
RED002_034	Kowaliga	0.0511934	0.0015142	0.480813	0.0163837	0.0681177	0.00115147	321.834	18.5577	398.61	22.3439	872	70.0309	63.0924	19.2609	0.00340678
RED002_049	Kowaliga	0.0463496	0.000602338	0.589549	0.0117198	0.0922512	0.00138741	292.062	7.41947	470.556	14.9172	1472.5	57.0752	80.1656	37.9326	0.00853971
RED002_057	Kowaliga	0.0694119	0.000419854	0.559028	0.0078975	0.0584115	0.000745654	432.597	5.06061	450.871	10.2607	545	55.793	20.6243	4.05292	0.0218848
RED002_060bcore	Kowaliga	0.0574477	0.000719945	0.547579	0.0588252	0.0691309	0.00737453	360.074	8.77459	443.387	75.7569	902.5	439.831	60.1026	18.7902	0.0280636
RED002_060brim	Kowaliga	0.0697088	0.000372583	0.582119	0.012505	0.0605651	0.00126003	434.387	4.48969	465.799	15.9871	623.5	89.7392	30.3308	6.74357	0.0106723
RED002_069	Kowaliga	0.0658235	0.000977512	0.543566	0.00894139	0.0598921	0.000423495	410.931	11.8188	440.751	11.7291	599.5	30.6208	31.4544	6.76562	0.00688212
RED002_078core	Kowaliga	0.0694544	0.00039036	0.551733	0.00574715	0.0576139	0.000505235	432.854	4.70498	446.108	7.50707	515	38.5214	15.9507	2.97111	0.0173228
RED002_078rim	Kowaliga	0.0692777	0.000371281	0.554894	0.00375734	0.0580919	0.000240387	431.789	4.4758	448.175	4.90109	533	18.1226	18.989	3.65624	0.010518
RED003_1	Kowaliga	0.065648	0.00223707	0.622848	0.0252952	0.0688112	0.0015189	409.869	27.0361	491.606	31.4076	893	91.1433	54.102	16.6264	0.00112719
RED003_2	Kowaliga	0.046403	0.00178186	1.34027	0.115078	0.209481	0.0160775	292.39	21.9351	863.303	97.4764	2901.5	248.813	89.9228	66.1312	0.0123401
RED003_3	Kowaliga	0.0692228	0.00198929	0.574267	0.016812	0.0601677	0.000335427	431.458	23.9641	460.747	21.571	609.5	24.1008	29.2112	6.35698	0.000311186
RED003_4	Kowaliga	0.0656577	0.00201017	0.756592	0.0286901	0.0835746	0.00186851	409.929	24.2963	572.013	32.8986	1282.5	87.1101	68.0368	28.3358	0.0022567
RED003_5	Kowaliga	0.0697556	0.00196739	0.55027	0.0157942	0.0572131	0.000304096	434.669	23.6887	445.151	20.5838	499.5	23.4117	12.9792	2.35465	0.000494951
RED003_6core	Kowaliga	0.0611627	0.00174449	0.638148	0.0212589	0.0756716	0.00130145	382.68	21.177	501.133	26.1832	1086	68.9613	64.7624	23.637	0.00186009
RED003_6rim	Kowaliga	0.0539127	0.00158019	0.689405	0.0334031	0.0927432	0.00357625	338.488	19.3158	532.416	39.7587	1482.5	146.149	77.1678	36.4242	0.00264446
RED003_7	Kowaliga	0.0639794	0.00180353	0.491703	0.0140408	0.0557393	0.000253456	399.768	21.8352	406.05	19.0245	441.5	20.2326	9.45228	1.54704	0.000110082
RED003_8	Kowaliga	0.0716019	0.00202246	0.566569	0.016392	0.0573887	0.000358789	445.785	24.3092	455.77	21.1377	506.5	27.5016	11.9871	2.19075	0.000722449
RED003_9	Kowaliga	0.0703164	0.0020127	0.558743	0.0162332	0.0576307	0.000286178	438.048	24.2211	450.685	21.0386	515.5	21.8126	15.0247	2.80401	0.000130596
RED003_10core	Kowaliga	0.0417871	0.00139464	0.548529	0.0270904	0.0952042	0.0034635	263.892	17.2475	444.01	35.2178	1532	136.973	82.7747	40.5662	0.00317925
RED003_10rim	Kowaliga	0.0636225	0.00178862	0.541435	0.0154683	0.0617212	0.000313102	397.605	21.6621	439.348	20.2762	664	21.7362	40.1197	9.50103	0.000477231
RED003_11	Kowaliga	0.0490942	0.00159112	0.562357	0.0209732	0.0830769	0.00153166	308.948	19.5386	453.036	27.0784	1271	71.946	75.6925	31.805	0.00249765
RED003_12core	Kowaliga	0.0704439	0.00198839	0.567399	0.0166597	0.0584176	0.000471571	438.815	23.926	456.308	21.4698	545	35.2849	19.4834	3.83349	0.00337906
RED003_13	Kowaliga	0.0552125	0.00181931	0.91734	0.0380096	0.120501	0.0030247	346.433	22.2089	660.919	39.8623	1963.5	89.5535	82.3563	47.5831	0.00550706
RED003_14	Kowaliga	0.0635661	0.00211663	0.567524	0.025597	0.0647525	0.00196851	397.264	25.632	456.389	32.8921	766	128.1	48.1379	12.9549	0.000737403
RED003_14R	Kowaliga	0.0709615	0.00200685	0.556813	0.0160817	0.0569095	0.000332844	441.931	24.1362	449.427	20.8689	488	25.8098	9.44028	1.66781	-0.000698192
RED003_15	Kowaliga	0.069904	0.00198721	0.555617	0.0162083	0.0576464	0.000376675	435.563	23.9238	448.647	21.0484	516	28.7014	15.5885	2.91622	0.000189074
RED003_16	Kowaliga	0.0451597	0.00191286	1.89754	0.123101	0.304746	0.0149621	284.727	23.5742	1080.17	84.4894	3494.5	151.804	91.8521	73.6406	0.0202927
RED003_17c	Kowaliga	0.0505554	0.00147777	0.445315	0.0134486	0.0638849	0.000484142	317.92	18.1224	373.974	18.8079	737.5	32.081	56.8922	14.9887	0.000756905
RED003_17r	Kowaliga	0.0611749	0.00174483	0.521896	0.015615	0.0618741	0.000558473	382.755	21.1808	426.396	20.7289	669.5	38.6358	42.8298	10.2349	0.000432655
RED003_18	Kowaliga	0.046083	0.00162577	0.753073	0.0401193	0.118521	0.00472798	290.419	20.0212	569.977	45.9482	1934	142.808	84.9835	49.0473	0.00503482
RED003_19	Kowaliga	0.0682646	0.00191775	0.54098	0.0154559	0.0574756	0.000298228	425.678	23.1237	439.048	20.2659	509.5	22.8167	16.4517	3.04514	0.000225544
RED003_20c	Kowaliga	0.0569666	0.00168374	0.46681	0.0143983	0.0594317	0.000523288	357.14	20.5212	388.963	19.8359	582.5	38.2431	38.6884	8.18155	0.000616211
RED003_20r	Kowaliga	0.0674318	0.00197525	0.544232	0.0163839	0.0585354	0.000405764	420.651	23.835	441.189	21.4313	549.5	30.2754	23.4484	4.65517	0.000170607
RED003_21	Kowaliga	0.0721011	0.00204518	0.756318	0.0298669	0.0760783	0.00208899	448.787	24.5706	571.855	34.242	1097	109.905	59.0896	21.5207	0.00184171
RED003_22	Kowaliga	0.01548	0.000483509	0.851595	0.0271295	0.39899	0.00249525	99.0226	6.13711	625.492	29.5373	3905	18.8101	97.4642	84.1689	0.0297452
RED003_24	Kowaliga	0.0524826	0.00151071	0.555174	0.0256497	0.0767207	0.00277108	329.735	18.4922	448.358	33.2188	1113.5	144.239	70.3875	26.4572	0.00152644
RED003_25	Kowaliga	0.0688556	0.0019342	0.533305	0.0152077	0.0561739	0.000275012	429.244	23.309	433.978	20.0414	459	21.7151	6.48284	1.09097	9.08282e-05
RED003_26C	Kowaliga	0.0410328	0.00136912	0.38897	0.0133145	0.0687515	0.0005242	259.223	16.9444	333.599	19.373	891	31.4956	70.9065	22.295	0.00133581
RED003_26R	Kowaliga	0.0705007	0.00199411	0.572111	0.0166191	0.0588553	0.000388742	439.157	23.9934	459.355	21.3538	561.5	28.7876	21.7886	4.39708	0.000279201
RED003_27C	Kowaliga	0.0686009	0.00239659	1.48416	0.212689	0.156909	0.0217963	427.707	28.8819	923.884	166.818	2422.5	471.28	82.3444	53.7055	0.00290195
RED003_27R	Kowaliga	0.0553009	0.00171726	0.503623	0.0160472	0.0660498	0.000470709	346.973	20.9623	414.131	21.5571	807.5	29.8322	57.0312	16.2166	0.00091654
RED003_28C	Kowaliga	0.0702969	0.00199801	0.56497	0.0164921	0.0582892	0.000387206	437.93	24.0449	454.733	21.2878	540.5	29.0543	18.9769	3.69519	0.000794824
RED003_28R	Kowaliga	0.0614168	0.0017893	0.638624	0.0232069	0.0754149	0.00163681	384.224	21.7153	501.429	28.5573	1079.5	87.0976	64.4073	23.3743	0.00173841
RED003_29	Kowaliga	0.044586	0.00140432	1.04477	0.0479272	0.16995	0.00566452	281.187	17.3206	726.252	47.0473	2557	111.572	89.0032	61.2824	0.00964348
RED003_30	Kowaliga	0.0651041	0.00185002	0.567955	0.0176002	0.063271	0.000781322	406.579	22.3739	456.668	22.6671	717	52.4511	43.2945	10.9685	0.000700633
RED003_31C	Kowaliga	0.0570843	0.00170633	0.550875	0.0178585	0.0699899	0.000877268	357.857	20.7939	445.547	23.2497	928	51.4727	61.4378	19.6814	0.00138213
RED003_31R1	Kowaliga	0.0715943	0.00213166	0.570897	0.0173346	0.0578333	0.000343628	445.739	25.6206	458.571	22.2853	523	26.0688	14.7726	2.79822	0.000363276
RED003_31R2	Kowaliga	0.0701804	0.00197562	0.563633	0.0162151	0.0582478	0.000344883	437.228	23.7782	453.865	20.9498	539	25.9029	18.8816	3.66568	-0.00222805
RED003_32	Kowaliga	0.0420761	0.00150211	0.581444	0.0343771	0.100224	0.00472037	265.68	18.5705	465.365	43.6692	1628	175.127	83.6806	42.9094	0.00358161
RED003_33	Kowaliga	0.0251234	0.000872357	1.04715	0.0407676	0.302295	0.0053166	159.95	10.9665	727.434	40.0418	3482	54.4285	95.4064	78.0118	0.0215701
RED003_34	Kowaliga	0.0632967	0.00193818	0.639238	0.0242294	0.0732453	0.00163504	395.631	23.4789	501.809	29.7953	1020.5	90.3872	61.2317	21.1591	0.00137055
RED003_35C	Kowaliga	0.0677366	0.00193036	0.560642	0.0165368	0.060029	0.000455991	422.491	23.2872	451.921	21.4041	604.5	32.8667	30.109	6.51221	0.000543925
RED003_35R	Kowaliga	0.0661776	0.00186451	0.520013	0.0149234	0.0569904	0.000310413	413.073	22.5263	425.139	19.8397	491	24.0254	15.8712	2.83813	0.000756916
RED003_36C	Kowaliga	0.0623121	0.00211133	1.34341	0.16424	0.156363	0.0183582	389.659	25.598	864.665	137.555	2416.5	398.592	83.8751	54.9352	0.00435682
RED003_36R	Kowaliga	0.0618615	0.0018516	0.700848	0.037001	0.0821679	0.0035716	386.924	22.4614	539.27	43.7023	1249.5	170.144	69.0337	28.2505	0.00192257
RED003_37C	Kowaliga	0.0566729	0.00165814	0.523017	0.015744	0.0669329	0.000472945	355.348	20.215	427.143	20.884	835.5	29.4431	57.4688	16.8082	0.00100464
RED003_37R	Kowaliga	0.0581855	0.00177841	0.537255	0.0180312	0.0669675	0.000927422	364.57	21.6491	436.591	23.6801	836.5	57.6996	56.4173	16.4963	0.000988553
RED003_38C	Kowaliga	0.0370734	0.00114591	0.559226	0.0200965	0.109402	0.00200369	234.659	14.2376	451	26.0055	1789	66.7402	86.8832	47.9691	0.0049029
RED003_38R	Kowaliga	0.0713145	0.00202601	0.569809	0.0164675	0.0579495	0.000306592	444.056	24.3583	457.868	21.191	527.5	23.1936	15.8187	3.01655	0.000326896
RED003_39	Kowaliga	0.0484553	0.0015335	0.493902	0.0214675	0.0739261	0.00220103	305.021	18.843	407.545	28.9731	1039	120.23	70.6428	25.1565	0.00106509
RED003_40	Kowaliga	0.0579545	0.00171929	0.568037	0.018395	0.0710867	0.000922071	363.162	20.9345	456.721	23.6836	959.5	53.0171	62.1509	20.485	0.00142681
RED003_41	Kowaliga	0.0623966	0.00182378	0.8533	0.040407	0.0991834	0.00369325	390.172	22.113	626.427	43.7982	1608.5	138.814	75.7431	37.7147	0.00335605
RED003_42	Kowaliga	0.00390137	0.000403015	0.0496548	0.00514207	0.0923089	0.000656744	25.1001	5.1746	49.2044	9.92357	1473.5	26.9993	98.2966	48.9881	0.00392063
RED003_43	Kowaliga	0.0613109	0.00172771	0.535648	0.0157996	0.0633637	0.000551424	383.58	20.9705	435.529	20.7858	720	36.9474	46.725	11.9277	0.000733439
RED003_44	Kowaliga	0.0403484	0.00141985	0.534149	0.0260372	0.0960139	0.00323628	254.984	17.5833	434.537	34.1748	1548	126.634	83.5282	41.3205	0.00331761
RED005-1core	Kowaliga	0.0612869	0.00185256	0.48521	0.0149931	0.0574197	0.000367387	383.435	22.4851	401.621	20.3966	507.5	28.143	24.4464	4.52817	0.000219768
RED005-1rim	Kowaliga	0.0707399	0.00199659	0.542856	0.0155628	0.0556568	0.00027907	440.598	24.0179	440.283	20.3807	438.5	22.319	-0.478357	-0.0713644	0.000280629
RED005-2core	Kowaliga	0.0603605	0.00174182	0.562114	0.0169262	0.0675414	0.000580094	377.805	21.1606	452.878	21.8847	854.5	35.6778	55.7864	16.5769	0.00115046
RED005-2innerrim	Kowaliga	0.0583939	0.00168499	0.529252	0.0156838	0.0657345	0.000442687	365.839	20.5088	431.291	20.7201	797.5	28.2356	54.1268	15.1759	0.000905371
RED005-2outerrim	Kowaliga	0.0705593	0.00199796	0.549893	0.0159908	0.0565227	0.000373603	439.51	24.0383	444.904	20.8438	472.5	29.2523	6.98199	1.21237	0.000182562
RED005-3core	Kowaliga	0.0559307	0.00203845	0.452733	0.0173367	0.0587071	0.000688652	350.819	24.8645	379.172	24.0901	556	51.1734	36.9031	7.47769	0.000316067
RED005-3innerrim	Kowaliga	0.0693364	0.00196903	0.549554	0.0169741	0.057484	0.000697528	432.143	23.7177	444.682	22.1233	510	53.3494	15.2661	2.81973	0.00238282
RED005-3outerrim	Kowaliga	0.069113	0.00197677	0.550187	0.0172937	0.0577363	0.000751862	430.796	23.8158	445.096	22.5284	519.5	57.164	17.0749	3.21291	0.0010379
RED005_4	Kowaliga	0.0665724	0.00187546	0.552971	0.016364	0.060243	0.000545103	415.459	22.6501	446.918	21.2856	612	39.1045	32.1146	7.03924	0.000703205
RED005_5	Kowaliga	0.0676557	0.00190552	0.525673	0.015071	0.056352	0.000301194	422.003	22.9895	428.912	19.961	466	23.6787	9.44149	1.61088	0.000409363
RED005_6	Kowaliga	0.0682205	0.00191954	0.543502	0.0155747	0.057781	0.000313028	425.412	23.1462	440.709	20.3877	521	23.7772	18.347	3.47091	0.000297006
RED005_7core	Kowaliga	0.0652739	0.00218016	2.03869	0.120572	0.226522	0.0110495	407.606	26.3583	1128.47	79.0171	3027.5	156.442	86.5365	63.8796	0.014102
RED005_7innerrim	Kowaliga	0.0672121	0.00193128	0.521661	0.0152156	0.056291	0.000281346	419.324	23.3096	426.239	20.2044	463.5	22.1529	9.53098	1.62224	-0.00222129
RED005_7outerrim	Kowaliga	0.0675387	0.00192778	0.768807	0.0273692	0.0825588	0.0017552	421.296	23.2603	579.049	31.1804	1258.5	83.1233	66.5239	27.2434	0.00228878
RED005_8core	Kowaliga	0.0660716	0.00189062	0.521651	0.0153526	0.0572617	0.0003934	412.431	22.8438	426.232	20.3856	501.5	30.2491	17.7604	3.23787	0.00152846
RED005_8rim	Kowaliga	0.067811	0.00192706	0.522406	0.0150493	0.0558736	0.000263139	422.94	23.2457	426.735	19.9749	447	20.9337	5.38245	0.889315	0.00138233
RED005_10	Kowaliga	0.0593051	0.00179039	0.558736	0.0181905	0.0683303	0.000831773	371.386	21.7718	450.68	23.5607	878.5	50.3773	57.725	17.5944	0.00117638
RED005-11core	Kowaliga	0.0545392	0.00157706	0.526734	0.0159883	0.0700456	0.000645642	342.318	19.2662	429.618	21.1549	929.5	37.8459	63.1718	20.3202	0.00149284
RED005-11rim	Kowaliga	0.0615961	0.00175361	0.54044	0.0159058	0.0636346	0.000474076	385.313	21.2789	438.693	20.8601	729.5	31.574	47.1813	12.168	0.00100188
RED005-12	Kowaliga	0.0712661	0.00201747	0.542594	0.0155555	0.0552193	0.000249367	443.765	24.2569	440.111	20.3746	421	20.162	-5.4073	-0.830111	3.06198e-05
RED005-13	Kowaliga	0.0722781	0.002086	0.571375	0.0167685	0.057334	0.000304505	449.852	25.0565	458.88	21.5548	504	23.3773	10.7437	1.96744	0.000177586
RED005-14core	Kowaliga	0.065047	0.00184353	0.514828	0.0151175	0.0574028	0.000440273	406.233	22.2967	421.669	20.1649	507	33.7369	19.8751	3.66067	0.001118
RED005-14rim	Kowaliga	0.0710567	0.00208487	0.550674	0.0164654	0.0562067	0.000322845	442.505	25.0714	445.415	21.4483	460.5	25.4681	3.90775	0.653453	0.00616789
RED005-15rim	Kowaliga	0.0736122	0.0021369	0.752457	0.0274435	0.0741363	0.00163576	457.867	25.6353	569.62	31.5538	1045	89.007	56.185	19.619	0.00153562
RED005-16	Kowaliga	0.0651251	0.00183913	0.556487	0.016039	0.0619734	0.00035636	406.706	22.2419	449.215	20.8181	673	24.5989	39.5683	9.46299	0.0007043
RED005-17RIM	Kowaliga	0.06707	0.00191208	0.543848	0.0158489	0.0588095	0.000354654	418.465	23.0812	440.936	20.7402	560	26.2881	25.274	5.09608	0.00036852
RED005-17core	Kowaliga	0.066833	0.0018794	0.525888	0.0154599	0.057069	0.000488378	417.034	22.6921	429.055	20.4706	494	37.7287	15.5802	2.80181	0.000901713
RED005-18core	Kowaliga	0.0539791	0.0016099	0.673128	0.0368243	0.0904421	0.00414566	338.894	19.6775	522.586	44.2086	1434.5	174.882	76.3755	35.1506	0.00254098
RED005-18rim	Kowaliga	0.0699377	0.00197641	0.544722	0.0159647	0.0564888	0.000438144	435.766	23.7932	441.511	20.8792	471.5	34.3272	7.57879	1.30121	0.00411821
RED005-19core	Kowaliga	0.0643743	0.00206185	0.720869	0.0254217	0.0812162	0.0011972	402.16	24.9504	551.152	29.7787	1226.5	57.8961	67.2108	27.0328	0.00229821
RED005-19rim	Kowaliga	0.0686644	0.00195862	0.546483	0.0171823	0.0577223	0.000762694	428.09	23.6072	442.667	22.4374	519	58.0058	17.5163	3.29305	-0.00430154
RED005-20core	Kowaliga	0.0534988	0.0017484	0.45283	0.0149779	0.0613889	0.000311926	335.956	21.3787	379.24	20.8278	652.5	21.8124	48.5125	11.4134	0.000637747
RED005-20outerrim	Kowaliga	0.0672369	0.00191951	0.543015	0.0161601	0.0585737	0.000491569	419.474	23.1672	440.388	21.1567	551	36.643	23.8704	4.749	0.00215828
RED005-20outerouterrim	Kowaliga	0.0676255	0.00191701	0.532606	0.0155379	0.0571208	0.000393032	421.82	23.1286	433.515	20.4836	496	30.3249	14.9555	2.6977	0.00115073
JKG013_01	Coley Creek	0.0685837	0.000279529	0.530445	0.00366311	0.0560942	0.000312687	427.604	1.68603	432.083	2.42729	456	12.3681	6.2273	1.03673	0.000536808
JKG013_02	Coley Creek	0.0746297	0.000419402	0.574561	0.00435594	0.0558371	0.000284104	463.973	2.51531	460.937	2.80498	445.5	11.3113	-4.14657	-0.658737	0.000696155
JKG013_03	Coley Creek	0.0756302	0.000444413	0.580859	0.00447454	0.0557024	0.000277427	469.972	2.6628	464.99	2.86979	440.5	11.08	-6.6905	-1.07143	0.000643663
JKG013_03	Coley Creek	0.0738255	0.000811243	0.56846	0.00683492	0.055846	0.000272427	459.147	4.86808	456.995	4.41492	446	10.8431	-2.94774	-0.4709	0.000787709
JKG013_04	Coley Creek	0.0748101	0.000516032	0.572085	0.00482852	0.0554624	0.000269709	465.055	3.09418	459.339	3.11372	430.5	10.8391	-8.02677	-1.2445	0.000385391
JKG013_05	Coley Creek	0.0754721	0.000852174	0.578008	0.0073135	0.0555451	0.00031705	469.024	5.10577	463.157	4.69483	434	12.7138	-8.0701	-1.26678	0.000298226
JKG013_19	Coley Creek	0.0753314	0.000668795	0.598276	0.0060887	0.0576002	0.000286502	468.181	4.00793	476.115	3.8606	514.5	10.9255	9.00274	1.66639	0.000981608
JKG013_020	Coley Creek	0.0749957	0.000720393	0.585981	0.00668991	0.056669	0.000349551	466.168	4.31839	468.274	4.27382	478.5	13.6334	2.57723	0.449708	0.000634497
JKG013_021	Coley Creek	0.0569009	0.000419162	0.451087	0.00432334	0.0574962	0.000352467	356.739	2.55603	378.021	3.02056	510.5	13.4747	30.1196	5.62973	0.000728006
JKG013_022	Coley Creek	0.0708512	0.000413604	0.549142	0.00424196	0.0562128	0.000284342	441.268	2.4893	444.412	2.77645	460.5	11.2154	4.17636	0.707377	0.000664678
JKG013_023a	Coley Creek	0.0707009	0.000599702	0.579575	0.00677483	0.0594543	0.000478112	440.363	3.60953	464.165	4.34547	583.5	17.4598	24.5308	5.12787	0.000921053
JKG013_023b	Coley Creek	0.0731798	0.000298843	0.558214	0.00353059	0.0553233	0.000267177	455.27	1.79479	450.34	2.29793	425	10.7741	-7.12226	-1.09453	0.000404834
JKG013_024	Coley Creek	0.0736637	0.000602827	0.568178	0.00547011	0.0559409	0.000283629	458.176	3.61832	456.812	3.53551	450	11.2608	-1.81686	-0.298548	0.000783612
JKG013_025	Coley Creek	0.0725715	0.000525691	0.564039	0.00511581	0.0563692	0.000307621	451.615	3.15865	454.129	3.31562	466.5	12.0882	3.19078	0.553572	0.00115854
JKG013_026a	Coley Creek	0.0632696	0.00165524	0.488822	0.0130456	0.0560344	0.000294921	395.466	10.0273	404.087	8.85795	453.5	11.6836	12.7969	2.13347	0.000443314
JKG013_026b	Coley Creek	0.0573482	0.00138098	0.444967	0.0109519	0.0562739	0.000285965	359.467	8.41378	373.73	7.66652	463	11.2618	22.3614	3.81647	0.000995176
JKG013_026b	Coley Creek	0.0722976	0.0004276	0.617205	0.00790957	0.0619162	0.000703839	449.968	2.57004	488.069	4.95377	671	24.3231	32.9406	7.80637	0.00141272
JKG013_026c	Coley Creek	0.0727355	0.000653313	0.558145	0.00574522	0.0556543	0.000279739	452.601	3.92465	450.295	3.73687	438.5	11.1862	-3.21566	-0.511988	0.000882103
JKG013_027	Coley Creek	0.072318	0.000404147	0.560078	0.00421039	0.0561695	0.000282393	450.091	2.42906	451.554	2.73652	459	11.1489	1.94091	0.323971	0.00104539
JKG013_028a	Coley Creek	0.0740047	0.000732557	0.572576	0.00629548	0.0561141	0.000268465	460.223	4.39533	459.656	4.05655	456.5	10.6156	-0.815509	-0.123356	0.000576643
JKG013_028b	Coley Creek	0.0647856	0.00138387	0.504457	0.0111359	0.0564735	0.000314163	404.651	8.3725	414.694	7.48774	471	12.3107	14.0869	2.42191	0.000419813
JKG013_027b	Coley Creek	0.0727882	0.000348818	0.564575	0.00397892	0.0562548	0.000290673	452.917	2.09565	454.477	2.57884	462	11.4544	1.96598	0.343212	0.000917797
JKG013_030a	Coley Creek	0.0653205	0.000466885	0.536472	0.00552659	0.0595657	0.000441838	407.888	2.82448	436.074	3.64553	587.5	16.0946	30.5722	6.46352	0.000982715
JKG013_030b	Coley Creek	0.0745105	0.000292553	0.57092	0.00361835	0.055572	0.000276453	463.258	1.75484	458.586	2.33596	435	11.079	-6.49613	-1.01875	0.00133922
JKG013_030c	Coley Creek	0.0753933	0.000681789	0.666519	0.0340605	0.0641178	0.00322441	468.552	4.08554	518.568	20.5422	745.5	106.289	37.1493	9.645	0.00152178
JKG013_030d	Coley Creek	0.0525681	0.00206162	0.501873	0.0221941	0.069242	0.00141321	330.259	12.6136	412.948	14.8944	905.5	42.0622	63.5275	20.0242	0.00248365
JKG013_032Core	Coley Creek	0.0608909	0.00111114	0.516858	0.0108602	0.0615626	0.000640956	381.029	6.74801	423.029	7.24356	658.5	22.3257	42.1368	9.92831	0.00186009
JKG013_032Core	Coley Creek	0.0765895	0.000506036	0.588304	0.00488396	0.0557097	0.000279978	475.718	3.02924	469.76	3.1173	440.5	11.1819	-7.99509	-1.26833	0.000567125
JKG013_032Rim	Coley Creek	0.0650417	0.00138398	0.501412	0.0109572	0.0559115	0.000277933	406.201	8.37113	412.637	7.38293	448.5	11.045	9.43125	1.55969	0.000678987
JKG013_032Rim	Coley Creek	0.0770023	0.000683367	0.59334	0.00606745	0.0558853	0.000283849	478.19	4.08887	472.974	3.85905	447.5	11.2871	-6.85802	-1.10272	0.00101014
JKG013_033	Coley Creek	0.0726493	0.00035944	0.569902	0.00401039	0.0568942	0.000284671	452.082	2.15973	457.928	2.5904	487	11.0441	7.16995	1.27658	0.000685546
JKG013_036Core	Coley Creek	0.0734738	0.000465259	0.566677	0.00478272	0.0559373	0.000312077	457.036	2.79327	455.84	3.09486	449.5	12.3941	-1.6765	-0.262341	0.000769435
JKG013_036Rim	Coley Creek	0.0786349	0.000437316	0.642945	0.00817443	0.0593004	0.000677933	487.954	2.61299	504.103	5.03923	578	24.8427	15.579	3.2035	0.0011119
JKG013_037	Coley Creek	0.0753292	0.000643021	0.58301	0.00590914	0.0561321	0.00030668	468.168	3.85352	466.37	3.78302	457.5	12.1191	-2.33174	-0.385371	0.000891334
JKG013_038	Coley Creek	0.0706076	0.000795493	0.569912	0.00717383	0.0585404	0.000328521	439.801	4.78794	457.935	4.62906	550	12.2522	20.0362	3.95991	0.000917707
JKG013_039a	Coley Creek	0.0724902	0.00166206	0.55334	0.0134857	0.0557219	0.000501727	387.302	8.14293	395.138	7.65499	441	20.0319	12.1763	1.98298	0.000697907
JKG013_039b	Coley Creek	0.065111	0.00123356	0.497533	0.0102651	0.055362	0.000456991	451.126	9.98207	447.16	8.7768	426.5	18.4113	-5.77408	-0.887071	0.000493325
JKG013_040a	Coley Creek	0.0743453	0.00135846	0.570334	0.0114427	0.05542	0.00045245	406.62	7.46138	410.01	6.936	429	18.2	5.21673	0.826809	0.00053019
JKG013_040b	Coley Creek	0.0718142	0.00139906	0.549768	0.0116309	0.0556383	0.000460719	462.267	8.14576	458.207	7.37169	437.5	18.4348	-5.661	-0.886035	0.000569377
RAS021_001	Coley Creek	0.0638029	0.000931377	1.00074	0.0555201	0.0555223	0.000457657	447.062	8.40888	444.822	7.59154	433	18.3637	-3.24757	-0.503554	0.000525868
RAS021_002acore	Coley Creek	0.0677774	0.000870335	0.528507	0.00773824	0.0565541	0.000397684	422.737	10.5042	430.796	10.2545	474	31.1087	10.8149	1.8707	0.00112849
RAS021_002arim	Coley Creek	0.0684138	0.000898016	0.537431	0.00790437	0.0569741	0.000377842	426.578	10.8317	436.707	10.4135	490.5	29.2534	13.032	2.31931	0.0005194
RAS021_002b	Coley Creek	0.0684597	0.00080149	0.54959	0.00864407	0.058224	0.000611368	426.856	9.66743	444.706	11.2962	538	45.9465	20.6588	4.01386	0.00173365
RAS021_002c	Coley Creek	0.0603985	0.000808793	0.500907	0.00762025	0.0601492	0.000434042	378.036	9.82962	412.295	10.2838	608.5	31.206	37.8741	8.30936	0.000984233
RAS021_002d	Coley Creek	0.0701831	0.000838851	0.608777	0.0252011	0.0629107	0.0024929	437.244	10.1016	482.764	31.5633	705	168.629	37.9795	9.42898	0.000433184
RAS021_003	Coley Creek	0.159172	0.00566702	1.76702	0.0643659	0.0805144	0.000618439	952.145	62.8755	1033.38	46.6958	1209.5	30.2411	21.2778	7.86077	0.000395499
RAS021_004	Coley Creek	0.0533165	0.000669903	0.453932	0.00762594	0.0617486	0.000688415	334.84	8.1969	380.01	10.6231	665	47.7609	49.6481	11.8864	0.00058174
RAS021_005acore	Coley Creek	0.0692726	0.000819358	0.586427	0.0093084	0.0613975	0.000649756	431.758	9.87536	468.56	11.8802	653	45.422	33.8808	7.85417	0.000864357
RAS021_005arim	Coley Creek	0.0716353	0.000809587	0.682906	0.0187519	0.0691405	0.00172996	445.986	9.73614	528.503	22.5016	902.5	103.178	50.5833	15.6133	0.00116381
RAS021_005b	Coley Creek	0.0701944	0.000819645	0.552686	0.00735715	0.057105	0.000364862	437.313	9.87032	446.732	9.59924	495.5	28.1603	11.7431	2.10837	0.000414379
RAS021_006	Coley Creek	0.0659107	0.000940385	0.528493	0.00841842	0.0581543	0.000411732	411.459	11.3691	430.787	11.1535	535.5	30.9916	23.1637	4.48681	0.000437637
RAS021_007	Coley Creek	0.0697802	0.000840082	0.559578	0.00773299	0.0581603	0.000394482	434.817	10.1202	451.229	10.0439	535.5	29.6932	18.8016	3.63707	0.000374603
RAS021_008a	Coley Creek	0.0640252	0.000741931	0.525547	0.00698276	0.0595332	0.000386837	400.046	8.98658	428.828	9.27358	586.5	28.2	31.791	6.7119	0.00146486
RAS021_008b	Coley Creek	0.0689195	0.000810897	0.543596	0.00753846	0.0572048	0.000419764	429.629	9.77665	440.77	9.89302	499	32.3268	13.9021	2.52774	0.000952281
RAS021_009acore	Coley Creek	0.0589517	0.000702952	0.471686	0.0068167	0.0580303	0.000473674	369.235	8.55539	392.333	9.38411	530.5	35.766	30.3986	5.88718	0.000455687
RAS021_009arim	Coley Creek	0.0669667	0.000823245	0.513663	0.00707519	0.0556311	0.000345477	417.842	9.94363	420.888	9.46964	437.5	27.6472	4.49331	0.72372	0.000186186
RAS021_009b	Coley Creek	0.0743609	0.000892121	0.57625	0.00790503	0.0562037	0.000373749	462.36	10.7011	462.025	10.1585	460	29.493	-0.513073	-0.0725553	0.000913309
RAS021_011acore	Coley Creek	0.0596886	0.000955446	0.494698	0.00886037	0.0601101	0.000482738	373.72	11.6189	408.086	12.002	607.5	34.7289	38.4824	8.42148	0.000720274
RAS021_011arim	Coley Creek	0.0651135	0.000969647	0.544658	0.00988348	0.0606668	0.00062884	406.635	11.7315	441.468	12.9518	627	44.6871	35.1459	7.89025	0.000595806
RAS021_011bcore	Coley Creek	0.0463966	0.00200058	0.564977	0.0322113	0.0883167	0.00329105	292.351	24.6252	454.738	41.372	1389	143.061	78.9524	35.7099	0.00326865
RAS021_012acore	Coley Creek	0.0679509	0.000810774	0.596909	0.00925341	0.0637106	0.000630376	423.785	9.78403	475.246	11.7329	732	41.9171	42.1059	10.8283	0.0048322
RAS021_012arim	Coley Creek	0.0717231	0.000974767	0.547866	0.0082533	0.0554005	0.000359856	446.514	11.7207	443.575	10.7988	428	28.9689	-4.32565	-0.662553	0.000179167
RAS021_012b	Coley Creek	0.0654983	0.00133288	0.534152	0.0120265	0.0591471	0.000569429	408.964	16.1176	434.539	15.8566	572.5	41.8777	28.5652	5.88566	-0.0168549
RAS021_013core	Coley Creek	0.0613942	0.0009022	0.504704	0.00818052	0.0596222	0.000407533	384.087	10.9541	414.861	11.0101	589.5	29.6527	34.8454	7.41795	0.00136471
RAS021_013rim	Coley Creek	0.0434759	0.00185881	0.3981	0.0177667	0.0664113	0.000847963	274.333	22.9456	340.252	25.6425	819	53.3487	66.5039	19.3734	0.00156486
RAS021_014a	Coley Creek	0.0698981	0.000911896	0.535361	0.00833066	0.0555495	0.00047099	435.527	10.9838	435.339	10.9883	434	37.7738	-0.351935	-0.0432546	0.0139005
RAS021_014b	Coley Creek	0.0465547	0.00321815	0.429495	0.0325021	0.0669102	0.00205539	293.325	39.5833	362.799	45.6536	834.5	128.04	64.8502	19.1494	0.000976677
RAS021_014c	Coley Creek	0.0706887	0.000884963	0.542014	0.00755221	0.0556108	0.000340022	440.289	10.6516	439.73	9.92115	436.5	27.2276	-0.868114	-0.127302	0.000377488
RAS021_014c	Coley Creek	0.0706396	0.000884483	0.542022	0.00755319	0.0556503	0.00034025	439.994	10.6464	439.735	9.92239	438	27.2204	-0.455183	-0.0589317	0.000377488
RAS021_015core	Coley Creek	0.0658146	0.000783698	0.524333	0.00712153	0.0577808	0.000377347	410.877	9.47636	428.02	9.46496	521	28.6627	21.1368	4.00522	0.00130741
RAS021_015rim	Coley Creek	0.0529535	0.00113043	0.407706	0.00928211	0.0558407	0.00044143	332.618	13.8336	347.204	13.3458	446	35.1393	25.4219	4.201	0.000459095
RAS021_016core	Coley Creek	0.0682582	0.000861298	0.537121	0.00772825	0.057071	0.000394437	425.64	10.3905	436.503	10.1841	494	30.4714	13.8381	2.48859	0.000674109
RAS021_016rim	Coley Creek	0.0736597	0.00116219	0.574303	0.00974824	0.056547	0.000353715	458.152	13.948	460.77	12.5353	473.5	27.6779	3.24141	0.568235	0.000646049
RAS021_017	Coley Creek	0.0578782	0.00112528	0.492713	0.0110444	0.0617415	0.000688392	362.697	13.7066	406.737	14.9693	665	47.7594	45.4591	10.8276	0.000755304
RAS024_002inner	Coley Creek	0.0472979	0.000310525	0.381443	0.00339181	0.0584907	0.000350726	297.901	3.82205	328.083	4.97971	548	26.1935	45.6385	9.19947	0.00139181
RAS024_002b	Coley Creek	0.0602428	0.000801203	0.499774	0.00748255	0.0601682	0.000413538	377.09	9.73885	411.528	10.106	609.5	29.7131	38.1313	8.36843	0.00164728
RAS024_003	Coley Creek	0.049599	0.00355141	0.45757	0.0356532	0.0669088	0.00205076	312.049	43.5489	382.547	49.0737	834.5	127.751	62.6065	18.4286	0.00286941
RAS024_003b	Coley Creek	0.117274	0.00330684	1.13445	0.0323707	0.0701587	0.000305815	714.831	38.1018	769.832	30.5655	933	17.8858	23.3836	7.14461	0.00157103
RAS024_004arim	Coley Creek	0.0487919	0.000709545	0.44947	0.00863992	0.0668116	0.000839602	307.09	8.71923	376.889	12.0683	831.5	52.4029	63.0679	18.5197	0.00163223
RAS024_004acore	Coley Creek	0.0627036	0.000895402	0.594707	0.0100579	0.0687874	0.000623089	392.034	10.8582	473.845	12.7673	892	37.4132	56.05	17.2654	0.00437819
RAS024_004bcore	Coley Creek	0.137599	0.00345402	1.33792	0.0375644	0.0705198	0.000886245	831.047	39.0851	862.281	32.3683	943.5	51.4842	11.9187	3.62226	0.0056471
RAS024_004brim	Coley Creek	0.0707749	0.00131315	0.587537	0.0118509	0.060208	0.000476046	440.808	15.801	469.27	15.1025	611	34.172	27.8546	6.06499	0.0027406
RAS024_005rim	Coley Creek	0.0644495	0.000567246	0.516146	0.00519426	0.0580833	0.000283348	402.615	6.86855	422.552	6.94509	532.5	21.3682	24.3915	4.71815	0.00112081
RAS024_006core	Coley Creek	0.0598736	0.000621318	0.533145	0.0285963	0.0600147	0.00318037	374.845	7.55556	368.497	8.65746	328.5	42.8917	-14.108	-1.72261	0.00273507
RAS024_006rim	Coley Creek	0.0742259	0.000453113	0.437539	0.00614184	0.0530005	0.0005009	461.55	5.43692	462.356	5.18669	466	15.0983	0.954897	0.17424	0.000600193
RAS024_007core	Coley Creek	0.179587	0.00112231	0.576763	0.00403249	0.0563561	0.00019205	1064.68	12.2605	1110.27	10.622	1200.5	18.9661	11.3135	4.10612	0.00271474
RAS024_007rim	Coley Creek	0.0717079	0.000426047	1.98472	0.0156534	0.0801537	0.000385592	446.423	5.12423	451.573	5.35594	477.5	19.1763	6.50835	1.14051	0.000691443
RAS024_008core	Coley Creek	0.0591389	0.000361851	0.560107	0.00412026	0.0566503	0.000245681	370.374	4.40389	411.789	5.92312	651	26.9202	43.1068	10.0572	0.00196573
RAS024_009	Coley Creek	0.0557667	0.00138208	0.500159	0.00438211	0.0613385	0.000384604	349.818	16.8661	387.261	17.2743	617.5	45.5651	43.3494	9.6688	0.00103529
RAS024_010rim	Coley Creek	0.0638217	0.000578286	0.518292	0.00503479	0.0588986	0.000206191	398.813	7.00632	423.989	6.72272	563	15.2547	29.1629	5.93789	0.00136436
RAS024_010rim	Coley Creek	0.0637412	0.000578143	0.517943	0.00503572	0.0589332	0.000206275	398.325	7.00512	423.755	6.7255	564.5	15.2466	29.4376	6.00101	0.00136436
RAS024_011rim	Coley Creek	0.0642252	0.000806189	0.499455	0.00674377	0.0564013	0.000280428	401.257	9.76277	411.312	9.1124	468	22.0188	14.2613	2.44461	0.00107748
RAS024_011core	Coley Creek	0.036055	0.00245906	0.417806	0.0356934	0.0840443	0.00431664	228.326	30.5637	354.463	50.4892	1293.5	199.797	82.3482	35.5854	0.00508735
RAS024_012	Coley Creek	0.063242	0.000689568	0.521457	0.00762534	0.0598014	0.000582572	395.299	8.3587	426.102	10.152	596	42.2157	33.6747	7.22909	0.00156496
RAS024_013core	Coley Creek	0.058218	0.00132998	0.568797	0.0217036	0.0708595	0.00216476	364.768	16.1932	457.213	27.9008	953	124.99	61.7243	20.2193	0.00283325
RAS024_013rim	Coley Creek	0.0701487	0.000554425	0.548795	0.00507292	0.0567399	0.00027194	437.037	6.6776	444.184	6.64036	481	21.1796	9.13982	1.60898	0.00198001
RAS024_014core	Coley Creek	0.232608	0.00176781	2.82842	0.0238484	0.0881897	0.000321949	1348.11	18.4771	1363.03	12.6104	1386.5	14.0181	2.76903	1.09504	0.00168637
RAS024_014rim	Coley Creek	0.0733678	0.000392636	0.577351	0.00596815	0.0570733	0.00050471	456.399	4.71516	462.734	7.66882	494	38.9904	7.61155	1.36909	0.00261483
RAS024_015rim	Coley Creek	0.0641552	0.00108132	0.551206	0.0134806	0.0623133	0.00110389	400.833	13.0937	445.764	17.571	684.5	75.647	41.4415	10.0795	0.00281033
RAS024_015core	Coley Creek	0.154175	0.00603253	1.53031	0.0614994	0.0719889	0.000658316	924.292	67.2093	942.575	48.7652	985.5	37.2234	6.21088	1.93974	0.00479336
RAS024_016rim	Coley Creek	0.0757143	0.000809499	0.581766	0.00655643	0.0557275	0.000198514	470.476	9.69818	465.572	8.39971	441.5	15.8467	-6.56304	-1.0532	0.00135361
RAS024_016core	Coley Creek	0.129359	0.00211074	1.50037	0.0259751	0.0841202	0.000486384	784.182	24.0731	930.488	20.9867	1295	22.4903	39.4454	15.7236	0.00506958
RAS024_017a	Coley Creek	0.0732205	0.000607914	0.564914	0.00515909	0.0559562	0.000212804	455.515	7.3007	454.697	6.68353	450.5	16.8924	-1.11311	-0.179854	0.000885308
RAS024_017bcore	Coley Creek	0.172085	0.000971447	1.83357	0.0242462	0.0772777	0.000924	1023.55	10.6811	1057.51	17.302	1128	47.6449	9.2594	3.21063	0.0122166
RAS024_017brim	Coley Creek	0.0563669	0.00165214	0.847277	0.0461355	0.109018	0.00500028	353.482	20.1478	623.122	50.0925	1783	167.226	80.1749	43.2725	0.00689755
RAS024_018core	Coley Creek	0.0977967	0.00383875	1.18874	0.046925	0.088158	0.000366705	601.465	45.0033	795.337	43.0758	1385.5	15.9774	56.5886	24.3761	0.00269874
RAS024_018rim	Coley Creek	0.0661288	0.000951626	0.518723	0.00792123	0.056891	0.000290496	412.777	11.5026	424.277	10.5638	487	22.5401	15.2408	2.71037	0.0020244
RAS024_019	Coley Creek	0.0690842	0.000661232	0.537575	0.00553429	0.0564364	0.000213885	430.622	7.97153	436.803	7.29597	469.5	16.7781	8.28067	1.41489	0.00101704
RAS024_020core	Coley Creek	0.0692064	0.000494791	0.551203	0.00482646	0.057765	0.000291966	431.359	5.96478	445.762	6.30845	520.5	22.1843	17.1261	3.23121	0.0018687
RAS024_020rim	Coley Creek	0.0696055	0.00116601	0.544305	0.00939933	0.0567149	0.000237559	433.765	14.0468	441.236	12.3221	480	18.5135	9.63239	1.6934	0.000798697
RAS024_021core	Coley Creek	0.0684606	0.000504484	0.569492	0.00820595	0.0603318	0.00074696	426.861	6.08584	457.663	10.5895	615	53.4841	30.5918	6.73035	0.00483901
RAS024_021b	Coley Creek	0.0698684	0.000650237	0.563369	0.00604333	0.0584805	0.000311888	435.348	7.83328	453.694	7.83457	547.5	23.3002	20.4843	4.04359	0.000838863
RAS024_022	Coley Creek	0.064686	0.000729803	0.625988	0.0150402	0.0701866	0.00148856	404.048	8.83425	493.568	18.697	933.5	87.0318	56.7169	18.1374	0.00204991
RAS024_023acore	Coley Creek	0.0592778	0.00165379	0.483907	0.0146026	0.0592063	0.000680182	371.22	20.1125	400.73	19.8853	574.5	49.96	35.3838	7.36392	0.00164049
RAS024_023arim	Coley Creek	0.055016	0.00165141	0.47525	0.015179	0.0626516	0.000682815	345.232	20.1646	394.789	20.7869	696	46.4523	50.3977	12.5527	0.00140494
RAS024_023b	Coley Creek	0.0741075	0.00056269	0.573564	0.00502181	0.0561329	0.000244664	460.84	6.75214	460.293	6.47026	457.5	19.3369	-0.730043	-0.118761	0.000781629
RAS024_024outer	Coley Creek	0.0696043	0.000420369	0.574678	0.00614891	0.0598808	0.000528831	433.757	5.0659	461.012	7.91403	599	38.2491	27.5864	5.91202	0.00915977
RAS024_024core	Coley Creek	0.0675598	0.000561096	0.537355	0.00808085	0.0576861	0.000723096	421.424	6.77431	436.657	10.6459	517.5	55.0458	18.5654	3.4885	0.00493747
RAS024_024rim	Coley Creek	0.0674576	0.00046838	0.545047	0.00719477	0.0586006	0.000657808	420.807	5.65571	441.725	9.43417	552	49.0043	23.7669	4.73549	0.00579119
RAS024_025	Coley Creek	0.0674943	0.000572942	0.532576	0.0050049	0.0572286	0.000230662	421.028	6.91772	433.496	6.62068	500	17.7526	15.7944	2.8761	0.000963085
RAS024_026	Coley Creek	0.0663511	0.000644254	0.520031	0.00566727	0.0568434	0.00028119	414.121	7.78681	425.151	7.55703	485	21.8454	14.6142	2.59426	0.000735543
RAS024_027	Coley Creek	0.0735874	0.000527252	0.574657	0.00495567	0.0566374	0.000271757	457.718	6.33007	460.999	6.38074	477	21.2183	4.04234	0.711649	0.00110076
RAS024_028core	Coley Creek	0.0612538	0.000454391	0.528542	0.0104656	0.0625813	0.00114878	383.234	5.51889	430.82	13.8561	694	78.2513	44.779	11.0454	0.00307978
RAS024_028rim	Coley Creek	0.05839	0.00111599	0.489589	0.0108041	0.0608124	0.000670451	365.815	13.5869	404.61	14.6753	632.5	47.4791	42.1637	9.58832	0.0011382
RAS024_029	Coley Creek	0.0668989	0.00075846	0.539527	0.00668849	0.0584915	0.0002932	417.432	9.16198	438.09	8.80312	548	21.8972	23.8262	4.71551	0.00122263
RAS024_030	Coley Creek	0.0574328	0.000942455	0.448812	0.00755849	0.0566766	0.000214427	359.982	11.4855	376.428	10.5665	478.5	16.7264	24.7686	4.36891	0.00104214
RAS024_031	Coley Creek	0.061669	0.000586829	0.567426	0.0137519	0.066733	0.0014872	385.755	7.12421	456.325	17.7384	829	92.9707	53.4674	15.4648	0.00147782
ALX028_1CORE	Wedowee	0.234849	0.00532288	2.92767	0.0698634	0.0904135	0.000674301	1359.82	55.454	1389.02	35.8029	1434	28.4544	5.17317	2.10257	0.000128981
ALX028_1RIM	Wedowee	0.0737961	0.00156177	0.568068	0.0127596	0.0558297	0.000419743	458.971	18.7376	456.741	16.457	445.5	33.4233	-3.02372	-0.488203	0.000149317
ALX028_2	Wedowee	0.0720085	0.00152089	0.585662	0.0137652	0.0589877	0.000607845	448.23	18.2778	468.07	17.5523	566.5	44.8718	20.8772	4.23851	0.000330187
ALX028_4	Wedowee	0.0738801	0.00157504	0.56652	0.012769	0.0556142	0.000406506	459.475	18.8952	455.738	16.4852	436.5	32.5514	-5.26348	-0.820012	7.67089e-05
ALX028_5	Wedowee	0.0754365	0.00160454	0.628926	0.0154105	0.0604667	0.000735081	468.811	19.2211	495.401	19.1208	620	52.468	24.3854	5.3675	0.000569214
ALX028_6	Wedowee	0.0732628	0.00155074	0.561117	0.0125451	0.055548	0.000399472	455.768	18.6145	452.23	16.2531	434	32.038	-5.01574	-0.782313	0.0460484
ALX028_7	Wedowee	0.0703865	0.00149812	0.540285	0.0121262	0.0556714	0.000396081	438.47	18.0318	438.59	15.9242	439	31.6672	0.120828	0.0274773	0.000102658
ALX028_8	Wedowee	0.0742828	0.00158331	0.571802	0.0129251	0.0558285	0.000419735	461.892	18.9873	459.156	16.63	445.5	33.4227	-3.67946	-0.595867	0.000107722
ALX028_9	Wedowee	0.0507707	0.0029237	0.461938	0.0271662	0.0659885	0.000784022	319.241	35.8225	385.585	37.3881	806	49.7366	60.3919	17.206	0.000983187
ALX028_10	Wedowee	0.0736358	0.00155291	0.562826	0.012521	0.0554349	0.000392267	458.008	18.6342	453.341	16.2044	429.5	31.5484	-6.63757	-1.02954	0.00127938
ALX028_11INNERBANDING	Wedowee	0.0723556	0.00153197	0.554443	0.0124324	0.0555754	0.000409954	450.317	18.4049	447.88	16.1765	435	32.8582	-3.52126	-0.544237	8.57809e-05
ALX028_11OUTER	Wedowee	0.0720683	0.00153523	0.555163	0.0126254	0.0558695	0.000444461	448.59	18.4491	448.35	16.4192	447	35.3585	-0.35568	-0.053449	0.000177688
ALX028_12	Wedowee	0.0732005	0.00159661	0.578685	0.0133465	0.0573359	0.000429338	455.394	19.1659	463.592	17.0954	504	32.9609	9.64395	1.76836	0.000172663
ALX028_13	Wedowee	0.0726691	0.00153284	0.558906	0.0124778	0.0557811	0.000407597	452.202	18.41	450.791	16.1891	443.5	32.4967	-1.96207	-0.312946	7.24365e-05
ALX028_14	Wedowee	0.0738137	0.00160518	0.563376	0.0129055	0.0553554	0.000398192	459.076	19.2577	453.699	16.6941	426.5	32.0849	-7.63802	-1.18527	0.00011582
ALX028_14OUTER	Wedowee	0.0723104	0.00153103	0.556472	0.0124542	0.0558137	0.000404389	450.046	18.3945	449.205	16.1838	444.5	32.2208	-1.24763	-0.187175	0.000134578
ALX028_16A	Wedowee	0.074121	0.0015943	0.56693	0.0128696	0.0554736	0.000402145	460.921	19.1218	456.004	16.6102	431	32.3127	-6.94225	-1.07831	0.00142256
ALX028_16B	Wedowee	0.0737506	0.00157779	0.565526	0.0127866	0.0556142	0.000406506	458.698	18.9305	455.094	16.5183	436.5	32.5514	-5.08536	-0.791817	0.000164855
ALX028_18CORE	Wedowee	0.0725568	0.00155336	0.559842	0.0126653	0.0559611	0.000408775	451.527	18.6582	451.401	16.4216	450.5	32.4487	-0.227869	-0.027896	0.000124195
RSW003_02	Zana	0.0716547	0.0038318	1.36431	0.0891586	0.138091	0.00518029	839.213	136.302	987.897	107.883	1334.5	40.7268	79.7502	48.9396	0.00655647
RSW003_03	Zana	0.139041	0.0121062	1.64582	0.144365	0.0858491	0.000903903	532.708	13.9022	631.535	15.4049	1003	37.4929	37.1141	15.0506	0.000483356
RSW003_04core	Zana	0.0861497	0.00117185	0.862647	0.014184	0.0726236	0.000670604	246.519	5.301	1285.13	30.1346	4161	52.4175	46.8885	15.6486	0.00110454
RSW003_04rim	Zana	0.0389831	0.000427289	2.54566	0.0530091	0.473612	0.00838377	751.401	53.2353	1522.6	141.483	2859.5	276.248	94.0755	80.8176	0.0354777
RSW003_05	Zana	0.12363	0.00464928	3.47995	0.323262	0.204148	0.0173301	474.139	22.6057	683.408	42.1825	1451.5	133.081	73.7226	50.6502	0.0100553
RSW003_06	Zana	0.0763258	0.00188889	0.960282	0.0411464	0.0912485	0.00319036	382.341	11.3456	473.094	27.7511	941	137.818	67.3345	30.6213	0.00272393
RSW003_07	Zana	0.0611069	0.000934208	0.593528	0.0219267	0.0704449	0.00236857	415.35	32.4404	730.76	61.9047	1877	161.47	59.3686	19.1829	0.00108915
RSW003_08	Zana	0.0665544	0.00268708	1.05387	0.0635763	0.114844	0.00514375	752.144	101.963	779.026	79.9266	856.5	84.5379	77.8716	43.1619	0.00437388
RSW003_09	Zana	0.12376	0.00892275	1.15386	0.0864663	0.0676196	0.00137628	450.876	19.331	641.238	26.7675	1385.5	67.5495	12.184	3.45071	0.000799175
RSW003_11	Zana	0.0724486	0.00160925	0.880534	0.0249526	0.0881484	0.00155036	582.08	63.9253	592.985	53.3409	635	75.0732	67.4575	29.6866	0.00258776
RSW003_10	Zana	0.0945005	0.00544041	0.793252	0.0477288	0.0608801	0.00106178	448.808	10.5574	462.316	13.3063	530	57.8957	8.33382	1.83892	0.000126338
RSW003_12	Zana	0.0721045	0.000878286	0.576701	0.0103656	0.0580079	0.000766512	328.566	14.8365	1122.08	73.4274	3363.5	155.857	15.3193	2.92182	0.000243785
RSW003_13	Zana	0.0522918	0.00121167	2.01962	0.111186	0.280114	0.0139834	448.165	8.98174	953.234	174.394	2421.5	498.473	90.2314	70.718	0.0175261
RSW003_14	Zana	0.0719976	0.000747087	1.55701	0.229303	0.156846	0.023038	976.582	21.7732	1610.47	45.7098	2579.5	86.7499	81.4923	52.9848	0.00725453
RSW003_15C	Zana	0.163575	0.00196675	3.88494	0.111206	0.172253	0.00447379	362.9	27.33	587.73	44.1052	1589.5	117.702	62.1406	39.3606	0.00905814
OUR040-1	Zana	0.131753	0.00764427	1.33669	0.079025	0.0735818	0.000831586	797.831	86.7873	861.749	67.5396	1030	45.6899	22.5406	7.41723	0.000415434
OUR040-2	Zana	0.123982	0.00648936	1.24165	0.0660559	0.0726343	0.000688491	753.415	74.2209	819.589	58.9738	1003.5	38.4805	24.9212	8.07404	0.000268157
OUR040-3	Zana	0.0724642	0.00128033	0.636088	0.0160304	0.0636638	0.00114367	450.97	15.382	499.856	19.7996	730	76.1454	38.2233	9.78002	0.000492778
OUR040-4	Zana	0.074582	0.00161829	0.667173	0.0158101	0.0648788	0.000617554	463.687	19.401	518.966	19.1664	770	40.0848	39.781	10.6518	0.000301607
OUR040-5	Zana	0.085705	0.00343503	1.05421	0.05025	0.0892113	0.00229923	530.069	40.7255	730.929	49.0762	1408.5	98.6705	62.3664	27.4801	0.00191027
OUR040-6	Zana	0.15044	0.0102504	1.739	0.121377	0.0838371	0.00126303	903.398	114.362	1023.04	88.0505	1288.5	58.6514	29.8876	11.6949	0.000427193
OUR040-7	Zana	0.0712309	0.00103069	0.609835	0.016007	0.062093	0.00135947	443.553	12.3986	483.431	20.0917	677	93.6043	34.4826	8.24909	0.000268227
OUR040-8	Zana	0.11023	0.00336168	1.15201	0.0375814	0.0757974	0.000876849	674.063	38.9781	778.153	35.1562	1089.5	46.3573	38.131	13.3765	0.000749097
OUR040-9	Zana	0.073959	0.00127621	0.597241	0.0150416	0.0585676	0.00107404	459.949	15.3113	475.457	19.0338	551	80.0626	16.5247	3.26182	0.000153829
OUR040-10	Zana	0.0723766	0.000907516	0.60118	0.00950601	0.0602428	0.000580179	450.444	10.9058	477.958	12.0201	612	41.6208	26.3981	5.75672	0.000403802
OUR040-12	Zana	0.0720132	0.00150368	0.685121	0.0166955	0.0690008	0.000866347	448.259	18.0711	529.838	20.0199	898.5	51.8033	50.1103	15.397	0.000777611
OUR040-11	Zana	0.108688	0.0073234	1.04195	0.0726694	0.0695287	0.00124698	665.101	84.8804	724.849	71.0116	914	73.8256	27.2319	8.24291	0.000169854
OUR040-13	Zana	0.0916736	0.00124031	0.905166	0.0151658	0.0716114	0.000707485	565.409	14.6395	654.451	16.1008	974.5	40.288	41.9796	13.6056	0.000682291
OUR040-13core	Zana	0.0647762	0.00105918	0.540272	0.0100108	0.0604916	0.000526955	404.594	12.8183	438.581	13.1553	621	37.5888	34.848	7.74938	0.000542285
OUR040-13rim	Zana	0.0440543	0.00128968	0.435356	0.0141164	0.0716727	0.000998265	277.906	15.9156	366.954	19.8736	976.5	56.7735	71.5406	24.2668	0.00163037
OUR040-15	Zana	0.102232	0.00516852	1.14532	0.0608403	0.0812528	0.00132158	627.458	60.3131	774.993	56.7871	1227.5	63.8693	48.8833	19.037	0.0010178
OUR040-15rim	Zana	0.0576379	0.000671667	0.627007	0.0112092	0.0788974	0.00106939	361.233	8.1849	494.205	13.9421	1169.5	53.6735	69.1122	26.9062	0.00205797
*Ages calculated from measured 207Pb; 235U calculated from measured 238U.
**Ratio represents absolute 204 cps (Pb and Hg) after on-peak zero method used to reduce impact of 204Hg.
Discordance based on age difference between 206Pb/238U and 207Pb/206Pb or 207Pb/235U.
a and b notations are duplicates from the same CL-defined domain
R33, n=31, 206Pb/238U average of 420+-2 ma (2 s.e.m.)

## Sheet: Lu-Hf Table
Table S3. Lu-Hf isotope analysis
Sample	Unit	% Corr*	180Hf/177Hf	1 sigma error	176Lu/177Hf	1 sigma error	176Hf/177Hf	1 sigma error	e(0)	2 sigma error	Tbse**	Tdm (16)***	t(Ga)	2 sigma error	176Hf/177Hf(t)****	e(t)*****	Error
ALX001_1a	Zana	0.140032	1.88651	9.8e-05	0.00101746	2.7e-05	0.282509	2.7e-05	-9.76007	1.90958	0.439	1.02999	0.462	0.008	0.2825	0.221511	2.11374
ALX001_1b	Zana	0.244229	1.8865	0.00013	0.00203445	8.8e-05	0.28247	2.2e-05	-11.1392	1.55595	0.531858	1.11418	0.462	0.008	0.282452	-1.47092	1.79752
ALX001_2	Zana	0.192646	1.88661	9.2e-05	0.00152421	2.1e-05	0.282465	1.5e-05	-11.316	1.06088	0.531707	1.10609	0.462	0.008	0.282452	-1.49144	1.26136
ALX001_3core	Zana	0.179052	1.88676	8.8e-05	0.0013468	2.5e-05	0.282443	1.9e-05	-12.094	1.34378	0.56496	1.13181	0.462	0.008	0.282431	-2.21582	1.54671
ALX001_3rim	Zana	0.095458	1.88673	8e-05	0.000707133	3e-05	0.282493	2e-05	-10.3259	1.4145	0.473388	1.04379	0.462	0.008	0.282487	-0.249709	1.6205
ALX001_4core	Zana	0.542048	1.88696	0.00013	0.00726389	0.00035	0.28258	3.5e-05	-7.24932	2.47538	0.415312	1.11405	0.462	0.008	0.282517	0.819334	2.87764
ALX001_4rim	Zana	0.135495	1.8871	7.8e-05	0.001057	5e-05	0.282444	2.5e-05	-12.0586	1.76813	0.558326	1.12179	0.462	0.008	0.282435	-2.09155	1.98639
ALX001_5	Zana	0.176982	1.88704	0.00011	0.00129156	3.9e-05	0.282534	4.1e-05	-8.876	2.89973	0.414508	1.00232	0.462	0.008	0.282523	1.02243	3.11125
ALX001_6	Zana	0.225471	1.88681	0.00018	0.00184712	7.4e-05	0.282463	3e-05	-11.3867	2.12175	0.540427	1.11854	0.462	0.008	0.282447	-1.66126	2.35474
ALX001_7	Zana	0.147176	1.88687	0.00012	0.00111446	2.1e-05	0.282462	1.4e-05	-11.4221	0.990152	0.529931	1.09834	0.462	0.008	0.282452	-1.47199	1.19063
ALX001_8rim	Zana	0.136692	1.88678	0.0001	0.000955737	6.1e-06	0.282444	4.4e-05	-12.0586	3.1119	0.556603	1.11881	0.462	0.008	0.282436	-2.0605	3.30325
JKG013_001b	Coley Creek	0.192459	1.88706	0.00011	0.00152701	3e-05	0.282356	1.8e-05	-15.1705	1.27305	0.711682	1.25994	0.4781	0.0064	0.282342	-5.00669	1.44218
JKG013_002a	Coley Creek	0.187457	1.88681	9.8e-05	0.00158034	2e-05	0.282397	2e-05	-13.7207	1.4145	0.64514	1.20386	0.4781	0.0064	0.282383	-3.57221	1.57728
JKG013_004a	Coley Creek	0.251669	1.88706	0.00012	0.0019969	5.5e-05	0.282411	3.1e-05	-13.2256	2.19248	0.630146	1.19739	0.4781	0.0064	0.282393	-3.20882	2.37747
JKG013_004c	Coley Creek	0.170454	1.88692	9.5e-05	0.00128036	4.1e-05	0.282541	2.3e-05	-8.62846	1.62668	0.402852	0.992176	0.4781	0.0064	0.28253	1.62065	1.80278
JKG013_005a	Coley Creek	0.144813	1.88682	0.00014	0.00106051	3.2e-05	0.282488	3.6e-05	-10.5027	2.5461	0.486663	1.06049	0.4781	0.0064	0.282478	-0.185788	2.7165
JKG013_5b	Coley Creek	0.21999	1.88678	0.00015	0.00183324	7.6e-05	0.282429	3.4e-05	-12.5891	2.40465	0.596914	1.16652	0.4781	0.0064	0.282413	-2.51967	2.60298
JKG013_10a	Coley Creek	0.291806	1.88651	9.6e-05	0.00258896	7.7e-05	0.282349	2.6e-05	-15.4181	1.83885	0.747811	1.30672	0.4781	0.0064	0.282326	-5.59156	2.03781
JKG013_10b	Coley Creek	0.165029	1.88678	8.2e-05	0.00127274	5.9e-05	0.282419	2.4e-05	-12.9427	1.6974	0.603007	1.16324	0.4781	0.0064	0.282408	-2.69577	1.88494
JKG013_12b	Coley Creek	0.179802	1.88706	0.00012	0.00135382	5.6e-05	0.282385	3.7e-05	-14.145	2.61683	0.660326	1.21348	0.4781	0.0064	0.282373	-3.92511	2.80246
JKG013_20a	Coley Creek	0.311615	1.88683	0.0001	0.00318851	0.00015	0.282534	3.3e-05	-8.876	2.33393	0.440257	1.05538	0.4781	0.0064	0.282505	0.767193	2.57923
JKG013_21	Coley Creek	0.224722	1.88687	0.00014	0.002162	0.00015	0.282344	3.5e-05	-15.5949	2.47538	0.746126	1.29878	0.4781	0.0064	0.282325	-5.63304	2.72068
JKG013_23a	Coley Creek	0.213282	1.88657	0.00012	0.00160765	3.5e-05	0.282405	2.7e-05	-13.4378	1.90958	0.632452	1.19343	0.4781	0.0064	0.282391	-3.29767	2.08188
JKG013_23c	Coley Creek	0.242013	1.88696	0.00011	0.00202618	9.8e-05	0.282508	2.5e-05	-9.79543	1.76813	0.467855	1.0595	0.4781	0.0064	0.28249	0.215712	1.98042
JKG013_27	Coley Creek	0.20066	1.88684	9.4e-05	0.00162672	5.3e-05	0.282438	2.4e-05	-12.2708	1.6974	0.578167	1.14735	0.4781	0.0064	0.282423	-2.13552	1.88113
JKG013_27b	Coley Creek	0.199246	1.88695	9.4e-05	0.00163938	7.3e-05	0.282458	2.8e-05	-11.5636	1.9803	0.545227	1.11942	0.4781	0.0064	0.282443	-1.43153	2.17672
JKG013_28b	Coley Creek	0.274705	1.88698	0.00012	0.00290153	9.6e-05	0.282387	4.3e-05	-14.0743	3.04118	0.689958	1.26245	0.4781	0.0064	0.282361	-4.34556	3.2522
JKG013_30a	Coley Creek	0.185786	1.88697	0.00011	0.00143516	4.1e-05	0.28241	2.5e-05	-13.261	1.76813	0.620851	1.18093	0.4781	0.0064	0.282397	-3.06592	1.94423
JKG013_30b	Coley Creek	0.249095	1.8866	0.00012	0.00186004	8.4e-05	0.282408	2.6e-05	-13.3317	1.83885	0.632449	1.19726	0.4781	0.0064	0.282391	-3.27158	2.04226
JKG013_30c	Coley Creek	0.189733	1.88647	0.0001	0.00148107	4.9e-05	0.282473	2.2e-05	-11.0331	1.55595	0.517785	1.09353	0.4781	0.0064	0.28246	-0.850279	1.73714
JKG013_30d	Coley Creek	0.255332	1.88667	0.00012	0.00213381	0.00017	0.282407	2.6e-05	-13.367	1.83885	0.639601	1.20756	0.4781	0.0064	0.282388	-3.39388	2.09685
JKG013_32rim	Coley Creek	0.27661	1.88671	9.4e-05	0.00248707	6.5e-05	0.282421	2.7e-05	-12.872	1.90958	0.623001	1.19896	0.4781	0.0064	0.282399	-3.0104	2.10092
JKG013_33	Coley Creek	0.195955	1.88681	8.1e-05	0.00146824	2.5e-05	0.282407	2.1e-05	-13.367	1.48523	0.626429	1.18619	0.4781	0.0064	0.282394	-3.18262	1.65118
JKG013_36core	Coley Creek	0.258846	1.88673	8.5e-05	0.00215792	0.0001	0.282358	2.3e-05	-15.0998	1.62668	0.722505	1.27859	0.4781	0.0064	0.282339	-5.13614	1.84024
JKG013_37	Coley Creek	0.231162	1.88658	9.2e-05	0.00176661	5e-05	0.282358	3.2e-05	-15.0998	2.2632	0.713683	1.26519	0.4781	0.0064	0.282342	-5.01194	2.44502
JKG013_39a	Coley Creek	0.161986	1.88684	9.7e-05	0.00122139	4.5e-05	0.282455	2.5e-05	-11.6696	1.76813	0.543136	1.11125	0.4781	0.0064	0.282444	-1.40506	1.94677
JKG029_01rim	Zana	0.0842873	1.88658	0.00011	0.000531291	2.6e-05	0.282284	3.1e-05	-17.7166	2.19248	0.805393	1.32616	0.465	0.003	0.282279	-7.52809	2.27888
JKG029_009	Zana	0.120609	1.88694	0.00014	0.000767952	5.6e-05	0.282156	3.6e-05	-22.243	2.5461	1.01644	1.5105	0.465	0.003	0.282149	-12.1322	2.65102
JKG029_011rim	Zana	0.279397	1.88655	0.00011	0.00221685	7.9e-05	0.282189	2.2e-05	-21.0761	1.55595	1.00766	1.52255	0.465	0.003	0.28217	-11.4113	1.67507
JKG029_020acore	Zana	0.203243	1.8869	0.00013	0.00139341	2.4e-05	0.282122	3.7e-05	-23.4454	2.61683	1.09142	1.58294	0.465	0.003	0.28211	-13.5289	2.70199
RAS024_006rim	Coley Creek	0.111111	1.88682	0.00015	0.00107555	7.1e-06	0.282592	4.8e-05	-6.82497	3.39481	0.316897	0.915432	0.4703	0.0162	0.282583	3.32185	3.77913
RAS024_017a	Coley Creek	0.201203	1.88638	0.00019	0.00163425	8.4e-05	0.282442	3.8e-05	-12.1294	2.68755	0.571671	1.14192	0.4703	0.0162	0.282428	-2.16252	3.11989
RAS024_023b	Coley Creek	0.314949	1.8868	0.00015	0.00371955	7.6e-05	0.282261	4.8e-05	-18.53	3.39481	0.931152	1.47983	0.4703	0.0162	0.282228	-9.22088	3.82215
RAS024_027	Coley Creek	0.276052	1.88678	7.9e-05	0.00263756	3.8e-05	0.282459	2e-05	-11.5282	1.4145	0.561	1.14864	0.4703	0.0162	0.282436	-1.87396	1.81812
RED002_004	Kowaliga	0.161024	1.88682	0.00015	0.00110853	1.8e-05	0.282501	3.2e-05	-10.043	2.2632	0.466138	1.04365	0.458	0.0031	0.282491	-0.176241	2.34684
RED002_033	Kowaliga	0.606172	1.88638	0.00019	0.0081597	0.00054	0.282041	9.1e-05	-26.3097	6.43598	1.54395	2.06478	0.458	0.0031	0.281971	-18.6031	6.83699
RED002_057	Kowaliga	0.510587	1.8868	0.00015	0.00553458	0.00028	0.282286	4e-05	-17.6459	2.829	0.943959	1.52045	0.458	0.0031	0.282238	-9.13242	3.07193
RED002_060bring	Kowaliga	0.147415	1.88678	7.9e-05	0.00101438	3.6e-05	0.282516	2e-05	-9.51253	1.4145	0.440349	1.02014	0.458	0.0031	0.282507	0.383359	1.50908
RED002_078	Kowaliga	0.169831	1.88698	0.0001	0.00122866	0.00015	0.282513	2.7e-05	-9.61861	1.90958	0.448174	1.03013	0.458	0.0031	0.282502	0.212025	2.07347
RAS021_002arim	Coley Creek	0.304686	1.88699	0.0001	0.00324891	0.00019	0.282429	3.3e-05	-12.5891	2.33393	0.624594	1.21263	0.476	0.0148	0.2824	-3.01149	2.80107
RAS021_002brim	Coley Creek	0.270832	1.88633	0.00051	0.00334608	0.0001	0.282484	0.0001	-10.6441	7.07251	0.530262	1.13433	0.476	0.0148	0.282454	-1.09519	7.48277
RAS021_005b	Coley Creek	0.176453	1.88704	0.00017	0.00184422	0.00016	0.282471	3.4e-05	-11.1038	2.40465	0.527018	1.10706	0.476	0.0148	0.282455	-1.08081	2.85283
RAS021_006	Coley Creek	0.240005	1.88669	0.00021	0.00217328	2.3e-05	0.282405	3.3e-05	-13.4378	2.33393	0.643767	1.21172	0.476	0.0148	0.282386	-3.5212	2.69552
RAS021_007	Coley Creek	0.27155	1.88692	0.0001	0.0026317	8.2e-05	0.282487	3.2e-05	-10.538	2.2632	0.512949	1.10771	0.476	0.0148	0.282464	-0.76325	2.66209
RAS021_008b	Coley Creek	0.325723	1.88673	0.00019	0.00310787	0.00019	0.282568	4.2e-05	-7.67367	2.97045	0.379829	1.00277	0.476	0.0148	0.28254	1.95369	3.43759
RAS021_009arim	Coley Creek	0.350041	1.88688	0.00017	0.00421031	0.00026	0.282435	4.8e-05	-12.3769	3.39481	0.634098	1.23696	0.476	0.0148	0.282397	-3.1029	3.90619
RAS021_009b	Coley Creek	0.188481	1.88688	0.00013	0.00162579	7.1e-05	0.282488	4.4e-05	-10.5027	3.1119	0.495227	1.07651	0.476	0.0148	0.282473	-0.409982	3.50384
RAS021_010	Coley Creek	0.234159	1.88676	0.00011	0.00254805	7.1e-05	0.282551	3e-05	-8.27484	2.12175	0.402117	1.01212	0.476	0.0148	0.282528	1.52879	2.51369
RAS021_012arim	Coley Creek	0.282109	1.88696	9.5e-05	0.00242708	3.7e-05	0.282432	3.2e-05	-12.483	2.2632	0.603124	1.18109	0.476	0.0148	0.28241	-2.6456	2.63365
RAS021_014a	Coley Creek	0.133104	1.88712	9.3e-05	0.000975528	1.5e-05	0.282466	1.9e-05	-11.2807	1.34378	0.521182	1.08876	0.476	0.0148	0.282457	-0.983302	1.70032
RAS021_014c	Coley Creek	0.348356	1.88682	0.00013	0.00316413	5.9e-05	0.282474	3.2e-05	-10.9978	2.2632	0.54453	1.14335	0.476	0.0148	0.282446	-1.3917	2.64755
RAS021_016core	Coley Creek	0.275097	1.88672	9.4e-05	0.00232496	0.00011	0.282517	2.7e-05	-9.47716	1.90958	0.457025	1.05512	0.476	0.0148	0.282496	0.395683	2.32616
DEX023_01	Zana	0.204857	1.88687	9.2e-05	0.00158204	6e-05	0.282445	2e-05	-12.0233	1.4145	0.565778	1.13609	0.4657	0.0053	0.282431	-2.1382	1.57588
DEX023_02	Zana	0.192656	1.8868	8.1e-05	0.00149983	6.2e-05	0.282489	2.2e-05	-10.4673	1.55595	0.491639	1.07148	0.4657	0.0053	0.282476	-0.555217	1.71857
DEX023_05	Zana	0.277046	1.88697	0.00013	0.00245463	6.9e-05	0.282503	2e-05	-9.97224	1.4145	0.482785	1.07916	0.4657	0.0053	0.282482	-0.354779	1.58145
DEX023_06	Zana	0.219352	1.88684	9.2e-05	0.00184414	1.8e-05	0.282475	2.6e-05	-10.9624	1.83885	0.520335	1.10136	0.4657	0.0053	0.282459	-1.15724	1.97427
DEX023_08	Zana	0.394091	1.88669	9.9e-05	0.00378623	9.5e-05	0.282368	2.3e-05	-14.7462	1.62668	0.743971	1.32256	0.4657	0.0053	0.282335	-5.54531	1.8097
OUR018_001RIM	Zana	0.214892	1.88702	8.3e-05	0.00132536	5.3e-05	0.282326	1.4e-05	-16.2314	0.990152	0.756376	1.29523	0.462	0.016	0.282315	-6.35092	1.39786
OUR018_002CORE	Zana	0.0973965	1.88674	5.9e-05	0.000588291	3.1e-05	0.282287	2e-05	-17.6106	1.4145	0.801979	1.324	0.462	0.016	0.282282	-7.50546	1.80871
OUR018_002RIM	Zana	0.296829	1.88679	9.4e-05	0.00185829	2.2e-05	0.282328	1.5e-05	-16.1607	1.06088	0.765658	1.31092	0.462	0.016	0.282312	-6.44355	1.44957
OUR018_005CORE	Zana	0.120062	1.88703	8.7e-05	0.000779766	6.6e-06	0.282281	2.5e-05	-17.8227	1.76813	0.816267	1.33888	0.462	0.016	0.282274	-7.77657	2.14738
OUR018_007CORE	Zana	0.139833	1.887	0.00011	0.000867045	2.7e-05	0.282417	2.2e-05	-13.0134	1.55595	0.598811	1.15367	0.462	0.016	0.282409	-2.98907	1.94771
OUR018_007RIM	Zana	0.174691	1.88687	9e-05	0.000979182	8.1e-05	0.282362	2.1e-05	-14.9584	1.48523	0.690083	1.2335	0.462	0.016	0.282354	-4.9704	1.91011
OUR018_008CORE	Zana	0.0780604	1.88672	8.2e-05	0.000436562	8.7e-06	0.282318	3.3e-05	-16.5143	2.33393	0.748987	1.27642	0.462	0.016	0.282314	-6.36156	2.71446
OUR018_008RIM	Zana	0.19177	1.88694	8.2e-05	0.00098968	5.2e-05	0.282345	1.8e-05	-15.5595	1.27305	0.717862	1.25745	0.462	0.016	0.282336	-5.5754	1.68014
OUR018_010ICORE	Zana	0.163662	1.88676	0.00011	0.000961254	1.8e-05	0.282226	2.4e-05	-19.7677	1.6974	0.909583	1.42139	0.462	0.016	0.282218	-9.77917	2.08364
OUR018_011CORE	Zana	0.168043	1.88697	0.00011	0.00121662	8.3e-05	0.282081	2.2e-05	-24.8952	1.55595	1.15194	1.63248	0.462	0.016	0.28207	-14.9903	1.98206
OUR018_013CORE	Zana	0.164688	1.88686	8.3e-05	0.00099766	1.8e-05	0.282146	1.6e-05	-22.5967	1.1316	1.03965	1.5334	0.462	0.016	0.282137	-12.6223	1.51784
OUR018_13CORE	Zana	0.154343	1.88687	0.00013	0.000946303	1.2e-05	0.282215	2.4e-05	-20.1567	1.6974	0.926907	1.43604	0.462	0.016	0.282207	-10.164	2.07996
OUR018_13RIM	Zana	0.191085	1.88679	0.00011	0.00161552	2.5e-05	0.282388	3.2e-05	-14.0389	2.2632	0.660734	1.21771	0.462	0.016	0.282374	-4.24517	2.65374
OUR018_14	Zana	0.157465	1.88665	0.00012	0.00126316	4.2e-05	0.282253	4e-05	-18.8129	2.829	0.874023	1.39505	0.462	0.016	0.282242	-8.91598	3.22996
OUR018_15	Zana	0.107251	1.88686	0.00022	0.000974881	4.8e-05	0.282288	7.3e-05	-17.5752	5.16293	0.809793	1.33603	0.462	0.016	0.28228	-7.58861	5.56757
OUR018_15	Zana	0.107251	1.88734	0.00024	0.000974881	4.8e-05	0.282288	7.3e-05	-17.5752	5.16293	0.809793	1.33603	0.462	0.016	0.28228	-7.58861	5.56757
OUR018_16	Zana	0.13031	1.88734	0.00024	0.000918965	5e-05	0.282201	3.6e-05	-20.6517	2.5461	0.948685	1.45435	0.462	0.016	0.282193	-10.6512	2.95197
OUR018_19LEFT	Zana	0.290502	1.88674	0.00017	0.00182377	6.3e-05	0.282225	3e-05	-19.803	2.12175	0.935715	1.45563	0.462	0.016	0.282209	-10.0791	2.53559
OUR018_20CORE	Zana	0.0835812	1.88686	9.1e-05	0.000513164	1.5e-05	0.282298	2.9e-05	-17.2216	2.05103	0.782625	1.30636	0.462	0.016	0.282294	-7.09303	2.43543
OUR018_21RIM	Zana	0.229194	1.88669	0.00012	0.00187269	3.3e-05	0.282503	8.7e-05	-9.97224	6.15308	0.473969	1.06226	0.462	0.016	0.282487	-0.253144	6.54852
OUR018_23CORE	Zana	0.0402333	1.887	0.00036	0.000182749	1.9e-05	0.282311	2.2e-05	-16.7619	1.55595	0.754401	1.27761	0.462	0.016	0.282309	-6.53152	1.94281
OUR018_26CORE	Zana	0.0990872	1.88696	7.9e-05	0.000617764	2.2e-05	0.282196	2.5e-05	-20.8285	1.76813	0.948075	1.44984	0.462	0.016	0.282191	-10.7358	2.15682
OUR018_30RIM	Zana	0.115117	1.88689	0.00012	0.000584721	2.1e-05	0.282356	2.6e-05	-15.1705	1.83885	0.691501	1.22912	0.462	0.016	0.282351	-5.06183	2.22693
OUR018_30RIM	Zana	0.115117	1.88719	0.00016	0.000584721	2.1e-05	0.282356	2.6e-05	-15.1705	1.83885	0.691501	1.22912	0.462	0.016	0.282351	-5.06183	2.22693
OUR018_31CORE	Zana	0.092609	1.88719	0.00016	0.000579753	1.4e-06	0.28225	2.1e-05	-18.919	1.48523	0.860866	1.37445	0.462	0.016	0.282245	-8.8126	1.86129
OUR018_31CORE	Zana	0.092609	1.88663	0.00013	0.000579753	1.4e-06	0.28225	2.1e-05	-18.919	1.48523	0.860866	1.37445	0.462	0.016	0.282245	-8.8126	1.86129
OUR018_31RIM	Zana	0.129719	1.88663	0.00013	0.000991491	1.9e-05	0.282343	2e-05	-15.6302	1.4145	0.721143	1.26029	0.462	0.016	0.282334	-5.64676	1.80136
JKG060_006	Zana	0.360202	1.88676	7.8e-05	0.00305071	0.00035	0.282193	3.6e-05	-20.9346	2.5461	1.02802	1.55184	0.455	0.022	0.282167	-11.7304	3.27339
JKG060_002CORE	Zana	0.182304	1.88686	9.4e-05	0.00185129	7.7e-05	0.282428	3.6e-05	-12.6244	2.5461	0.59892	1.16851	0.455	0.022	0.282412	-3.0496	3.10851
JKG060_020CORE	Zana	0.251003	1.88704	0.00011	0.00208406	3.7e-05	0.282514	2.6e-05	-9.58325	1.83885	0.458601	1.05254	0.455	0.022	0.282496	-0.0756272	2.3771
*Percent correction refers to the percentage difference between the raw and Lu+Yb corrected 176Hf/177Hf ratio.
**Age based on paramters of Bouvier et al. (2008) for CHUR.
***Refers to depleted mantle curve with modern DM at +16.
****Quoted error is propagated using quoted errors for age and isotopic ratios.
*****extrapolation to Initial eHf calculated using measured Lu/Hf and measured 206Pb/238U age.
see supplemental information on error calculation.

## Sheet: Sample Locations
Table S4. Latitude-longitude (WGS84), geologic unit, and age information for samples analyzed as part of this project.
Sample	Latitude	Longitude	Unit	Best Age (Ma)
JKG006	32.9803	-85.8098	Zana	459 ± 3
JKG013	32.9735	-85.8504	Informal Coley Creek (Zana)	459 ± 2
ALX028	32.8833	-85.9638	Wedowee (metavolcanic)	454 ± 3
EQU002	32.8093	-86.036	Zana	453 ± 7
OUR040	32.8473	-85.9292	Zana	453 ± 8
RSW003	32.7503	-86.1433	Zana	453 ± 7
JKG030	32.8966	-85.8324	Kowaliga	452 ± 6
RAS024	32.9303	-85.8869	Informal Coley Creek (Zana)	451 ± 10
JKG060	32.983	-85.75	Zana	449 ± 5
OUR018	32.8425	-85.9757	Zana	449 ± 8
JKG029	32.9136	-85.8344	Zana	448 ± 5
DEX023	32.7467	-86.1479	Zana	447 ± 3
OUR029	32.8028	-85.9192	Kowaliga	440 ± 4
BUT010	32.9704	-85.7445	Kowaliga	437 ± 3
RAS021	32.9295	-85.8889	Informal Coley Creek (Zana)	437 ± 7
RED002	32.6818	-85.9355	Kowaliga	436 ± 4
RED003	32.6832	-85.9343	Kowaliga	435 ± 5
RED005	32.7447	-85.9604	Kowaliga	435 ± 8
ALX001	32.9033	-85.8889	Zana	430 ± 7
